# Supplementary material for: Green synthesis of N-sulfonyl amidine using a CuI-incorporated CoFe2O4 nano-catalyst in aqueous medium
Source: Royal Society of Chemistry journal article supplement (doi:10.1039/d4gc04033c), 2024-01-01

# Supporting Information

---

## Green synthesis of *N*-sulfonyl amidine using CuI incorporated CoFe<sub>2</sub>O<sub>4</sub> nano-catalyst in aqueous medium

Samrat Charaimuria, Prodeep Phukan\*

*Department of Chemistry, Gauhati University, Guwahati – 781014, Assam, India*

E-mail: [pphukan@gauhati.ac.in](mailto:pphukan@gauhati.ac.in)

### Table of Contents

|    |                                                      |         |
|----|------------------------------------------------------|---------|
| 1. | General information                                  | S2      |
| 2. | Experimental procedures and characterization details | S2      |
| 3. | Green Chemistry Metrics calculations                 | S4      |
| 4. | Spectroscopic data                                   | S5-S13  |
| 5. | References                                           | S13     |
| 6. | <sup>1</sup> H and <sup>13</sup> C NMR spectra       | S14-S65 |

## 1. General information:

The reagents were obtained from commercial suppliers and used without further purification with the exception of *N*-sulfonyl azide, which were prepared by following the corresponding methods reported in the literature.<sup>1</sup> Commercially available terminal alkynes, ammonium chloride, were directly employed without any previous purification technique (distillation/use of molecular sieves). FT-IR spectra was recorded using Affinity-1 SHIMADZU. Powder X-ray diffraction (XRD) was recorded using a Rigaku X-ray diffractometer with Cu-K $\alpha$  radiation at a wavelength of 1.5418 Å. FESEM and EDAX analyses was recorded using a ZEISS sigma 300 scanning along with energy dispersive X-ray spectrometer (EDX). TEM analysis was performed using a JEOL JEM-2100 electron microscope. Thermogravimetric analysis (TGA) was performed on a Mettler Toledo TGA/DSC 1, STAR system analyzer. Vibrating sample magnetometer (Lakeshore 7410) was used to determine the magnetic property of the prepared nanocatalyst. X-Ray Photoelectron Spectroscopy (XPS) data was determined using PHI 5000 VersaProbe III. <sup>1</sup>H and <sup>13</sup>C spectra were recorded on a Bruker Ultrashield 400/600 MHz spectrometer. Chemical shift are given in  $\delta$  units relative to tetramethylsilane (TMS) signal as an internal reference in CDCl<sub>3</sub>. <sup>1</sup>H NMR coupling constants were reported in Hz and multiplicity was indicated as follows: s (singlet); d (doublet); t (triplet); q (quartet); m (multiplet); br (broad); dd (doublet of doublets). Chromatographic purification was performed using column chromatography over a manually packed column containing silica gel (230-400 mesh). Melting points were measured in Relitech melting point apparatus. The NMR spectra for all the prepared compounds are included in the following sections of this supporting information.

## 2. Experimental procedures and characterization details:

### 2.1. General procedure for the synthesis of *N*-sulfonyl amidine compounds

To a stirred mixture of prepared catalyst (10 wt%), NH<sub>4</sub>Cl (27 mg, 0.5 mmol), and phenylacetylene (51 mg, 0.5 mmol), in H<sub>2</sub>O (2 ml), triethylamine (0.14 ml, 0.75 mmol) was

added slowly at room temperature. After 2-3 min, *p*-toluenesulfonyl azide (99 mg, 0.5 mmol) was added portionwise. The reaction was stirred at room temperature for 20 min. After the completion of the reaction (TLC), the catalyst was recovered with the help of an external magnet. The organic parts were separated out by adding ethyl acetate (15 ml). The combined organic layer was dried over Na<sub>2</sub>SO<sub>4</sub> and concentrated in vacuo. The crude residue was then purified by column chromatography on silica gel (ethyl acetate: petroleum ether, 3:7) to afford the desired product.

### 3. Green Chemistry Metrics Calculations:

$$\text{E-factor (Environmental factor)} = \frac{\text{Mass of product}}{\text{Mass of waste}}$$

$$\text{Atom economy (\%)} = (\text{AE}) = \frac{\text{Molecular mass of desired product}}{\text{Molecular mass of all reactants}} \times 100$$

$$\text{Atom efficiency (\%)} = \frac{\text{Yield of the product (\%)}}{\text{Atom economy (\%)}} \times 100$$

$$\text{Carbon efficiency (\%)} = \frac{\text{Total no. of C in reactants}}{\text{Total no. of C in products}} \times 100$$

$$\text{Reaction mass efficiency (\%)} = (\text{RME}) = \frac{\text{Mass of desired product}}{\text{Mass of all reactants}} \times 100$$

Table S1. Evaluation of green chemistry metrics for the synthesis of **4i** from hex-1-yne.

|                                                                                |                                 |               |           |           |
|--------------------------------------------------------------------------------|---------------------------------|---------------|-----------|-----------|
| Reactant 1                                                                     | Hex-1-yne                       | 0.029g        | 0.5 mmol  | FW 82.14  |
| Reactant 2                                                                     | 4-methyl benzenesulfonylazide   | 0.088g        | 0.5 mmol  | FW 197.21 |
| Reactant 3                                                                     | Ammonium chloride               | 0.026g        | 0.5 mmol  | FW 53.49  |
| Solvent                                                                        | Water                           | 1.994g (2 mL) | -----     |           |
| Product                                                                        | <i>N'</i> -tosyl hexanimidamide | 0.122g        | 0.45 mmol | FW 268.37 |
| Product yield = 92%                                                            |                                 |               |           |           |
| E-factor = (0.029+0.088+0.026+1.994-0.122)/0.122 = 16.51 Kg waste/1Kg product. |                                 |               |           |           |
| Atom economy = (268.37/332.84) x100 = 80.63%                                   |                                 |               |           |           |
| Atom efficiency = 92% x 80.63% /100 = 74.17%                                   |                                 |               |           |           |
| Carbon efficiency = 13/13 x100 = 100%                                          |                                 |               |           |           |
| Reaction mass efficiency = 0.122/(0.029+0.088+0.026)g x100 = 85.31%            |                                 |               |           |           |

Table S2. Evaluation of green chemistry metrics for the synthesis of **4i** by a known procedure.<sup>25-26</sup>

|                                                                                |                                 |              |           |           |
|--------------------------------------------------------------------------------|---------------------------------|--------------|-----------|-----------|
| Reactant 1                                                                     | Hex-1-yne                       | 0.029g       | 0.5 mmol  | FW 82.14  |
| Reactant 2                                                                     | 4-methyl benzenesulfonylazide   | 0.088g       | 0.5 mmol  | FW 197.21 |
| Reactant 3                                                                     | Ammonium chloride               | 0.026g       | 0.5 mmol  | FW 53.49  |
| Solvent                                                                        | Dichloromethane                 | 1.33g (1 mL) | -----     |           |
| Product                                                                        | <i>N'</i> -tosyl hexanimidamide | 0.107g       | 0.39 mmol | FW 268.37 |
| Product yield = 81%                                                            |                                 |              |           |           |
| E-factor = (0.029+0.088+0.026+1.994-0.107)/0.107 = 18.97 Kg waste/1Kg product. |                                 |              |           |           |
| Atom economy = (268.37/332.84) x100 = 80.63%                                   |                                 |              |           |           |
| Atom efficiency = 81% x 80.63% /100 = 65.31%                                   |                                 |              |           |           |
| Carbon efficiency = 13/13 x100 = 100%                                          |                                 |              |           |           |
| Reaction mass efficiency = 0.107/(0.029+0.088+0.026)g x100 = 74.82%            |                                 |              |           |           |

#### 4. Spectroscopic data:

1. **2-phenyl-*N'*-tosylacetimidamide (4a)<sup>1</sup>** : White solid; m.p. 114-115 °C; <sup>1</sup>H NMR (500

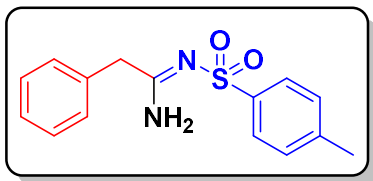

MHz, CDCl<sub>3</sub>)  $\delta$  (ppm) = 8.09 (br, 1H), 7.81 (d,  $J$  = 7.9 Hz, 2H), 7.37-7.32 (m, 3H), 7.28 (d,  $J$  = 8.2 Hz, 2H), 7.22 (d,  $J$  = 6.6 Hz, 2H), 5.69 (br, 1H), 3.65 (s, 2H), 2.43 (s, 3H); <sup>13</sup>C NMR (125 MHz, CDCl<sub>3</sub>)  $\delta$  (ppm) = 167.21, 143.02, 139.12, 133.27, 129.62, 129.35, 129.27, 128.10, 126.41, 43.71, 21.49; IR (KBr)  $\nu$  3366, 3234, 3065, 3024, 2967, 2912, 2856, 1656, 1550, 1488, 1446, 1417, 1271, 1271, 1138, 1082, 1082, 957, 810, 705 cm<sup>-1</sup>.

2. **2-(4-(dimethylamino)phenyl)-*N'*-tosylacetimidamide (4b)** : Brown solid; m.p. 100-101

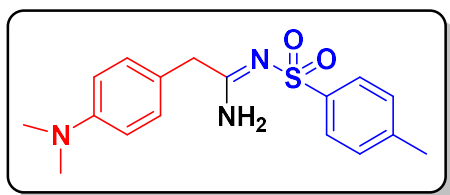

°C; <sup>1</sup>H NMR (400 MHz, CDCl<sub>3</sub>)  $\delta$  (ppm) = 8.79 (d,  $J$  = 7.3 Hz, 1H), 8.41 (d,  $J$  = 9 Hz, 1H), 8.20 (br, 1H), 7.92 (d,  $J$  = 8.2 Hz, 1H), 7.82 (d,  $J$  = 8.2 Hz, 1H), 7.53-7.50 (m, 1H), 7.46 (br, 1H), 7.33-7.30 (m, 2H), 7.17 (t,  $J$  = 6.9 Hz, 1H), 2.42 (s, 2H), 1.60 (br, 6H), 1.26 (s, 3H); <sup>13</sup>C NMR (125 MHz, CDCl<sub>3</sub>)  $\delta$  (ppm) = 155.74, 143.02, 139.54, 129.72, 129.43, 126.41, 125.74, 120.69, 116.81, 31.91, 29.68, 21.51; IR (KBr)  $\nu$  3315, 3022, 2983, 2845, 1625, 1589, 1448, 1340, 815, 765 cm<sup>-1</sup>; HRMS (ESI)  $m/z$  calcd. for [M+H]<sup>+</sup>: 332.1427, found: 332.1421.

3. **2-(4-(*tert*-butyl)phenyl)-*N'*-tosylacetimidamide (4c)** : White solid; m.p. 89-90 °C; <sup>1</sup>H

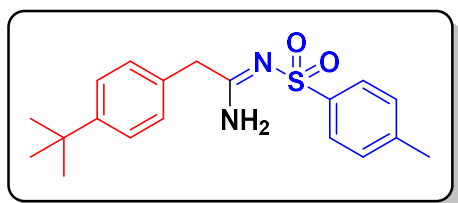

NMR (500 MHz, CDCl<sub>3</sub>)  $\delta$  (ppm) = 8.10 (br, 1H), 7.84 (d,  $J$  = 7.9 Hz, 2H), 7.38 (d,  $J$  = 8.2 Hz, 2H), 7.30 (d,  $J$  = 7.9 Hz, 2H), 7.15 (d,  $J$  = 7.9 Hz, 2H), 5.59 (br, 1H), 3.64 (s, 2H), 2.43 (s, 3H), 1.32 (s, 9H); <sup>13</sup>C NMR (125 MHz, CDCl<sub>3</sub>)  $\delta$  (ppm) =

167.43, 151.34, 142.98, 139.24, 129.97, 129.46, 129.35, 126.47, 126.29, 43.23, 34.59, 31.25, 21.52; **IR (KBr)**  $\nu$  3366, 3226, 3073, 3017, 2961, 2905, 2864, 1669, 1564, 1508, 1467, 1397, 1355, 1250, 1194, 1079, 1013, 957, 845, 810, 768  $\text{cm}^{-1}$ ; **HRMS (ESI) m/z** calcd. for  $[\text{M}+\text{H}]^+$ : 345.1631, found: 345.1638.

4. **2-(3-methoxyphenyl)-N'-tosylacetimidamide (4d)** : White solid; m.p. 100-101 °C; **<sup>1</sup>H**

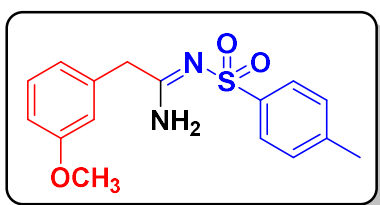

**NMR (400 MHz, CDCl<sub>3</sub>)  $\delta$  (ppm)** = 8.13 (br, 1H), 7.84 (d,  $J$  = 8.2 Hz, 2H), 7.32-7.28 (m, 3H), 6.88 (dd,  $J$  = 2.2 Hz, 8.2 Hz, 1H), 6.81 (d,  $J$  = 7.7 Hz, 1H), 6.76 (s, 1H), 5.69 (br, 1H), 3.79 (s, 3H), 3.64 (s, 2H), 2.44 (s, 3H); **<sup>13</sup>C**

**NMR (100 MHz, CDCl<sub>3</sub>)  $\delta$  (ppm)** = 167.02, 160.20, 143.06, 139.08, 134.58, 130.38, 129.36, 126.44, 121.82, 115.12, 113.72, 55.23, 43.74, 21.51; **IR (KBr)**  $\nu$  3436, 3324, 3051, 3010, 2968, 2919, 2842, 1613, 1586, 1536, 1494, 1257, 1187, 1076, 943, 908, 873, 810, 754  $\text{cm}^{-1}$ ; **HRMS (ESI) m/z** calcd. for  $[\text{M}+\text{H}]^+$ : 319.1111, found: 319.1095.

5. **2-(p-tolyl)-N'-tosylacetimidamide (4e)<sup>1</sup>** : White solid; m.p. 123-124 °C; **<sup>1</sup>H NMR (400**

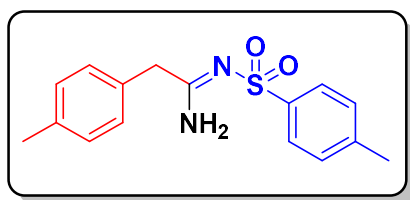

**MHz, CDCl<sub>3</sub>)  $\delta$  (ppm)** = 8.10 (br, 1H), 7.83 (d,  $J$  = 8.2 Hz, 2H), 7.30 (d,  $J$  = 8.2 Hz, 2H), 7.18-7.09 (m, 4H), 5.76 (br, 1H), 3.59 (s, 2H), 2.41 (s, 3H), 2.33 (s, 3H); **<sup>13</sup>C NMR (100 MHz, CDCl<sub>3</sub>)  $\delta$  (ppm)** = 167.68, 142.88, 139.10, 137.72, 130.22, 129.78, 129.39,

129.25, 126.29, 43.15, 21.42, 20.98; **IR (KBr)**  $\nu$  3436, 3366, 3234, 3065, 3024, 2912, 2856, 1732, 1655, 1550, 1488, 1411, 1180, 1082, 894, 859, 796  $\text{cm}^{-1}$ .

6. **2-(4-propylphenyl)-N'-tosylacetimidamide (4f)** : White solid; m.p. 79-80 °C; **<sup>1</sup>H NMR**

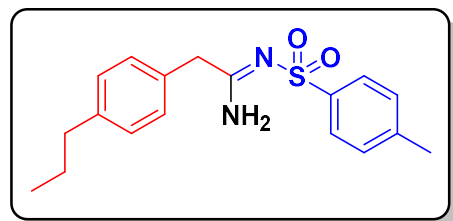

**(400 MHz, CDCl<sub>3</sub>)  $\delta$  (ppm)** = 8.00 (br, 1H), 7.73 (d,  $J$  = 8.2 Hz, 2H), 7.23-7.19 (m, 2H), 7.08-7.02 (m, 4H), 5.65 (br, 1H), 3.54 (s, 2H), 2.49 (t,  $J$  = 7.5 Hz, 2H), 2.34 (s, 3H), 1.59-1.50 (m, 9H), 0.86 (t,  $J$  = 7.3 Hz, 3H); **<sup>13</sup>C NMR (100 MHz, CDCl<sub>3</sub>)  $\delta$**

**(ppm)** = 167.62, 142.97, 142.71, 139.10, 130.26, 129.53, 129.32, 128.39, 126.38, 43.26,

37.57, 24.41, 24.38, 21.49, 13.79, 13.75; **IR (KBr)**  $\nu$  3359, 3234, 2968, 2927, 2870, 1648, 1544, 1502, 1417, 1271, 1146, 1082, 943, 810, 761  $\text{cm}^{-1}$ ; **HRMS (ESI)**  $m/z$  calcd. for  $[\text{M}+\text{H}]^+$ : 331.1475, found: 331.1468.

7. ***N'*-tosyldecanimidamide (4g)** : White solid; m.p. 60-61 °C;  **$^1\text{H}$  NMR (600 MHz,  $\text{CDCl}_3$ )**

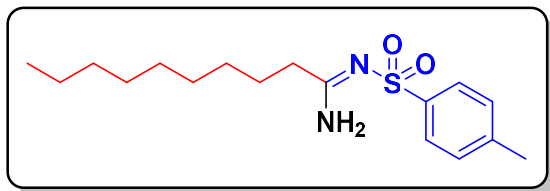

**$\delta$  (ppm)** = 8.05 (br, 1H), 7.82 (d,  $J$  = 7.7 Hz, 2H), 7.28-7.27 (m, 3H), 5.78 (br, 1H), 2.41 (s, 3H), 2.25 (t,  $J$  = 7.5 Hz, 2H), 1.29-1.22 (m, 14H), 0.88 (t,  $J$  = 7.0 Hz, 3H);  **$^{13}\text{C}$**

**NMR (150 MHz,  $\text{CDCl}_3$ )  $\delta$  (ppm)** = 169.02, 142.87, 139.23, 129.28, 126.36, 37.97, 31.81, 29.34, 29.17, 28.80, 26.52, 22.63, 21.49, 14.08; **IR (KBr)**  $\nu$  3394, 3317, 3248, 2961, 2919, 2842, 1641, 1544, 1453, 1271, 1132, 1082, 915, 796, 712  $\text{cm}^{-1}$ ; **HRMS (ESI)**  $m/z$  calcd. for  $[\text{M}+\text{H}]^+$ : 325.1944, found: 325.1945.

8. ***N'*-tosyloctanimidamide (4h)** : White solid; m.p. 70-71 °C;  **$^1\text{H}$  NMR (600 MHz,  $\text{CDCl}_3$ )**

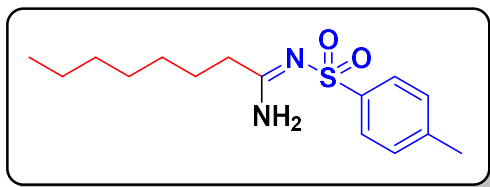

**$\delta$  (ppm)** = 8.05 (br, 1H), 7.83 (d,  $J$  = 8.1 Hz, 2H), 7.3 (d,  $J$  = 7 Hz, 2H), 5.96 (br, 1H), 2.43 (s, 3H), 2.27 (t,  $J$  = 7.5 Hz, 2H), 1.69 (s, 2H), 1.62-1.60 (m, 2H), 1.28-1.20 (m, 6H), 0.88 (t,  $J$

= 7.2 Hz, 3H);  **$^{13}\text{C}$  NMR (150 MHz,  $\text{CDCl}_3$ )  $\delta$  (ppm)** = 169.19, 142.87, 139.22, 129.28, 126.33, 37.91, 31.56, 28.82, 28.73, 26.53, 22.50, 21.48, 14.01; **IR (KBr)**  $\nu$  3388, 3322, 3243, 2913, 2848, 1642, 1541, 1455, 1416, 1271, 1145, 1079, 928, 875, 810  $\text{cm}^{-1}$ ; **HRMS (ESI)**  $m/z$  calcd. for  $[\text{M}+\text{H}]^+$ : 297.1631, found: 297.1628.

9. ***N'*-tosylhexanimidamide (4i)<sup>1</sup>** : Yellow solid; m.p. 70-71 °C;  **$^1\text{H}$  NMR (400 MHz,  $\text{CDCl}_3$ )**

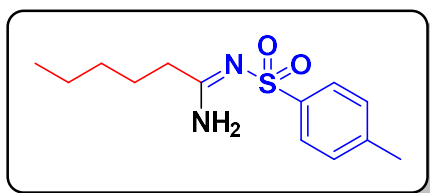

**$\delta$  (ppm)** = 8.05 (br, 1H), 7.82 (d,  $J$  = 8.2 Hz, 2H), 7.29 (d,  $J$  = 6.9 Hz, 2H), 6.02 (br, 1H), 2.43 (s, 3H), 2.26 (t,  $J$  = 7.7 Hz, 2H), 1.65-1.57 (m, 2H), 1.30-1.20 (m, 4H), 0.84 (t,  $J$  = 6.9 Hz, 3H);  **$^{13}\text{C}$**

**NMR (100 MHz,  $\text{CDCl}_3$ )  $\delta$  (ppm)** = 169.28, 142.90, 139.16, 129.27, 126.33, 37.81, 30.91, 26.22, 22.21, 21.48, 13.79; **IR (KBr)**  $\nu$  3372, 3310, 3225, 2910, 2908, 2867, 1640, 1535, 1442, 1138, 1089, 805.

10. 3-cyclohexyl-*N'*-tosylpropanimidamide (4j) : White solid; m.p. 98-99 °C; <sup>1</sup>H NMR

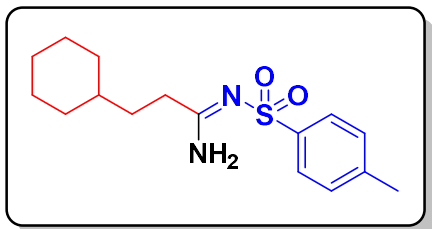

(400 MHz, CDCl<sub>3</sub>)  $\delta$  (ppm) = 8.02 (br, 1H), 7.81 (d,  $J$  = 8.6 Hz, 2H), 7.28 (d,  $J$  = 5.6, 2H), 6.14 (br, 1H), 2.42 (s, 3H), 2.29-2.25 (m, 2H), 1.80 (br, 1H), 1.65-1.60 (m, 4H), 1.50-1.45 (m, 2H), 1.16-1.06 (m, 4H), 0.86-0.80 (m, 2H); <sup>13</sup>C NMR (100 MHz,

CDCl<sub>3</sub>)  $\delta$  (ppm) = 169.75, 142.88, 139.17, 129.28, 126.30, 36.97, 35.39, 33.89, 32.85, 26.35, 26.07, 21.47; IR (KBr)  $\nu$  3443, 3338, 3248, 2912, 2842, 1627, 1530, 1453, 1403, 1264, 1138, 935, 817, 782, 706 cm<sup>-1</sup>; HRMS (ESI)  $m/z$  calcd. for [M+H]<sup>+</sup>: 309.1631, found: 309.1637.

11. 2-(4-chlorophenyl)-*N'*-tosylacetimidamide (4k) : White solid; m.p. 123-124 °C; <sup>1</sup>H

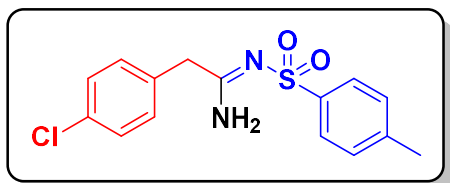

NMR (400 MHz, CDCl<sub>3</sub>)  $\delta$  (ppm) = 8.07 (br, 1H), 7.78 (d,  $J$  = 8.2 Hz, 2H), 7.31-7.26 (m, 4H), 7.15 (d,  $J$  = 8.2 Hz, 2H), 5.75 (br, 1H), 3.59 (s, 2H), 2.42 (s, 3H); <sup>13</sup>C NMR (100 MHz, CDCl<sub>3</sub>)  $\delta$  (ppm) =

166.56, 143.17, 138.88, 134.06, 131.89, 130.80, 129.37, 129.31, 126.37, 43.09, 21.51; IR (KBr)  $\nu$  3365, 3235, 1648, 1559, 1445, 1370, 1269, 1145, 1137, 860, 769, 550, 525 cm<sup>-1</sup>; HRMS (ESI)  $m/z$  calcd. for [M+H]<sup>+</sup>: 323.0616, found: 323.0612.

12. 2-(4-bromophenyl)-*N'*-tosylacetimidamide (4l)<sup>1</sup> : White solid; m.p. 176-177 °C; <sup>1</sup>H

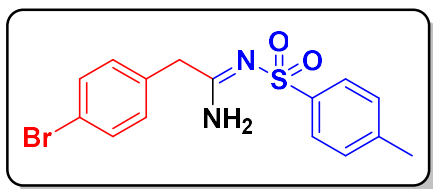

NMR (400 MHz, CDCl<sub>3</sub>)  $\delta$  (ppm) = 8.09 (br, 1H), 7.8 (d,  $J$  = 8.2 Hz, 2H), 7.48 (d,  $J$  = 8.2 Hz, 2H), 7.29 (d,  $J$  = 8.2 Hz, 2H), 7.1 (d,  $J$  = 8.2 Hz, 2H), 5.63 (br, 1H), 3.59 (s, 2H), 2.43 (s, 3H); <sup>13</sup>C NMR (100

MHz, CDCl<sub>3</sub>)  $\delta$  (ppm) = 166.28, 143.18, 138.90, 132.36, 132.33, 131.17, 129.38, 126.43, 122.24, 43.23, 21.53; IR (KBr)  $\nu$  3370, 3215, 1654, 1578, 1425, 1350, 1289, 1151, 1127, 854, 780, 550, 514 cm<sup>-1</sup>.



13. 2-(4-(*tert*-butyl)phenyl)-*N'*-(phenylsulfonyl)acetimidamide (**4m**) : White solid; m.p.

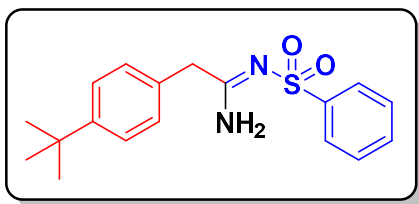

82-83 °C;  $^1\text{H NMR}$  (400 MHz,  $\text{CDCl}_3$ )  $\delta$  (ppm) = 8.14 (br, 1H), 7.96 (d,  $J = 7.3$  Hz, 2H), 7.60-7.56 (m, 1H), 7.53-7.50 (m, 2H), 7.39 (d,  $J = 8.2$  Hz, 2H), 7.17 (d,  $J = 8.2$  Hz, 2H), 5.75 (br, 1H), 3.66 (s, 2H),

1.33 (s, 9H);  $^{13}\text{C NMR}$  (100 MHz,  $\text{CDCl}_3$ )  $\delta$  (ppm) = 167.81, 151.27, 142.00, 132.28, 129.90, 129.40, 128.73, 126.37, 126.25, 43.18, 34.56, 31.23; IR (KBr)  $\nu$  3352, 3206, 2954, 2326, 2172, 1655, 1550, 1278, 1138, 1090, 943, 810  $\text{cm}^{-1}$ ; HRMS (ESI)  $m/z$  calcd. for  $[\text{M}+\text{H}]^+$ : 331.1475, found: 331.1477.

14. *N'*-((4-nitrophenyl)sulfonyl)octanimidamide (**4n**) : White solid; m.p. 60-61 °C;  $^1\text{H}$

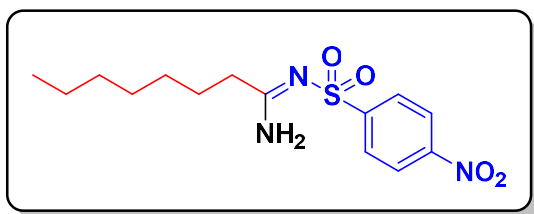

NMR (400 MHz,  $\text{CDCl}_3$ )  $\delta$  (ppm) = 8.34 (d,  $J = 8.6$  Hz, 2H), 8.12 (d,  $J = 9$  Hz, 2H), 6.31 (br, 1H), 2.31 (t,  $J = 7.5$  Hz, 2H), 1.85 (br, 1H), 1.62-1.59 (m, 2H), 1.25-1.20 (m, 8H), 0.85 (t,  $J = 6.9$  Hz, 3H);  $^{13}\text{C NMR}$  (100

MHz,  $\text{CDCl}_3$ )  $\delta$  (ppm) = 170.55, 149.73, 147.73, 127.60, 123.98, 37.83, 31.51, 28.74, 28.71, 26.43, 22.45, 13.94; IR (KBr)  $\nu$  3352, 3206, 2954, 2326, 2172, 1655, 1550, 1278, 1138, 1090, 943, 810  $\text{cm}^{-1}$ ; HRMS (ESI)  $m/z$  calcd. for  $[\text{M}+\text{H}]^+$ : 328.1326, found: 328.1322.

15. *N'*-(naphthalen-2-ylsulfonyl)-2-(*p*-tolyl)acetimidamide (**4o**) : Light Brown solid; m.p.

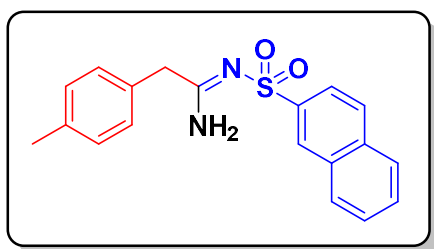

110-111 °C;  $^1\text{H NMR}$  (400 MHz,  $\text{CDCl}_3$ )  $\delta$  (ppm) = 8.48 (s, 1H), 8.18 (br, 1H), 7.96-7.92 (m, 4H), 7.65-7.60 (m, 2H), 7.15-7.09 (m, 4H), 5.76 (br, 1H), 3.64 (s, 2H), 2.33 (s, 3H);  $^{13}\text{C NMR}$  (100

MHz,  $\text{CDCl}_3$ )  $\delta$  (ppm) = 167.89, 138.87, 138.00, 129.97, 129.56, 129.25, 129.04, 128.45, 127.81, 127.81, 127.23, 127.12, 122.30, 43.23, 21.05; IR (KBr)  $\nu$  3369, 3324, 3247, 2965, 2984, 2845, 1658, 1524, 1306, 1287, 1108, 813  $\text{cm}^{-1}$ ; HRMS (ESI)  $m/z$  calcd. for  $[\text{M}+\text{H}]^+$ : 339.1162, found: 339.1160.

16. 2-(4-(*tert*-butyl)phenyl)-*N'*-(naphthalen-2-ylsulfonyl)acetimidamide (4p) : Light

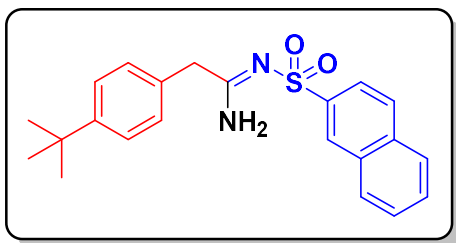

Brown solid; m.p. 115-116 °C;  $^1\text{H NMR}$  (400 MHz,  $\text{CDCl}_3$ )  $\delta$  (ppm) = 8.49 (s, 1H), 8.19 (br, 1H), 7.96-7.90 (m, 4H), 7.65-7.58 (m, 2H), 7.36 (d,  $J = 7.7$  Hz, 2H), 7.15 (d,  $J = 7.7$  Hz, 2H), 5.73 (br, 1H), 3.66 (s, 2H), 1.31 (s, 9H);  $^{13}\text{C NMR}$  (100

MHz,  $\text{CDCl}_3$ )  $\delta$  (ppm) = 167.83, 151.29, 138.90, 134.74, 132.08, 129.89, 129.43, 129.40, 129.27, 129.05, 128.46, 127.83, 127.24, 127.15, 126.26, 122.33, 43.20, 34.56, 31.23; IR (KBr)  $\nu$  3408, 3303, 3254, 2954, 2926, 2870, 1641, 1544, 1502, 1389, 1250, 1166, 1118, 1068, 1013, 935, 817  $\text{cm}^{-1}$ ; HRMS (ESI)  $m/z$  calcd. for  $[\text{M}+\text{H}]^+$ : 381.1631, found: 381.1624.

17. 3-cyclohexyl-*N'*-(phenylsulfonyl)propanimidamide (4q) : White solid; m.p. 80-81 °C;

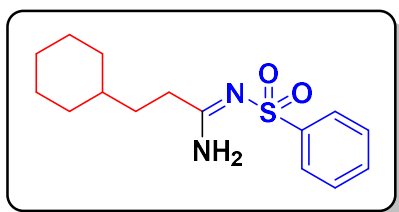

$^1\text{H NMR}$  (400 MHz,  $\text{CDCl}_3$ )  $\delta$  (ppm) = 8.07 (br, 1H), 7.93 (d,  $J = 6.9$  Hz, 2H), 7.57-7.47 (m, 3H), 6.04 (br, 1H), 2.34-2.27 (m, 2H), 1.77 (br, 1H), 1.65-1.60 (m, 4H), 1.52-1.46 (m, 2H), 1.14-1.09 (m, 4H), 0.89-0.79 (m, 2H);  $^{13}\text{C NMR}$  (100 MHz,  $\text{CDCl}_3$ )  $\delta$  (ppm) =

169.89, 142.05, 132.22, 128.69, 126.29, 36.98, 35.47, 33.86, 32.67, 26.35, 26.07; IR (KBr)  $\nu$  3436, 3324, 2912, 2836, 1613, 1522, 1439, 1411, 1271, 1138, 1082, 929, 789  $\text{cm}^{-1}$ ; HRMS (ESI)  $m/z$  calcd. for  $[\text{M}+\text{H}]^+$ : 295.1475, found: 295.1471.

18. *N'*-(phenylsulfonyl)hexanimidamide (4r) : Yellow solid; m.p. 52-53 °C;  $^1\text{H NMR}$  (400

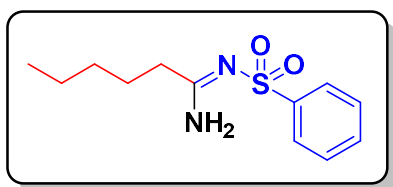

MHz,  $\text{CDCl}_3$ )  $\delta$  (ppm) = 8.03 (br, 1H), 7.92 (d,  $J = 7.3$  Hz, 2H), 7.56-7.46 (m, 3H), 6.28 (br, 1H), 2.25 (t,  $J = 7.7$  Hz, 2H), 1.62-1.55 (m, 2H), 1.27-1.17 (m, 4H), 0.81 (t,  $J = 6.9$  Hz, 3H);  $^{13}\text{C NMR}$  (100 MHz,  $\text{CDCl}_3$ )  $\delta$  (ppm) = 169.82, 142.02, 132.20, 128.67, 126.20, 37.72,

30.86, 26.21, 22.16, 13.78; IR (KBr)  $\nu$  3443, 3324, 3234, 3059, 2954, 2918, 2864, 1613, 1530, 1417, 1264, 1146, 1090, 929, 789, 754  $\text{cm}^{-1}$ ; HRMS (ESI)  $m/z$  calcd. for  $[\text{M}+\text{H}]^+$ : 255.1162, found: 255.1158.

19. *N'*-(phenylsulfonyl)-2-(*p*-tolyl)acetimidamide (**4s**) : White solid; m.p. 76-77 °C; <sup>1</sup>H

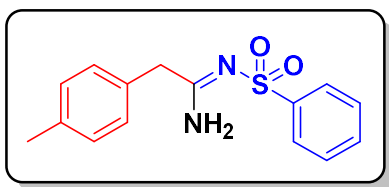

NMR (400 MHz, CDCl<sub>3</sub>) δ (ppm) = 8.11 (br, 1H), 7.94 (d, *J* = 7.3 Hz, 2H), 7.59-7.48 (m, 3H), 7.17-7.09 (m, 4H), 5.71 (br, 1H), 3.63 (s, 2H), 2.35 (s, 3H); <sup>13</sup>C

NMR (100 MHz, CDCl<sub>3</sub>) δ (ppm) = 167.81, 141.99, 138.01, 132.29, 129.98, 129.92, 129.56, 128.73, 126.37, 43.27, 21.06; IR (KBr) ν 3443, 3324, 2912, 2856, 1606, 1522, 1439, 1375, 1264, 1146, 1068, 908, 852, 789, 754, 712 cm<sup>-1</sup>; HRMS (ESI) *m/z* calcd. for [M+H]<sup>+</sup>: 289.1005, found: 289.1001.

20. *N'*-((4-nitrophenyl)sulfonyl)hexanimidamide (**4t**) : Yellow solid; m.p. 55-56 °C; <sup>1</sup>H

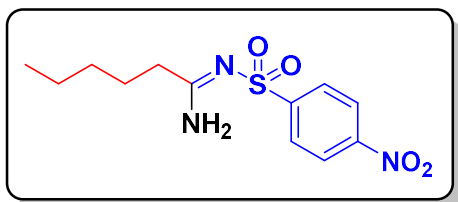

NMR (400 MHz, CDCl<sub>3</sub>) δ (ppm) = 8.33 (d, *J* = 8.6 Hz, 2H), 8.11 (d, *J* = 8.6 Hz, 2H), 6.27 (br, 1H), 2.3 (t, *J* = 7.7 Hz, 2H), 1.85 (br, 1H), 1.65-1.57 (m, 2H), 1.27-1.22 (m, 4H), 0.83 (t, *J* = 6.9 Hz, 3H); <sup>13</sup>C NMR (100 MHz, CDCl<sub>3</sub>) δ (ppm) =

170.49, 149.75, 147.72, 127.62, 123.98, 37.83, 30.88, 26.09, 22.14, 13.78; IR (KBr) ν 3388, 3322, 3243, 3104, 2933, 2854, 1641, 1528, 1436, 1344, 1271, 1140, 1079, 961, 855, 803, 684; HRMS (ESI) *m/z* calcd. for [M+H]<sup>+</sup>: 300.1013, found: 300.1009.

21. 2-(4-(*tert*-butyl)phenyl)-*N'*-(*o*-tolylsulfonyl)acetimidamide (**4u**) : White solid; m.p. 82-

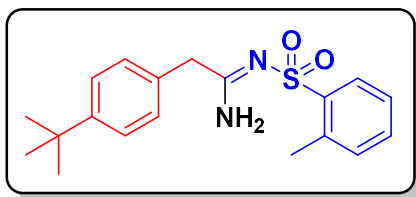

83 °C; <sup>1</sup>H NMR (500 MHz, CDCl<sub>3</sub>) δ (ppm) = 8.07 (br, 1H), 8.03 (d, *J* = 7.3 Hz, 1H), 7.46-7.43 (m, 1H), 7.38 (d, *J* = 8.2 Hz, 2H), 7.30 (d, *J* = 7.5 Hz, 2H), 7.15 (d, *J* = 8.2 Hz, 2H), 5.73 (br, 1H), 3.65 (s, 2H), 2.67 (s,

3H), 1.32 (s, 9H); <sup>13</sup>C NMR (125 MHz, CDCl<sub>3</sub>) δ (ppm) = 167.73, 151.29, 139.75, 137.64, 132.78, 132.24, 129.42, 127.79, 126.25, 125.79, 42.95, 34.56, 31.23, 20.29; IR (KBr) ν 3394, 3317, 3248, 2961, 2891, 2864, 1655, 1558, 1453, 1411, 1250, 1110, 1054, 971, 817, 740 cm<sup>-1</sup>; HRMS (ESI) *m/z* calcd. for [M+H]<sup>+</sup>: 345.1631, found: 345.1628.

22. 2-phenyl-*N'*-(phenylsulfonyl)acetimidamide (**4v**) : White solid; m.p. 86-87 °C; <sup>1</sup>H

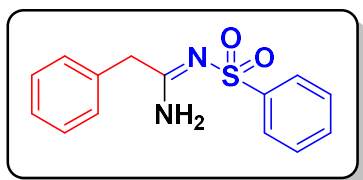

NMR (600 MHz, CDCl<sub>3</sub>) δ (ppm) = 8.11 (br, 1H), 7.93

(d,  $J = 7.7$  Hz, 2H), 7.57-7.55 (m, 1H), 7.50-7.48 (m, 2H), 7.36-7.32 (m, 3H), 7.22 (d,  $J = 7$  Hz, 2H), 5.79 (br, 1H), 3.66 (s, 2H);  $^{13}\text{C}$  NMR (150 MHz,  $\text{CDCl}_3$ )  $\delta$ (ppm) = 167.56, 141.90, 133.18, 132.32, 129.59, 129.26, 128.74, 128.10, 126.34; IR (KBr)  $\nu$  3436, 3324, 1627, 1530, 1389, 1264, 1138, 1082, 929, 775, 740  $\text{cm}^{-1}$ ; HRMS (ESI)  $m/z$  calcd. for  $[\text{M}+\text{H}]^+$ : 275.0849, found: 275.0843.

23. 2-phenyl- $N'$ -(*o*-tolylsulfonyl)acetimidamide (4w) : White solid; m.p. 70-71  $^\circ\text{C}$ ;  $^1\text{H}$

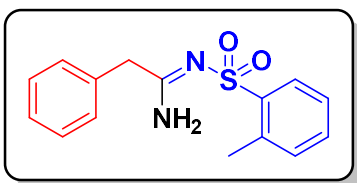

NMR (400 MHz,  $\text{CDCl}_3$ )  $\delta$  (ppm) = 7.92 (d,  $J = 7.7$  Hz, 1H), 7.37-7.33 (m, 1H), 7.28-7.19 (m, 5H), 7.14-7.12 (m, 2H), 5.77 (br, 1H), 3.57 (s, 2H), 2.56 (s, 3H), 1.65 (br, 1H);  $^{13}\text{C}$  NMR (100 MHz,  $\text{CDCl}_3$ )  $\delta$  (ppm) = 167.38, 139.86, 137.50, 133.36, 133.33, 132.32, 132.16, 129.53,

129.14, 129.12, 127.96, 127.94, 127.59, 125.69, 43.69, 20.21; IR (KBr)  $\nu$  3450, 3380, 3338, 2933, 1620, 1550, 1446, 1257, 1187, 1124, 817  $\text{cm}^{-1}$ ; HRMS (ESI)  $m/z$  calcd. for  $[\text{M}+\text{H}]^+$ : 289.1005, found: 289.1002.

24.  $N'$ -((4-methoxyphenyl)sulfonyl)-2-phenylacetimidamide (4x) : White solid; m.p. 100-

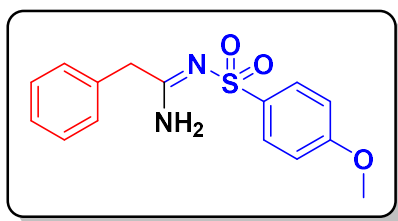

101  $^\circ\text{C}$ ;  $^1\text{H}$  NMR (400 MHz,  $\text{CDCl}_3$ )  $\delta$  (ppm) = 8.06 (br, 1H), 7.85 (d,  $J = 9$  Hz, 2H), 7.36-7.31 (m, 3H), 7.21 (dd,  $J = 1.5$  Hz, 7.5 Hz, 2H), 6.95 (d,  $J = 9$  Hz, 2H), 5.79 (br, 1H), 3.86 (s, 3H), 3.63 (s, 2H);  $^{13}\text{C}$  NMR (100 MHz,  $\text{CDCl}_3$ )  $\delta$  (ppm) = 167.09, 162.61, 133.81,

129.50, 129.14, 128.39, 127.94, 113.87, 55.52, 43.61; IR (KBr)  $\nu$  3401, 3324, 3248, 2933, 1634, 1592, 1488, 1124, 1076, 817  $\text{cm}^{-1}$ ; HRMS (ESI)  $m/z$  calcd. for  $[\text{M}+\text{H}]^+$ : 305.0954, found: 305.0948.

25.  $N'$ -((4-bromophenyl)sulfonyl)-2-phenylacetimidamide (4y) : White solid; m.p. 76-77

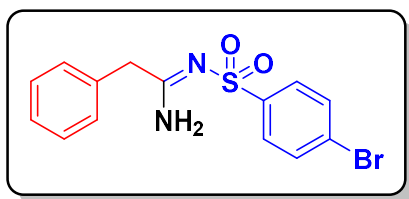

$^\circ\text{C}$ ;  $^1\text{H}$  NMR (400 MHz,  $\text{CDCl}_3$ )  $\delta$  (ppm) = 8.12 (br, 1H), 7.8 (d,  $J = 8.6$  Hz, 2H), 7.63 (d,  $J = 8.6$  Hz, 2H), 7.38-7.35 (m, 3H), 7.24-7.22 (m, 2H), 5.65 (br, 1H), 3.67 (s, 2H);  $^{13}\text{C}$  NMR (100 MHz,  $\text{CDCl}_3$ )  $\delta$  (ppm) =

167.62, 141.04, 132.90, 131.99, 129.67, 129.40, 128.30, 128.05, 127.21, 43.75; IR (KBr)

$\nu$  3401, 3303, 3240, 2905, 2850, 1648, 1550, 1425, 1348, 1257, 1160, 1068, 957, 796, 601  $\text{cm}^{-1}$ ; **HRMS (ESI) m/z** calcd. for  $[\text{M}+\text{H}]^+$ : 352.9954, found: 352.9948.

**26. 2-phenyl-*N'*-(*m*-tolylsulfonyl)acetimidamide (4z)** : White solid; m.p. 85-86 °C;  **$^1\text{H}$**

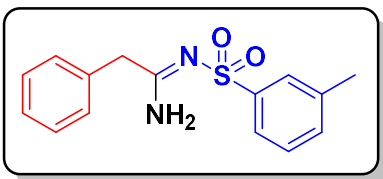

**NMR (500 MHz,  $\text{CDCl}_3$ )  $\delta$  (ppm)** = 8.15 (br, 1H), 7.74-7.3 (m, 2H), 7.38-7.22 (m, 5H), 7.23 (dd,  $J$  = 1.5 Hz, 7.8 Hz, 2H), 5.74 (br, 1H), 3.68 (s, 2H), 2.42 (s, 3H);  **$^{13}\text{C}$  NMR (125 MHz,  $\text{CDCl}_3$ )  $\delta$  (ppm)** = 167.41,

141.62, 138.94, 133.19, 133.10, 129.67, 129.30, 128.64, 128.17, 126.82, 123.48, 43.63, 21.33; **IR (KBr)  $\nu$**  3366, 3240, 3065, 3017, 2912, 2850, 1648, 1550, 1417, 1271, 1138, 1090, 963, 859, 803  $\text{cm}^{-1}$ ; **HRMS (ESI) m/z** calcd. for  $[\text{M}+\text{H}]^+$ : 289.1005, found: 289.1009.

### References:

1. J. Kim, S. Y. Lee, J. Lee, Y. Do and S. Chang, *J. Org. Chem.*, 2008, **73**, 9454–9457.

3.  $^1\text{H}$  and  $^{13}\text{C}$  NMR spectra:

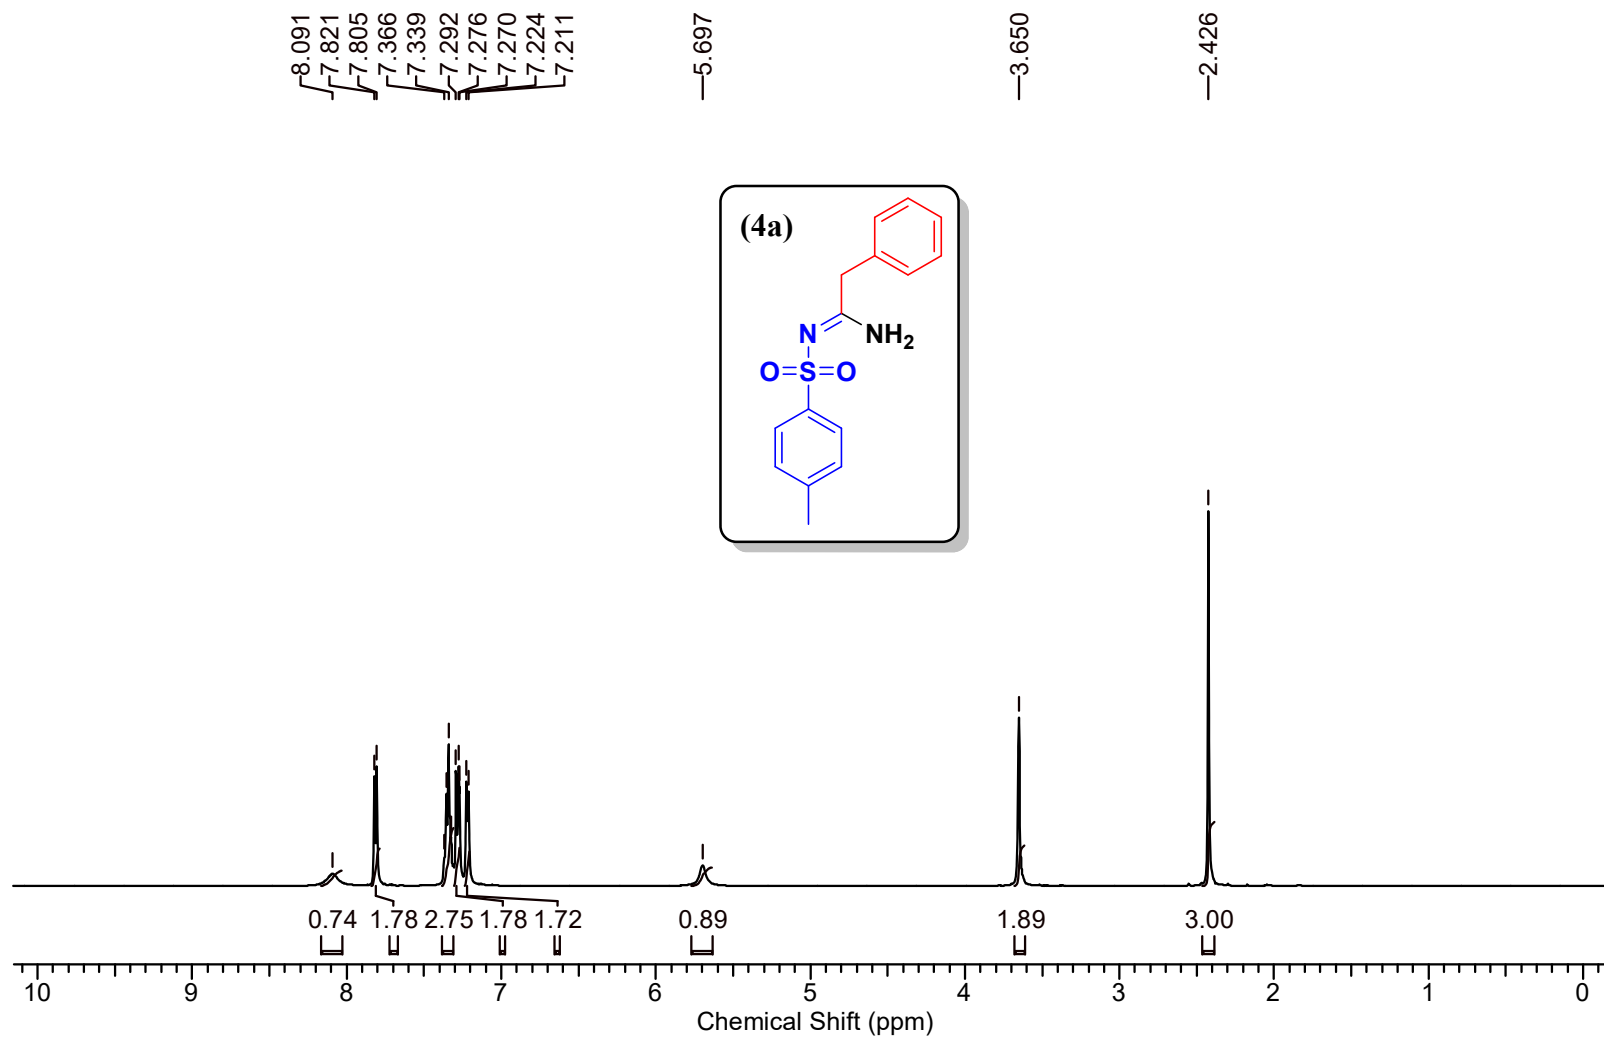

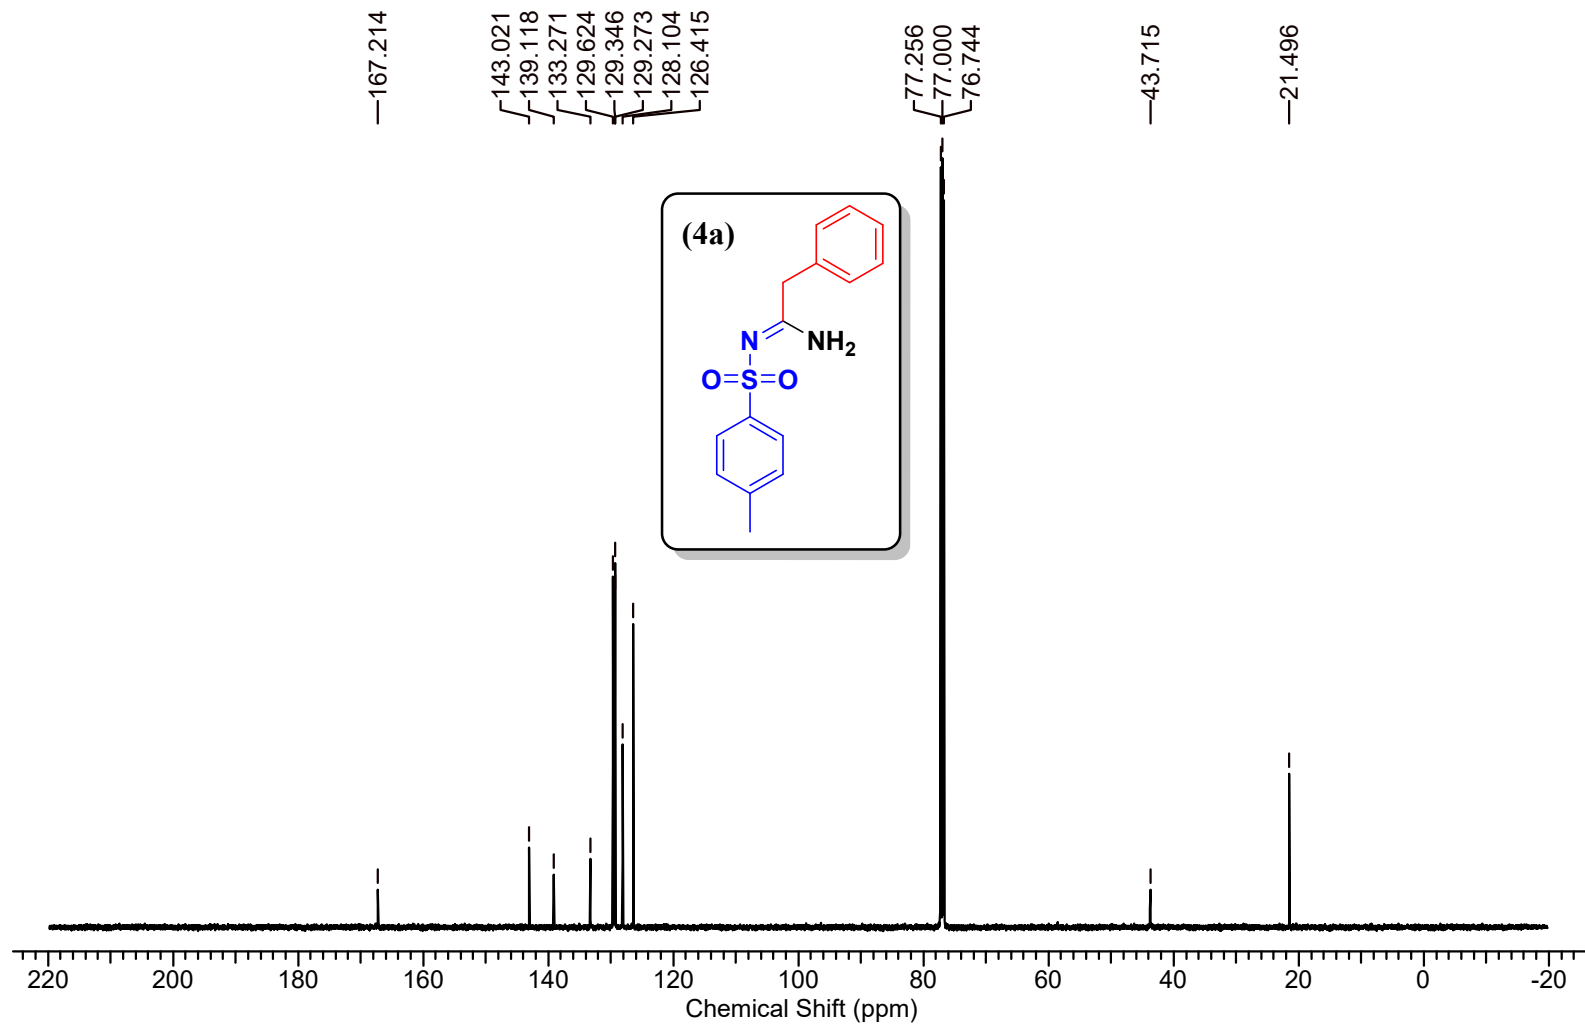

8.799  
8.780  
8.422  
8.400  
7.934  
7.914  
7.833  
7.813  
7.534  
7.516  
7.496  
7.334  
7.313  
7.293  
7.270  
7.166

2.416

1.604

1.263

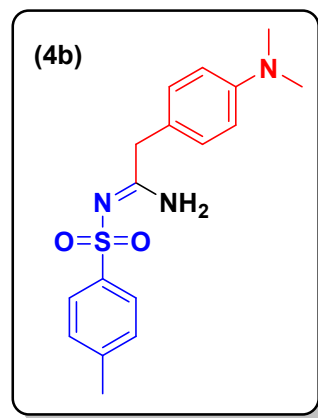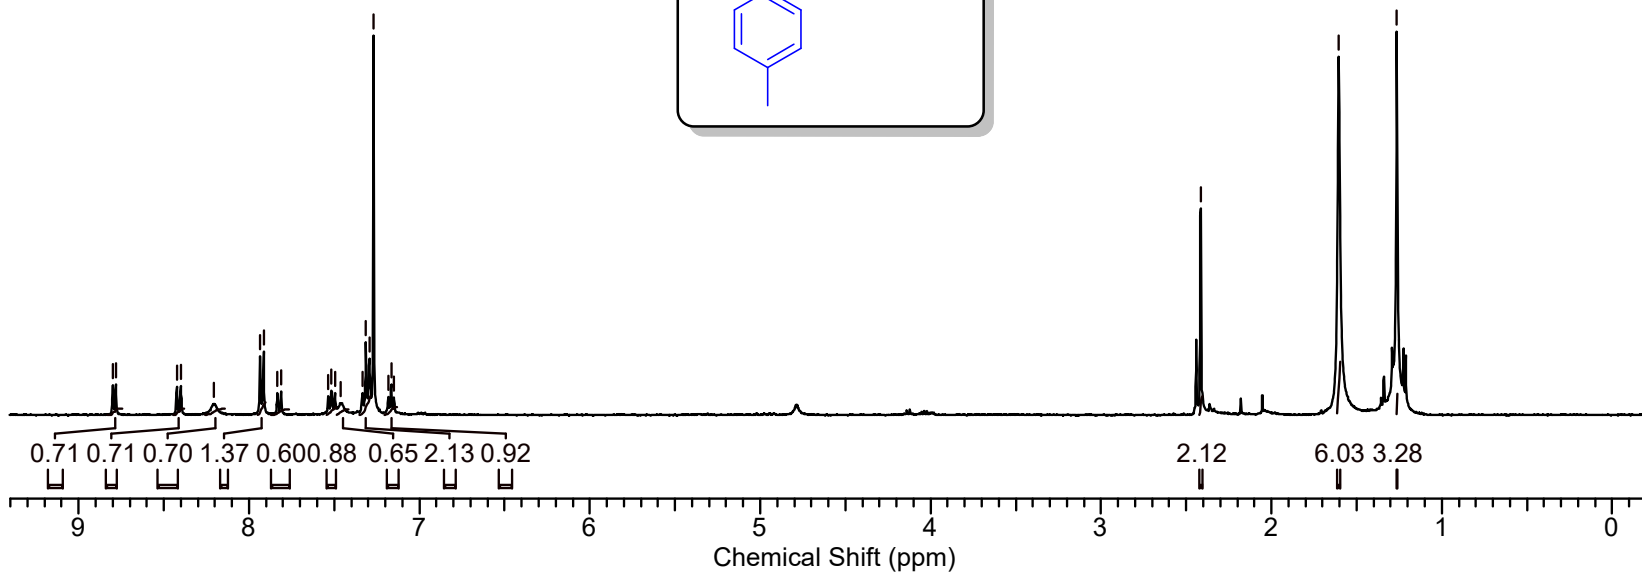



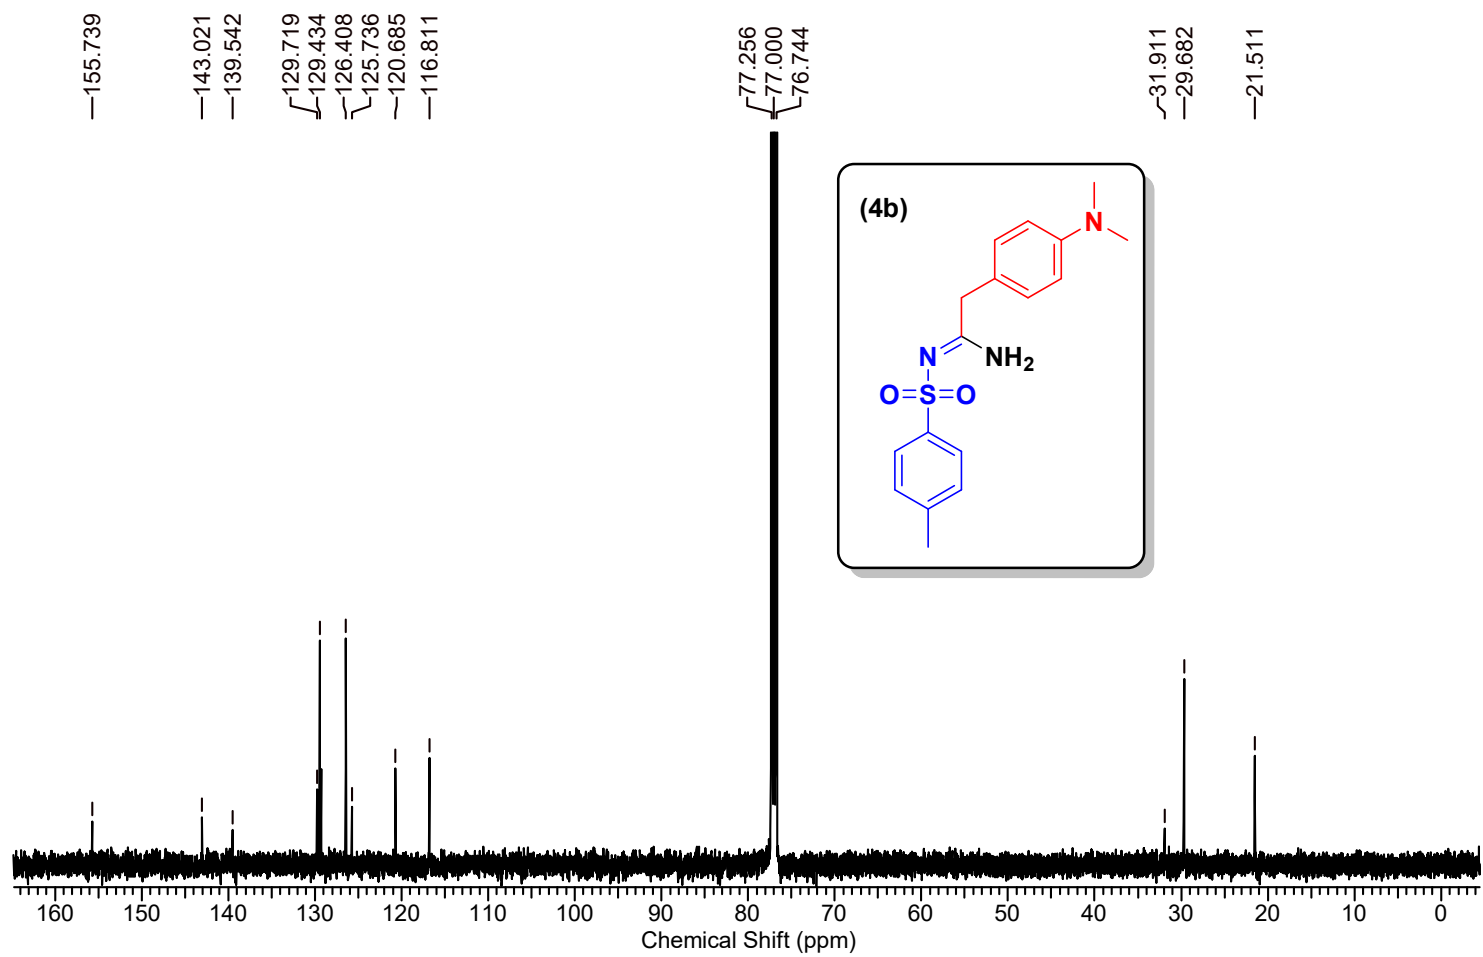

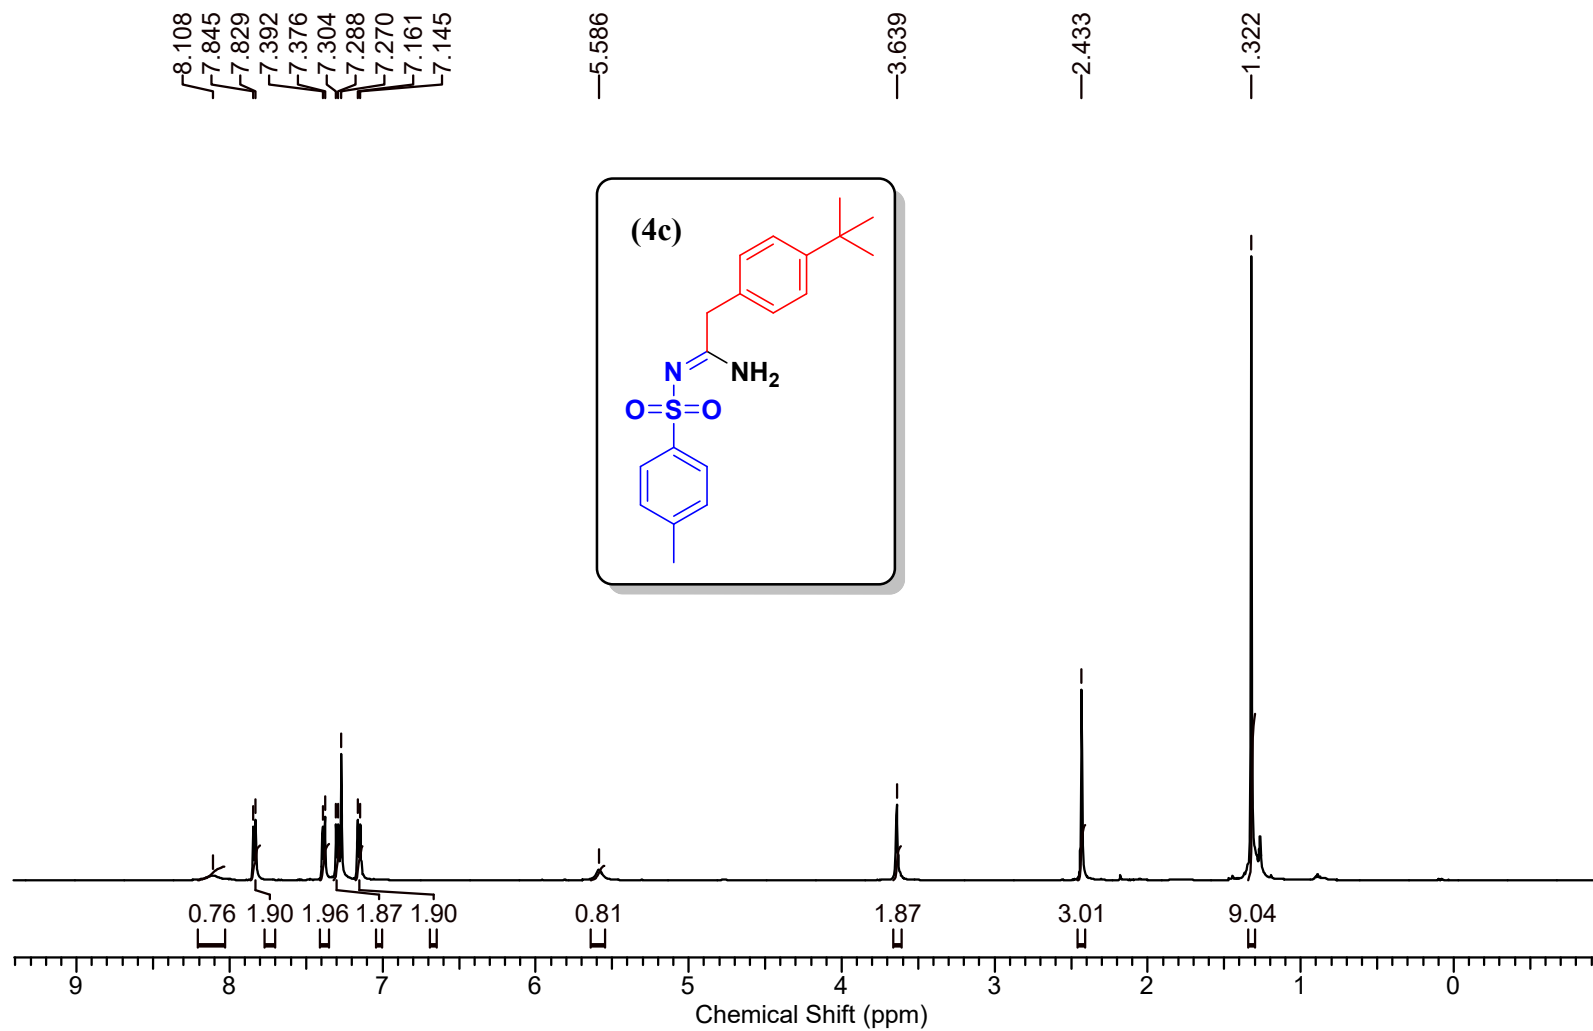

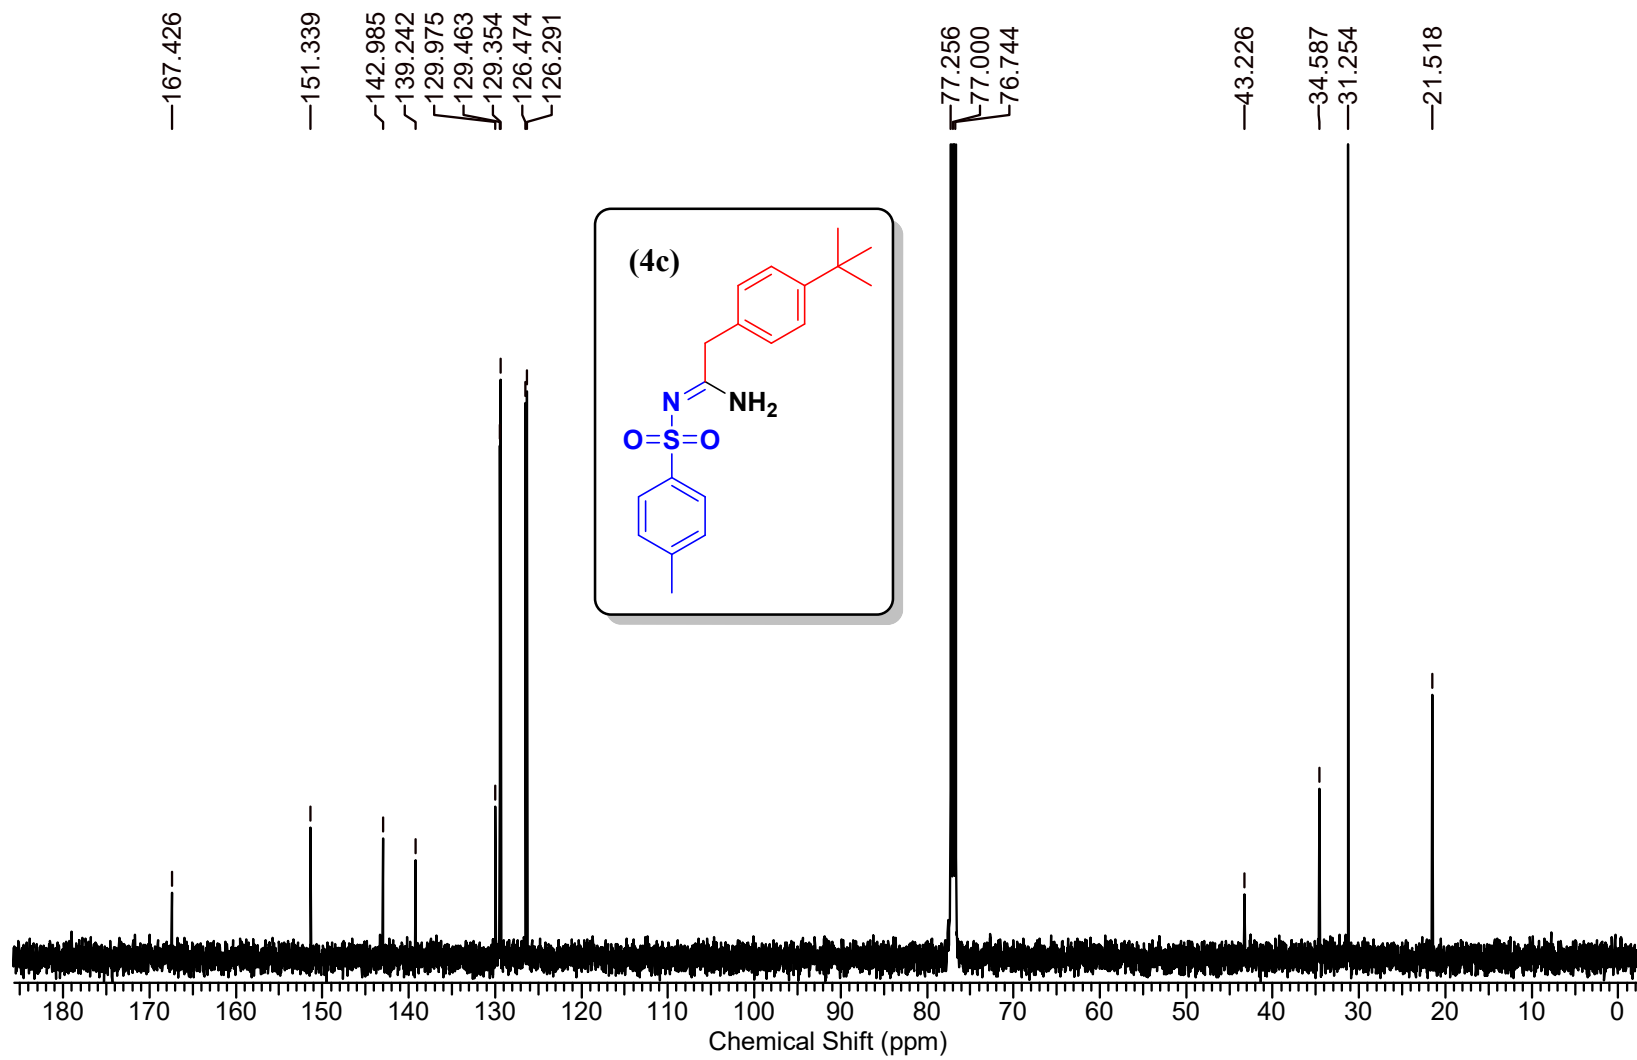

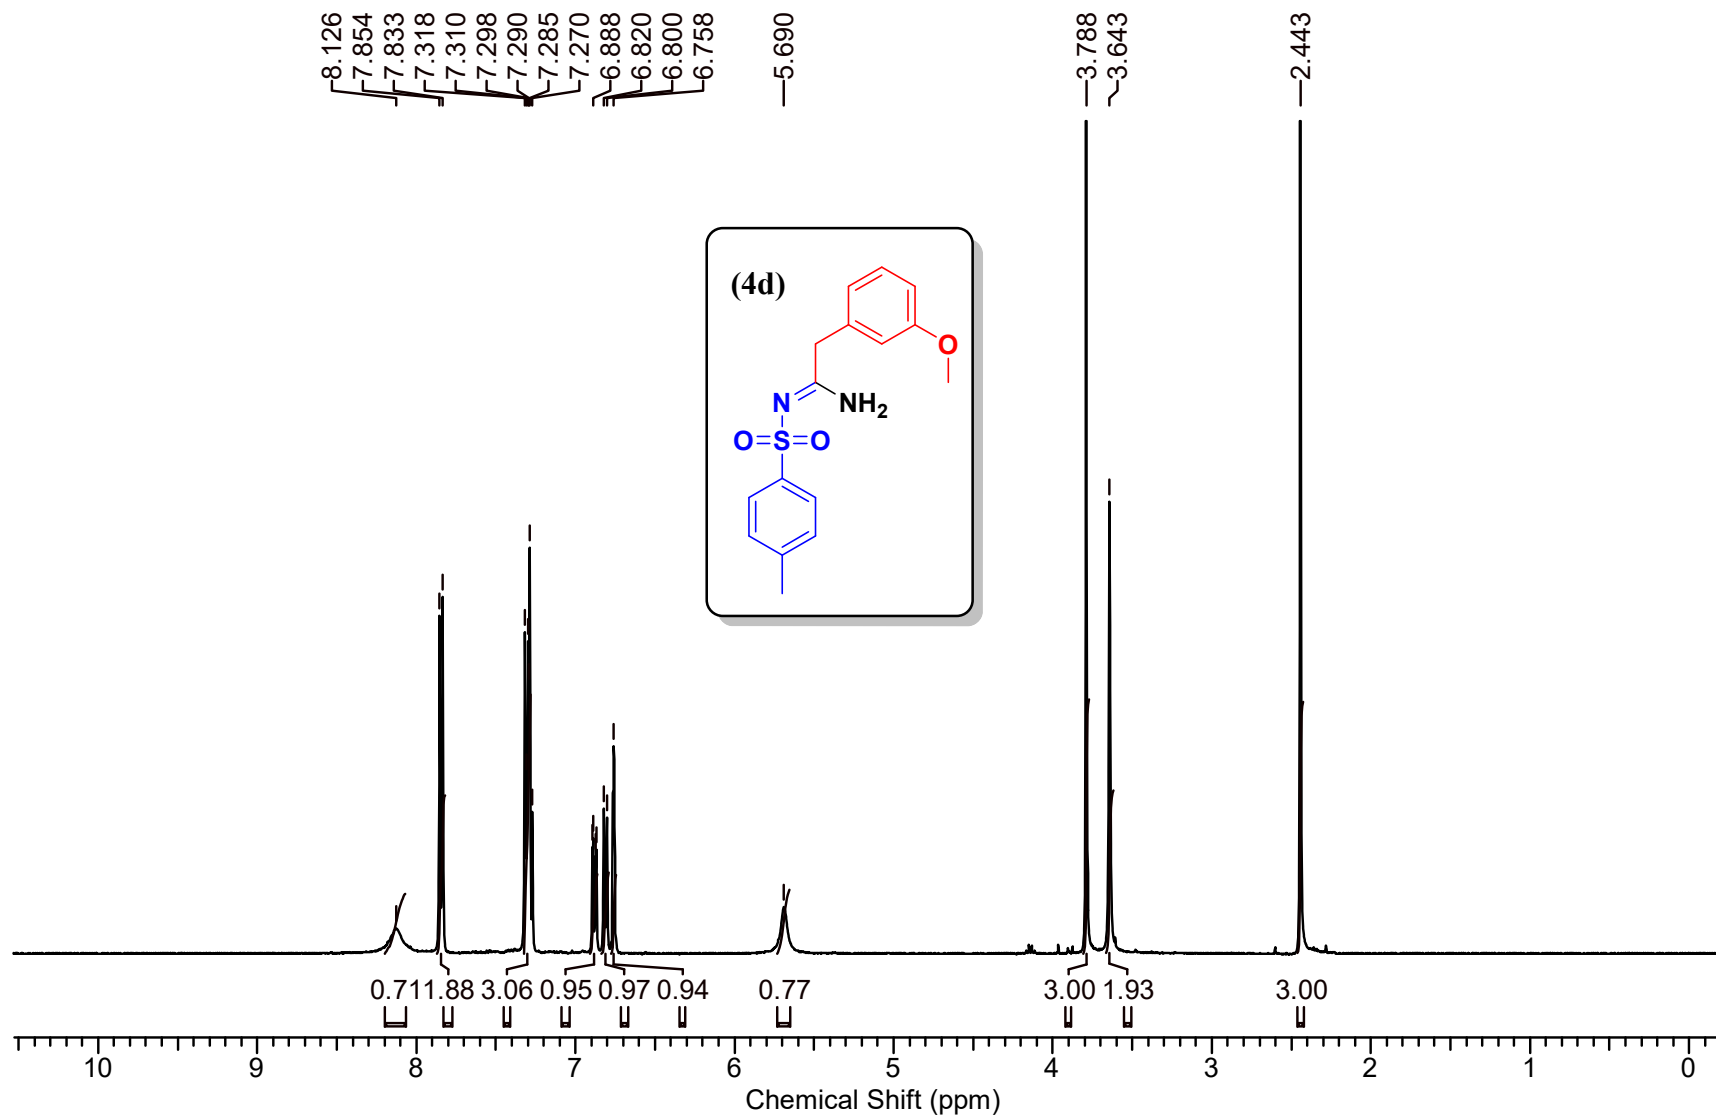

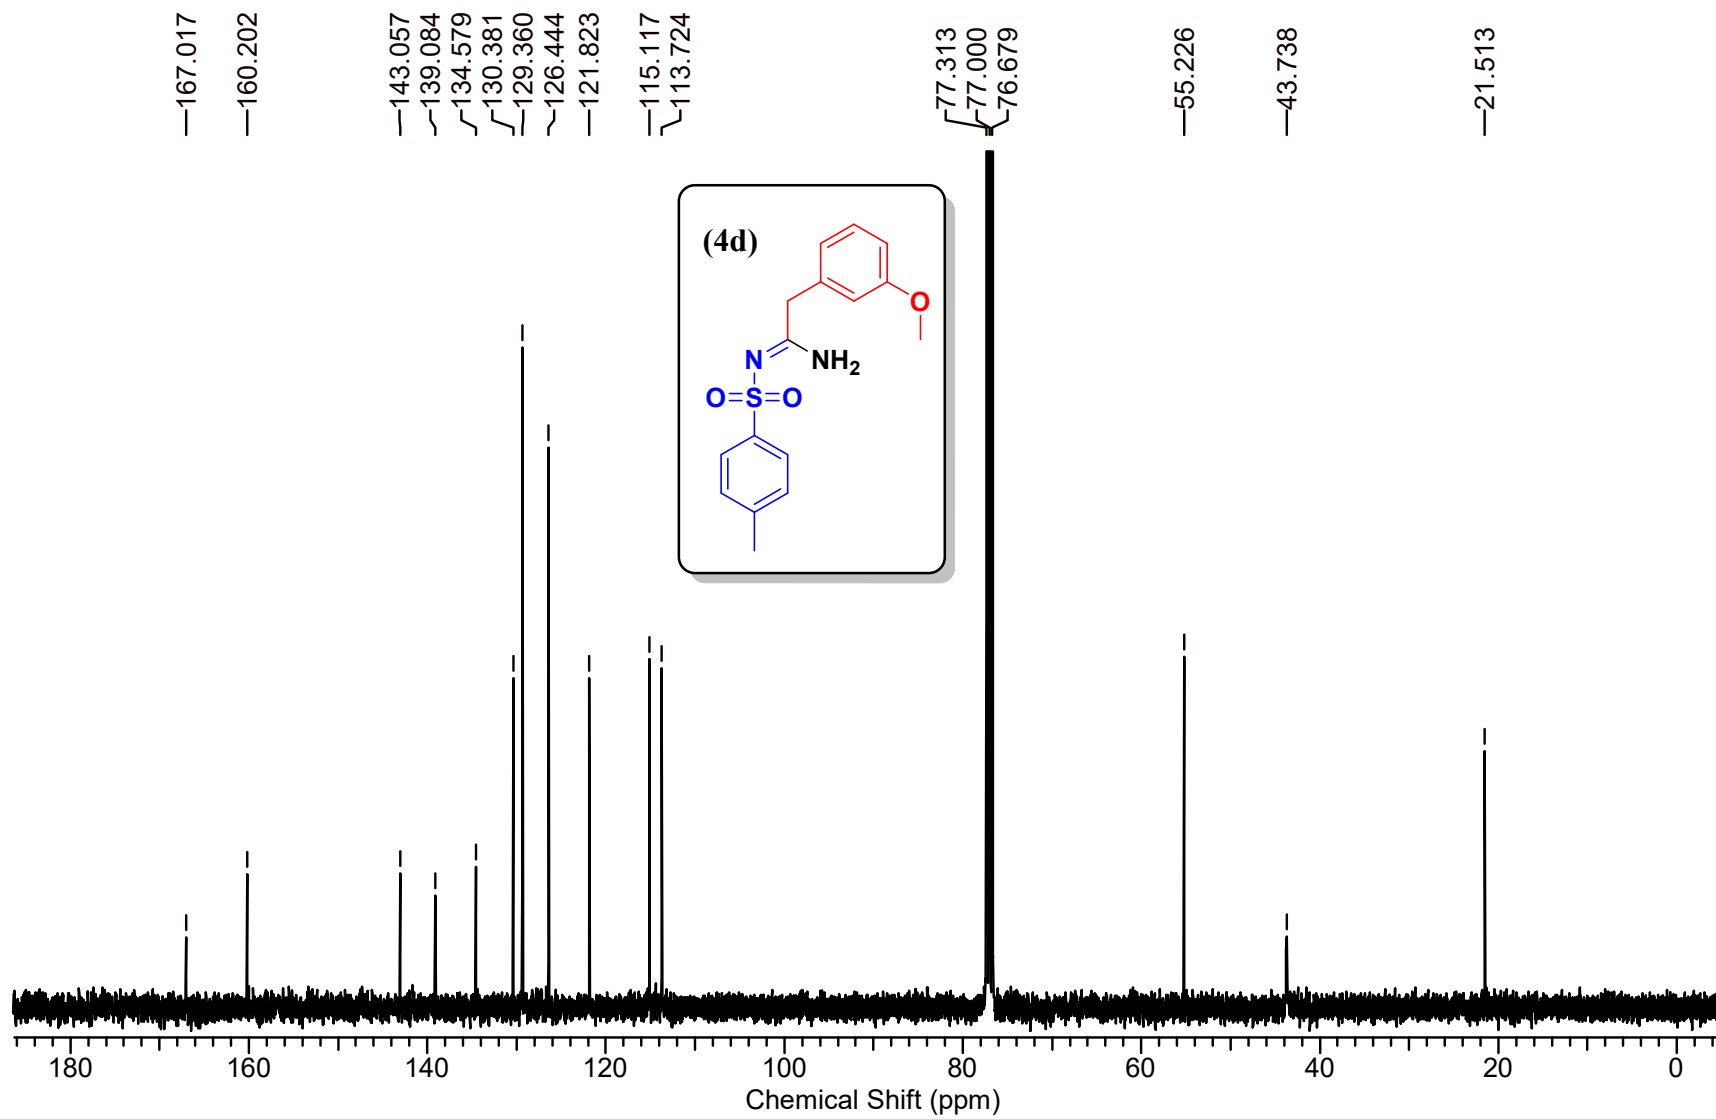

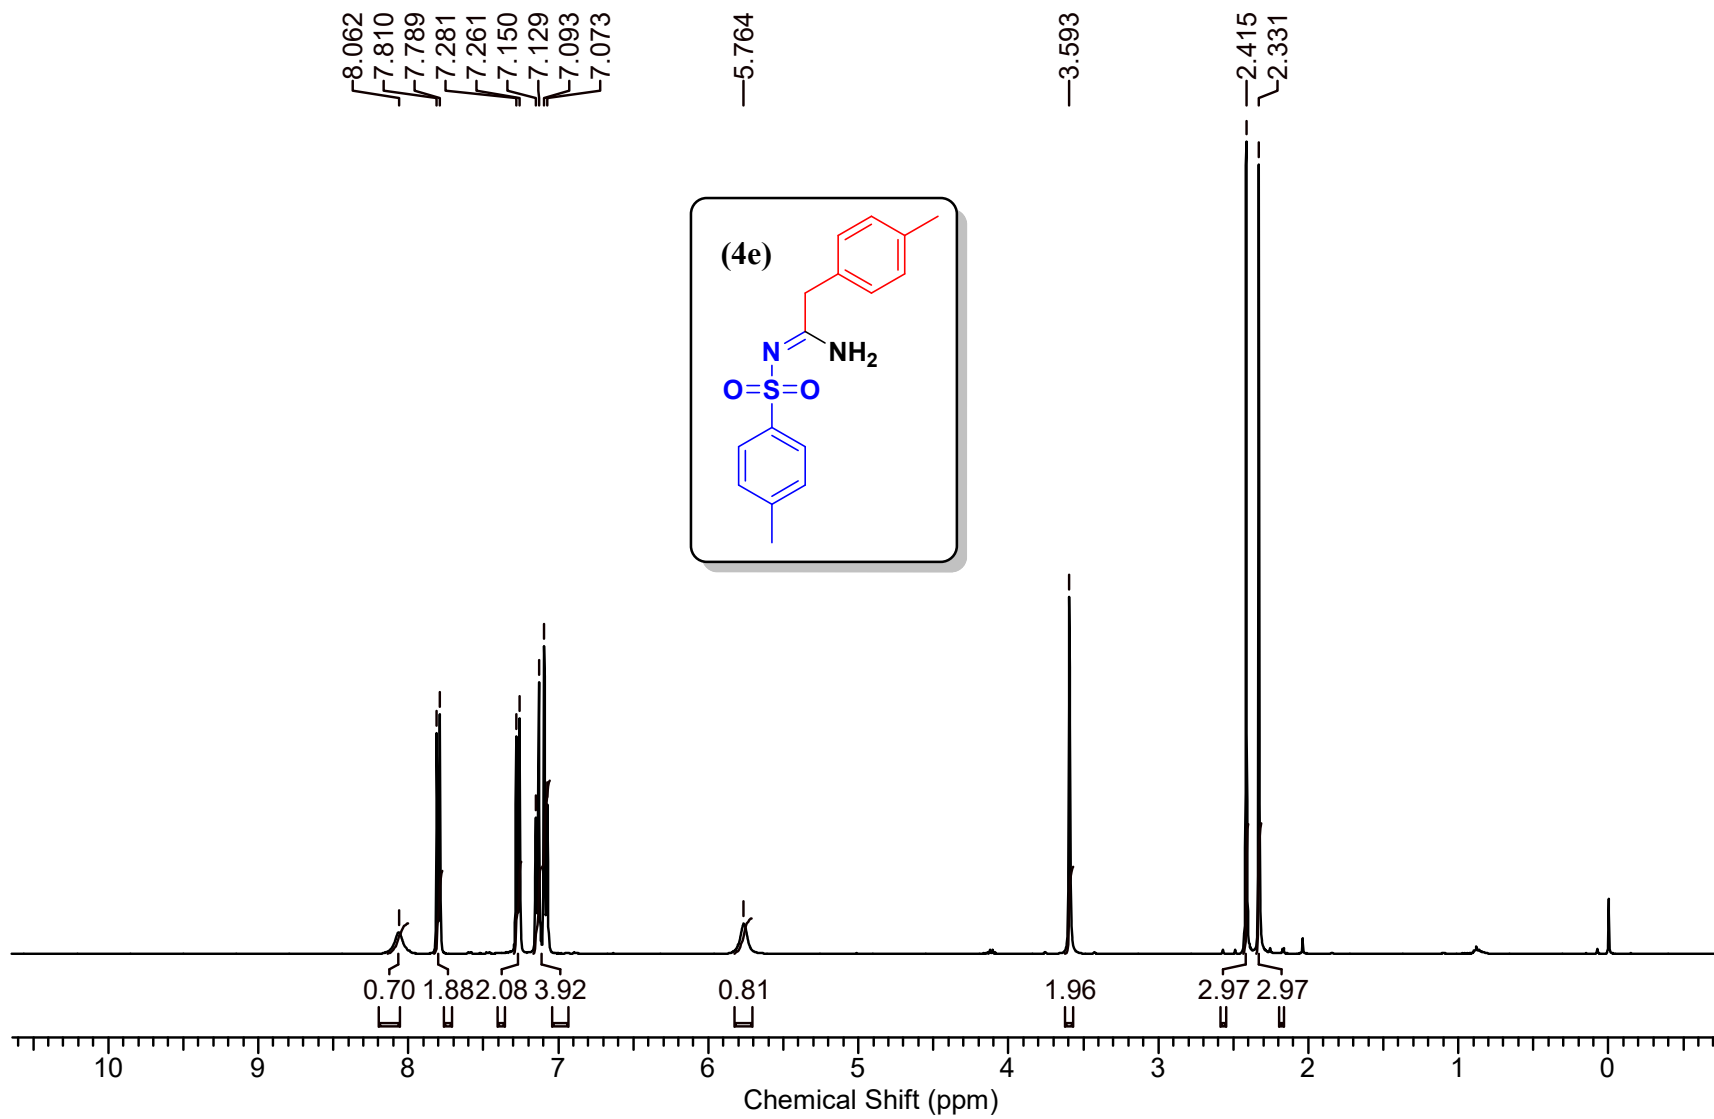

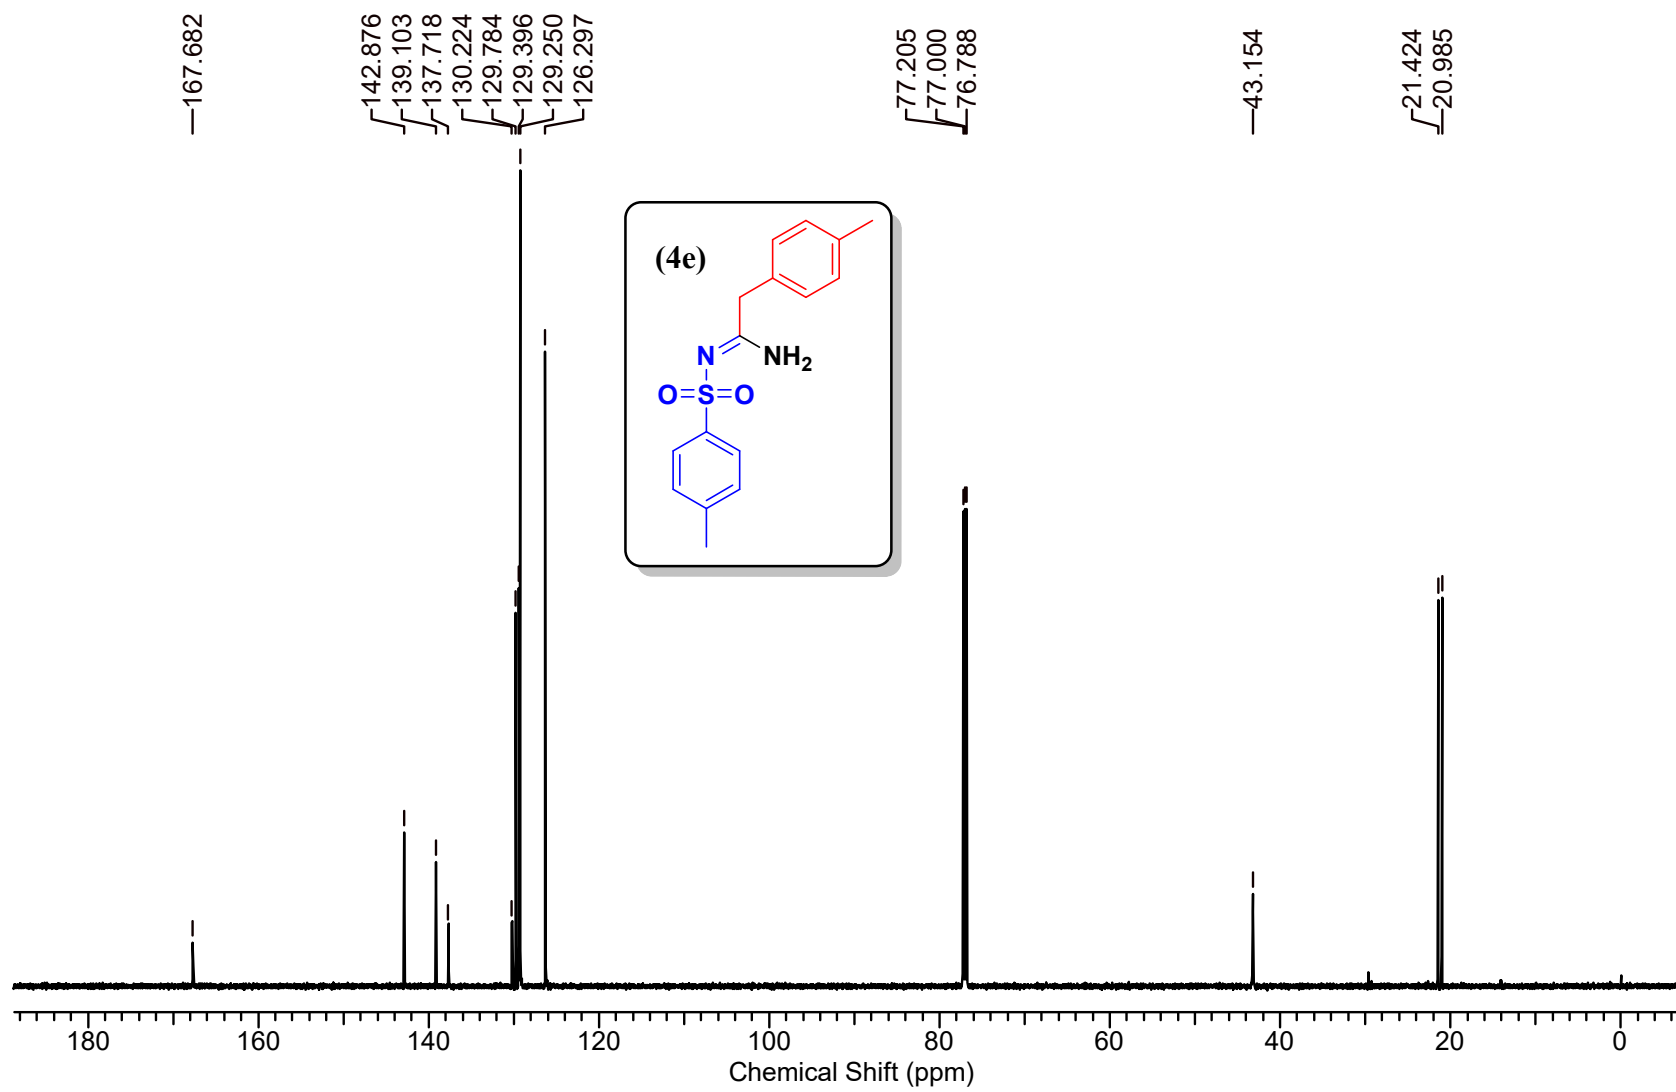

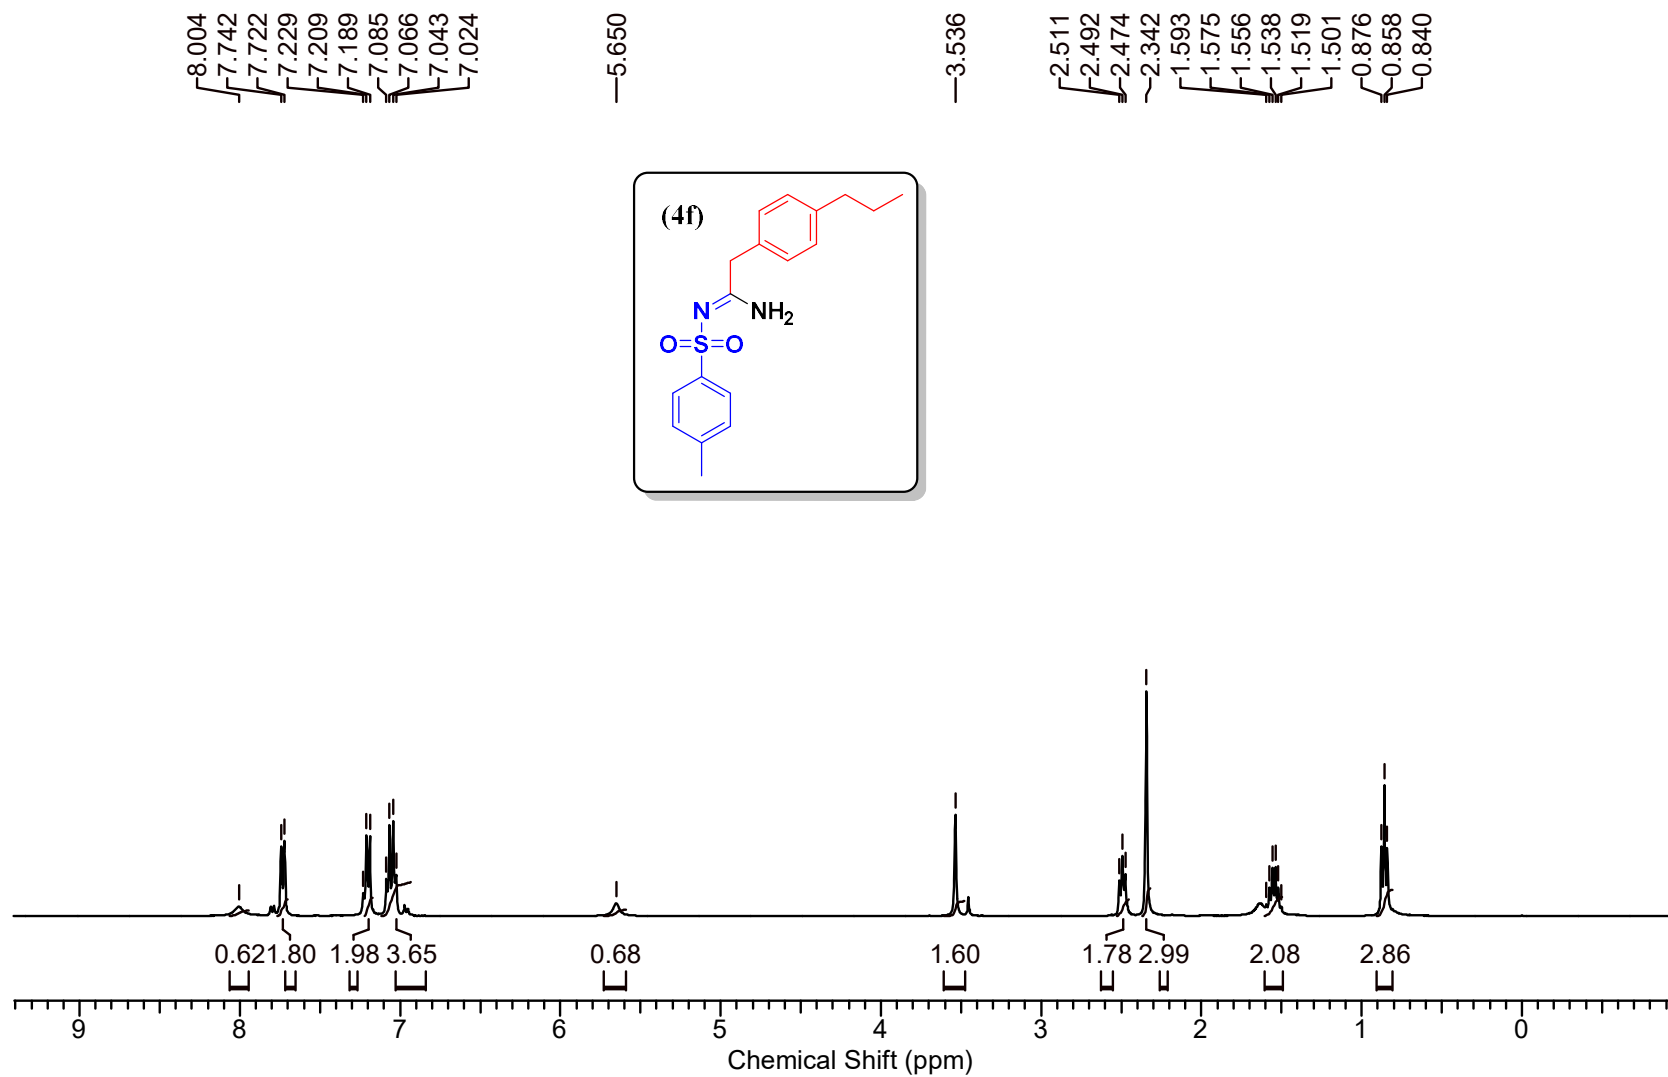



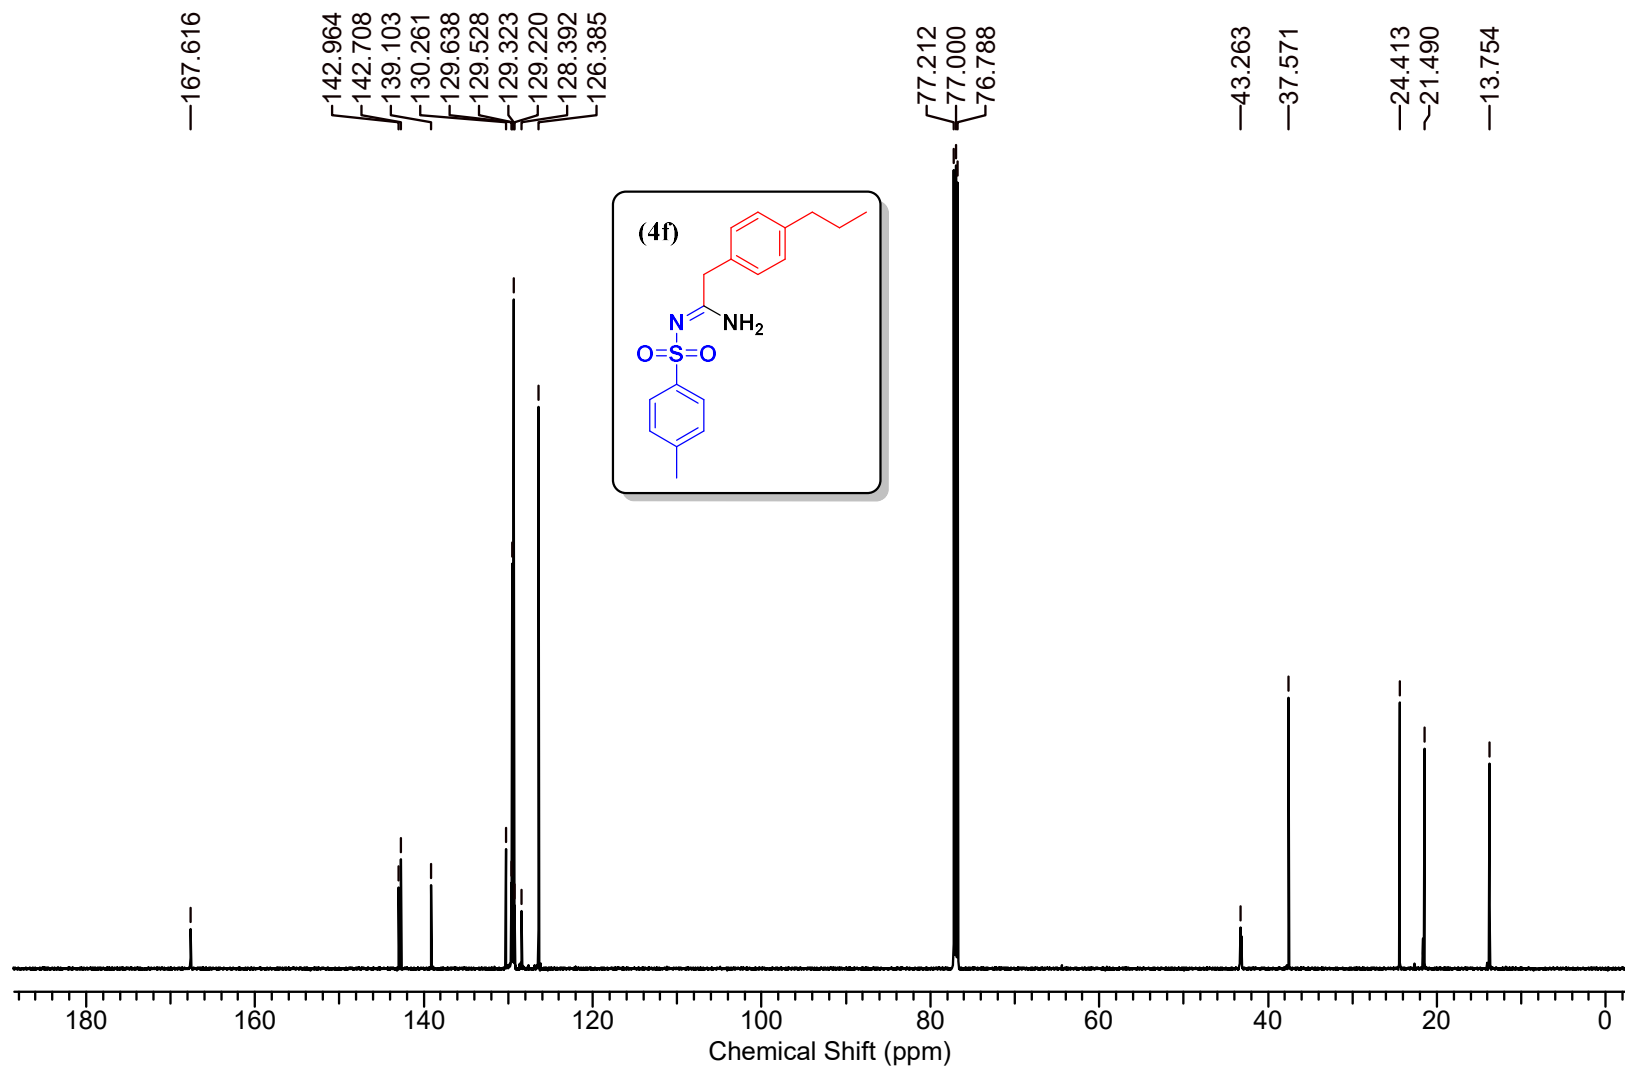

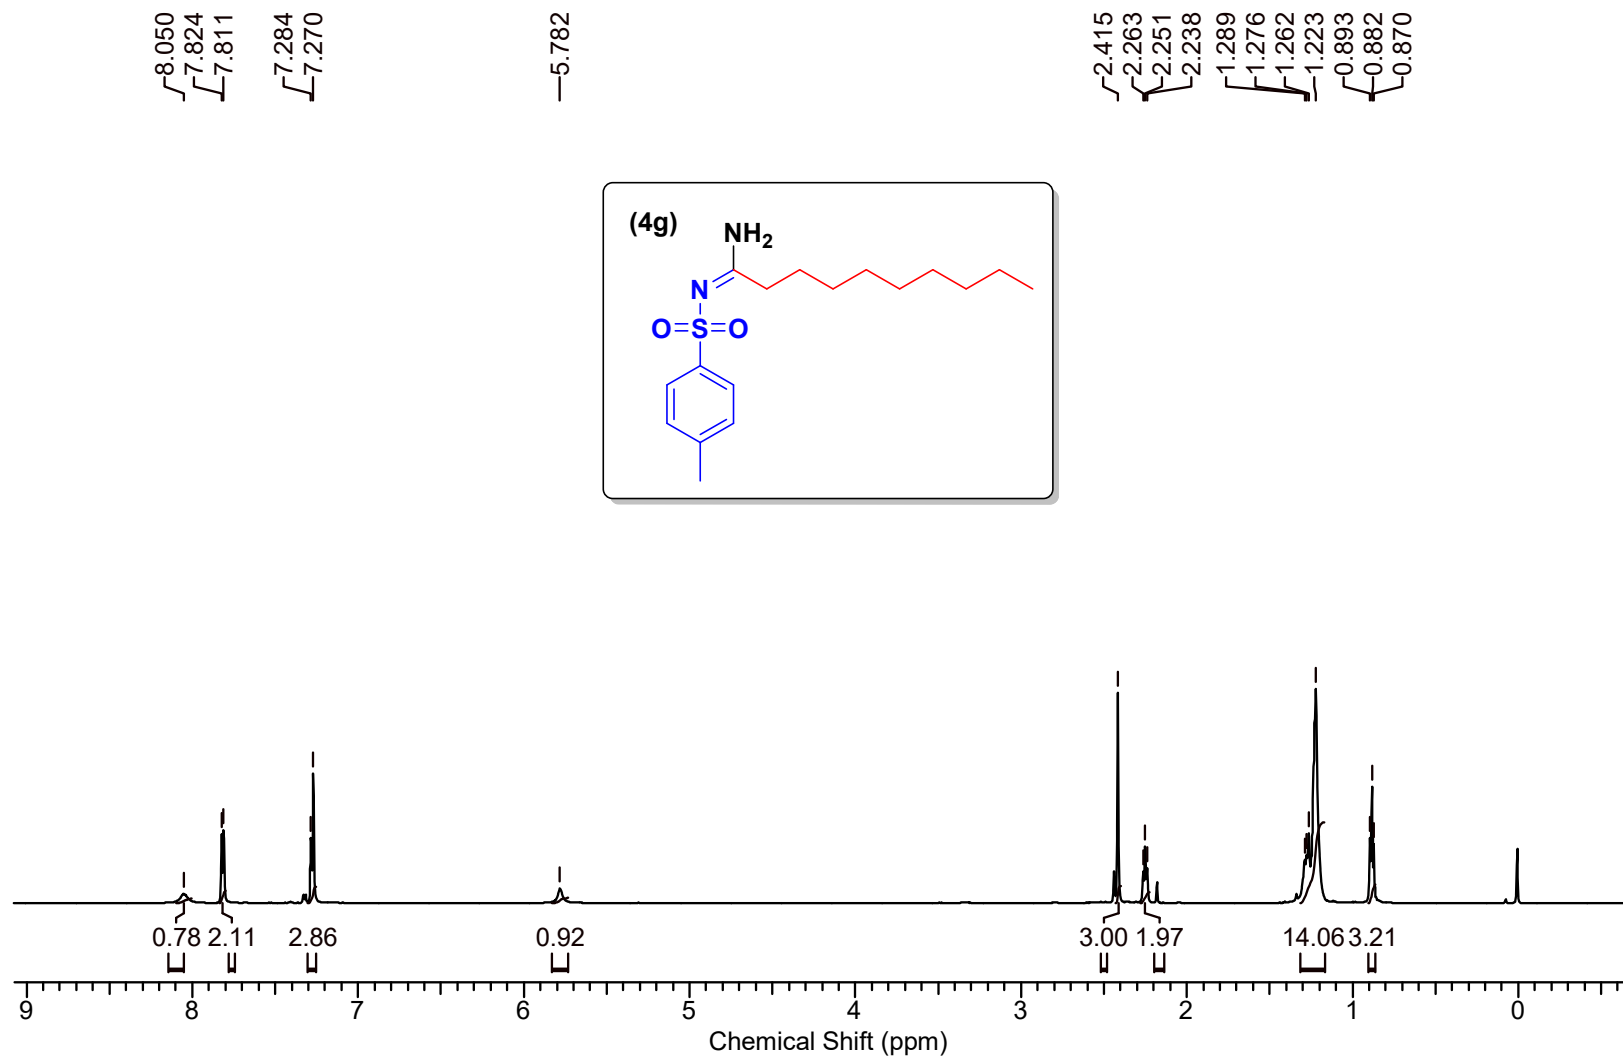

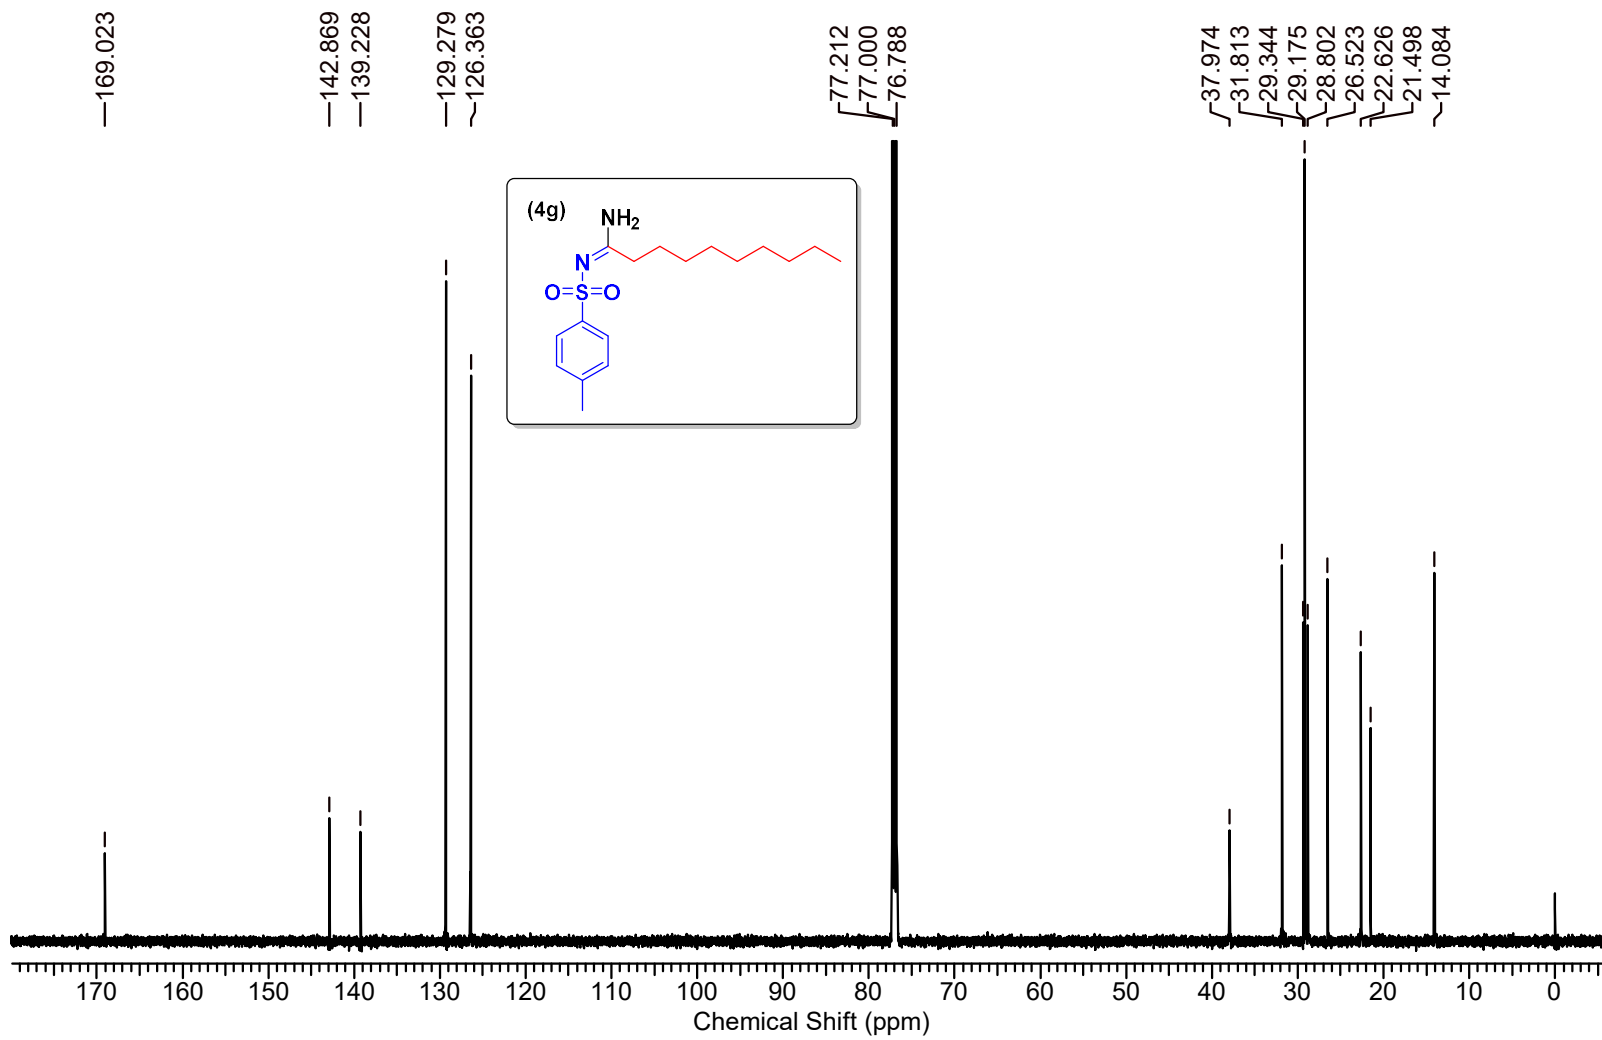

8.051  
7.837  
7.824  
7.302  
7.290

5.961

2.434  
2.280  
2.268  
2.255  
1.692  
1.622  
1.610  
1.270  
1.240  
1.219  
1.211  
1.200  
0.891  
0.880  
0.867

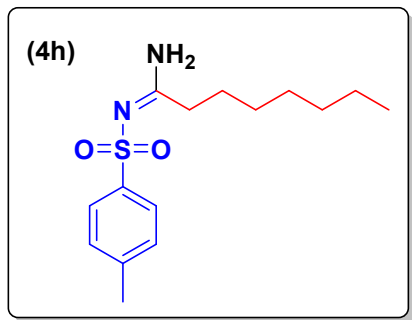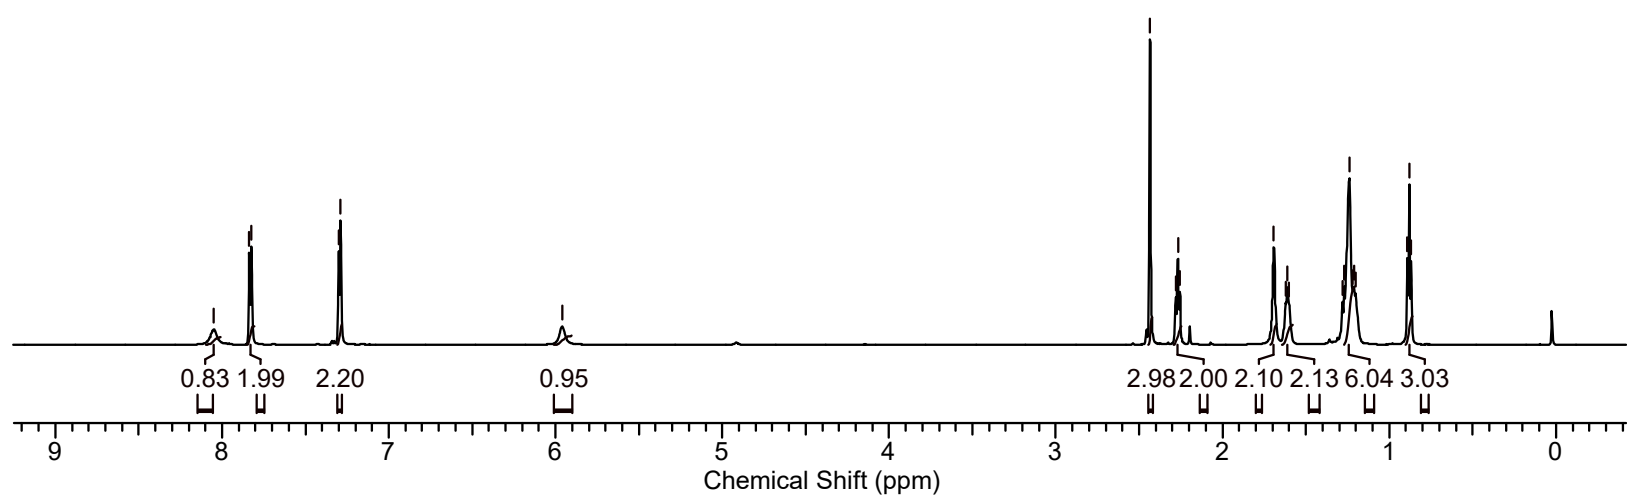

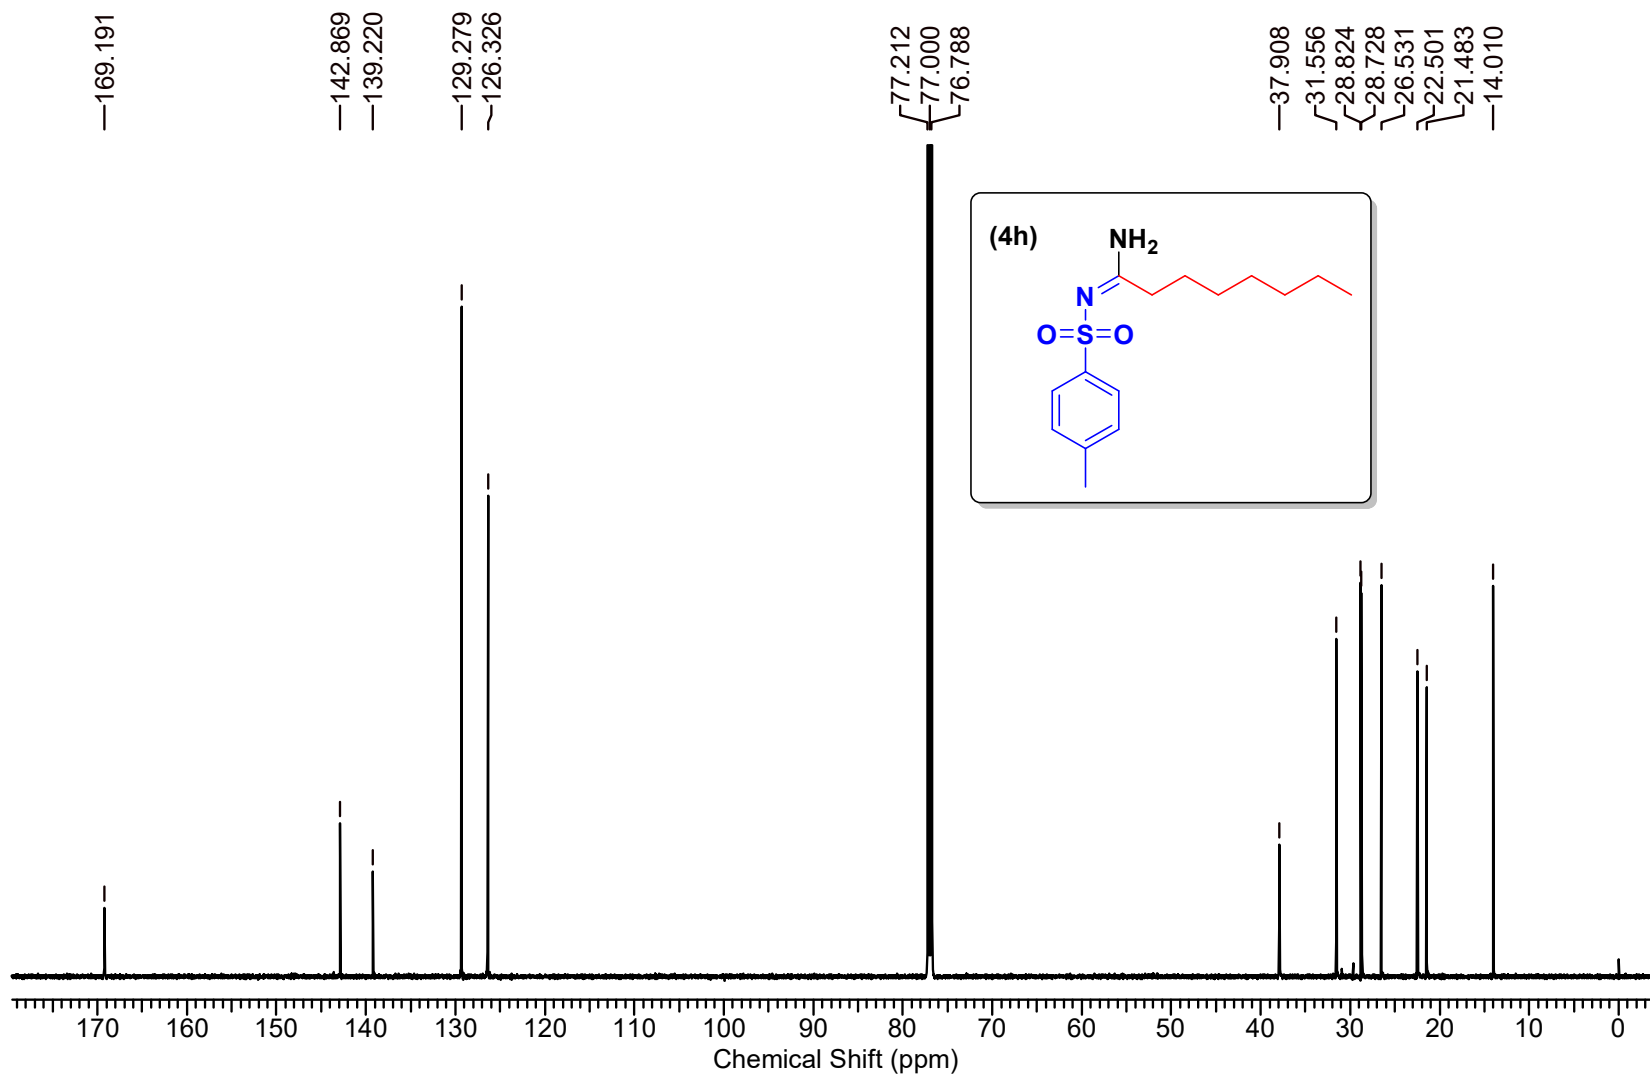

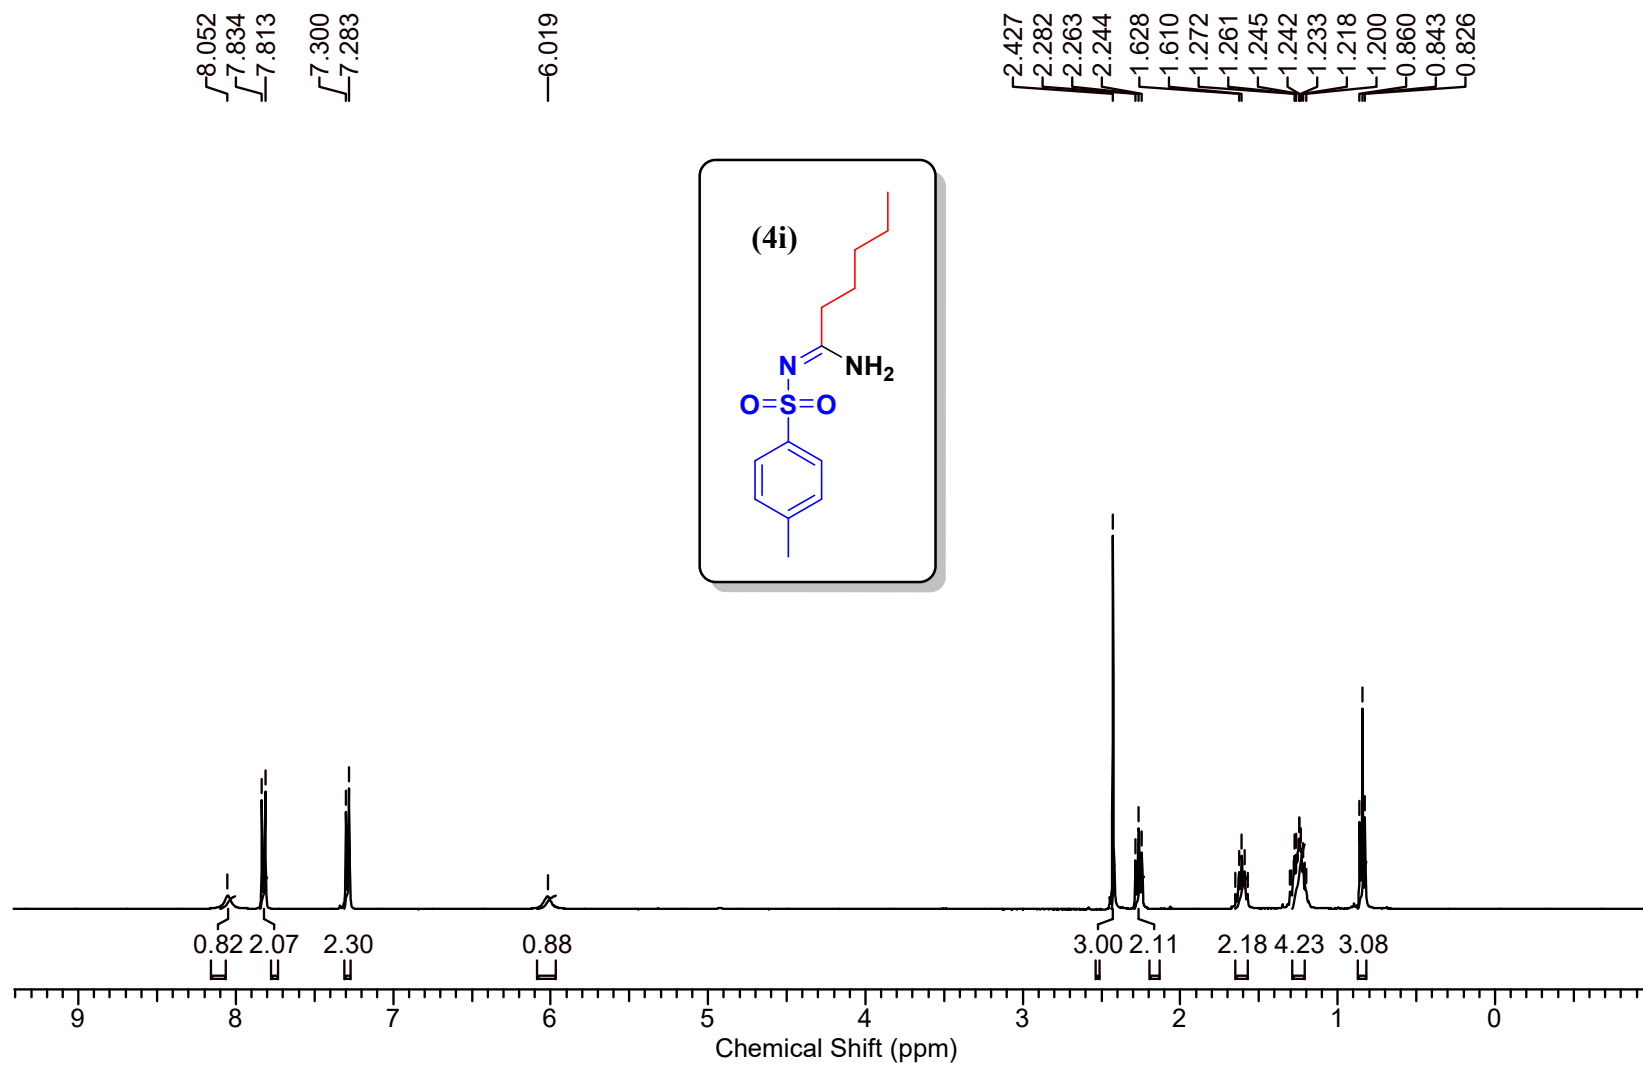

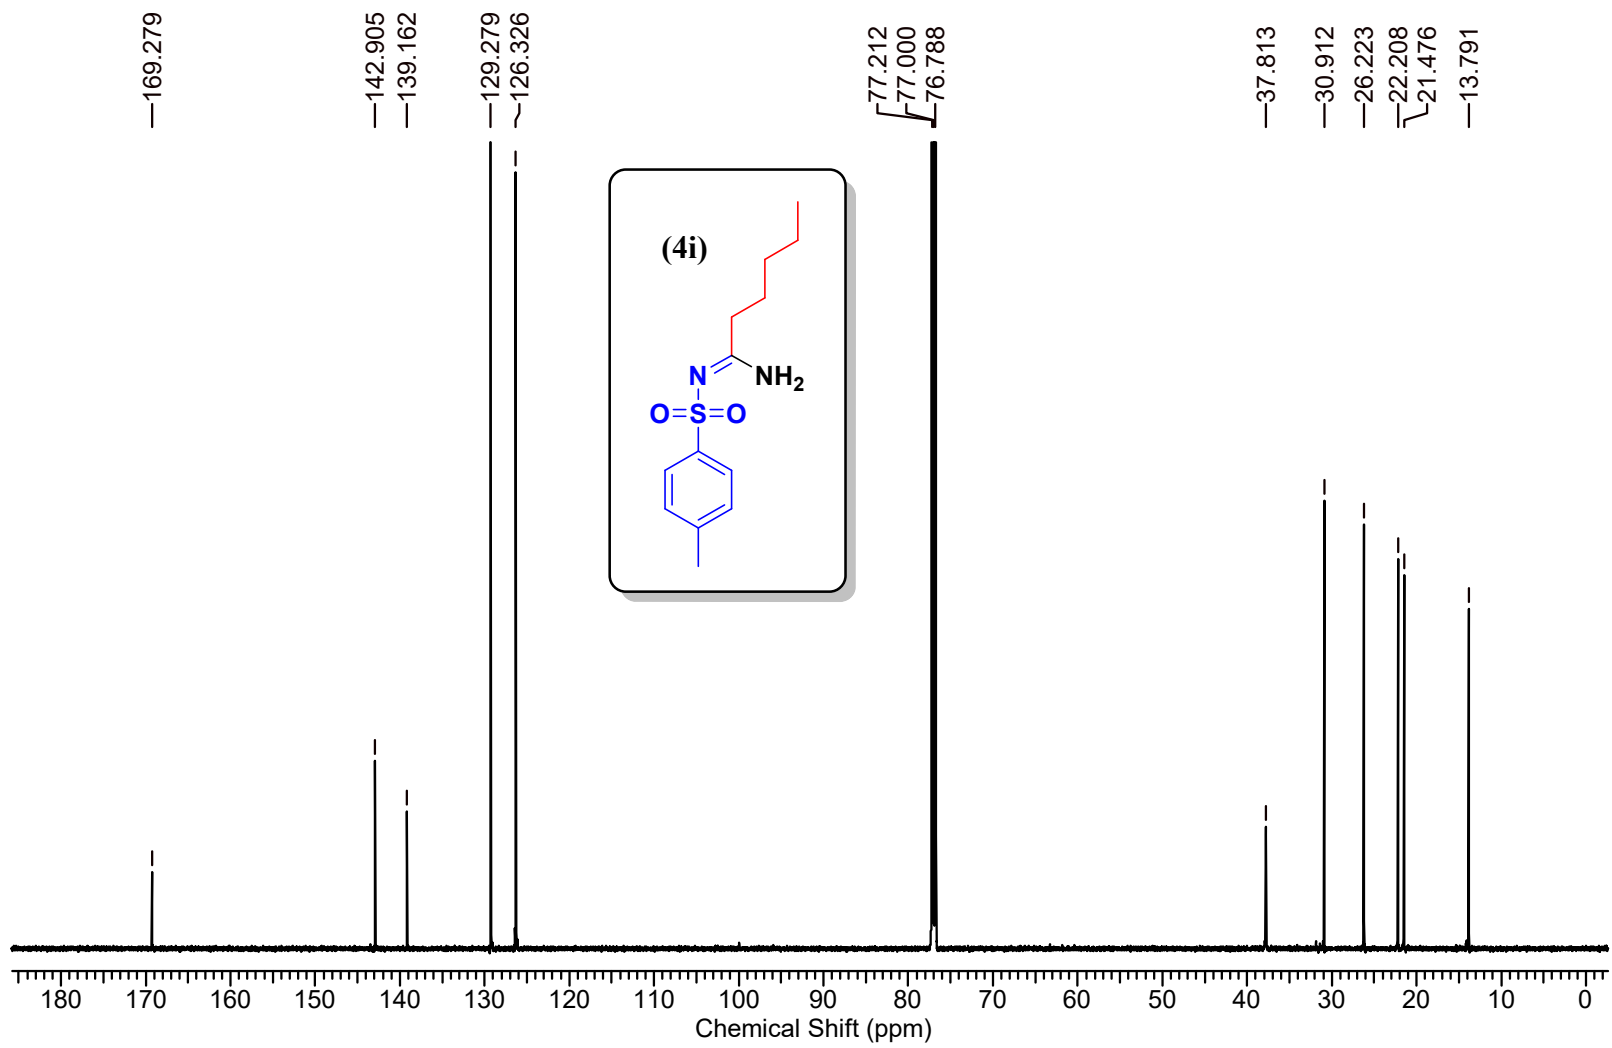

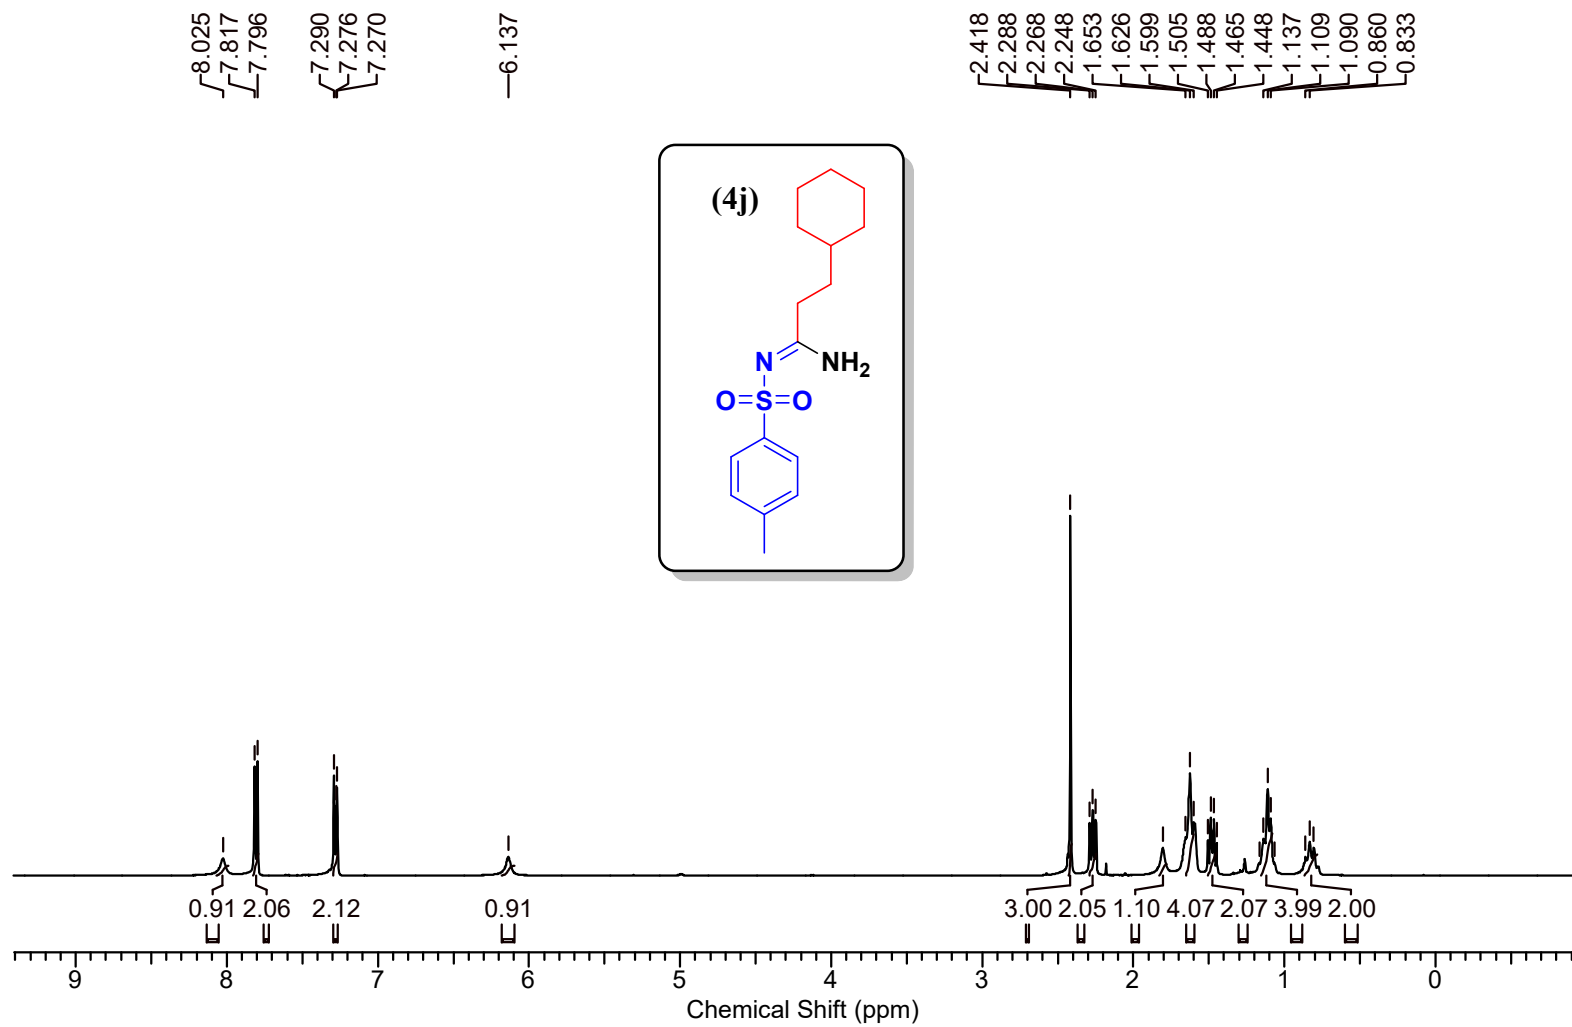



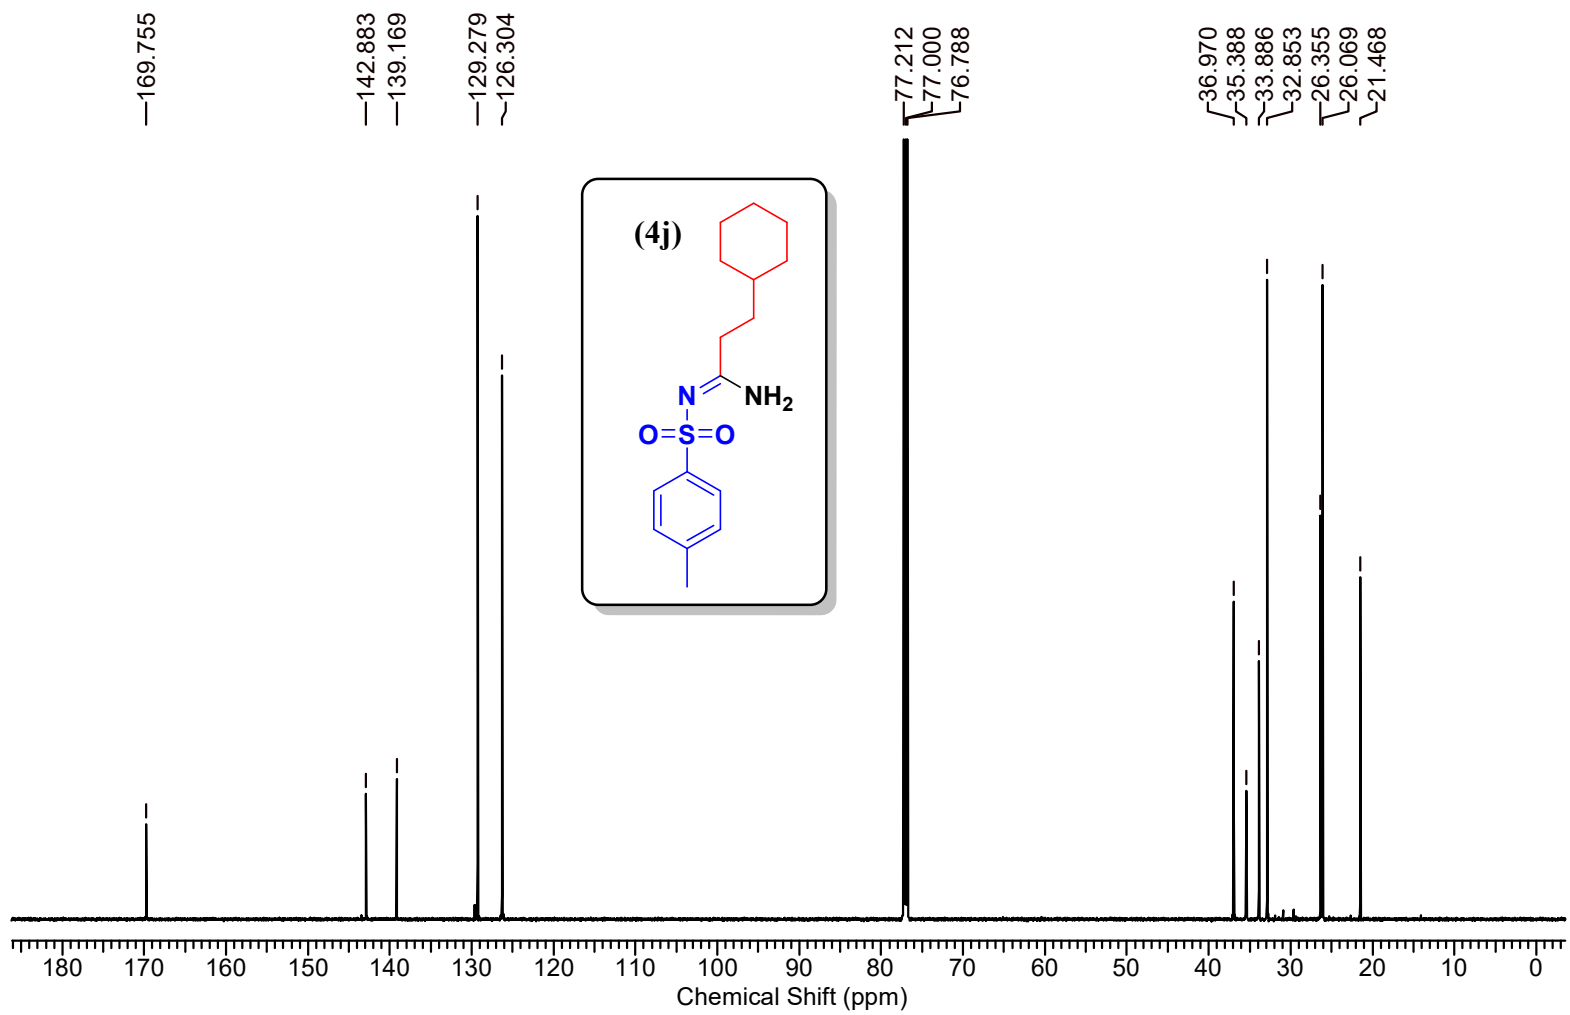

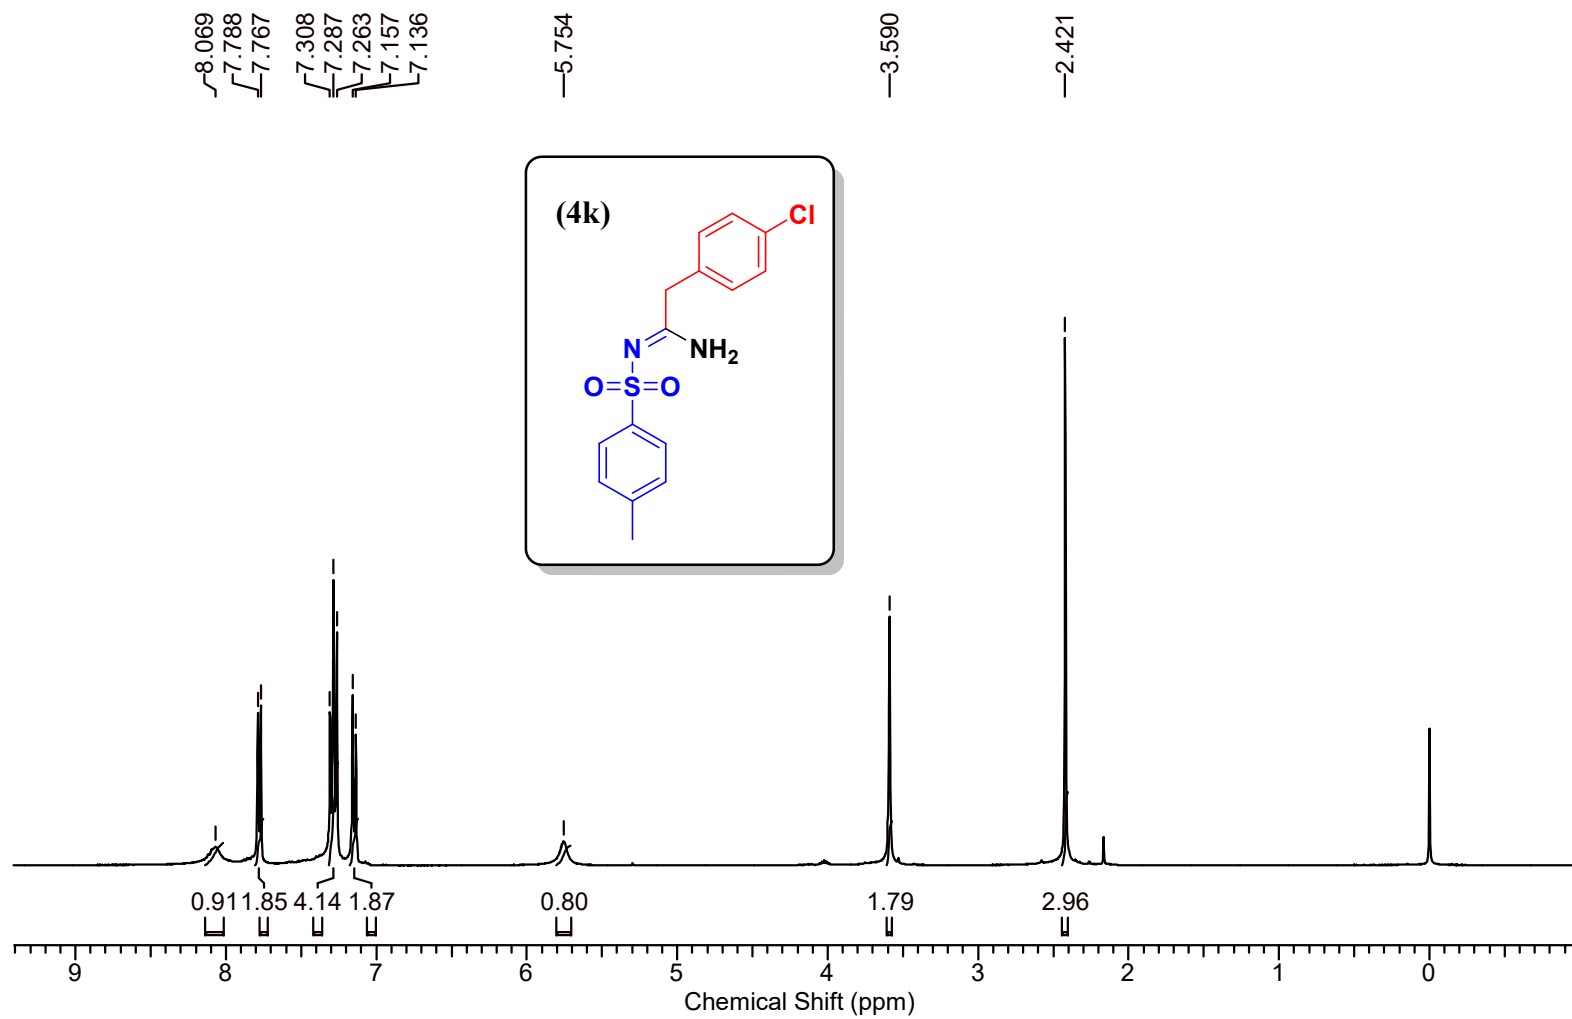

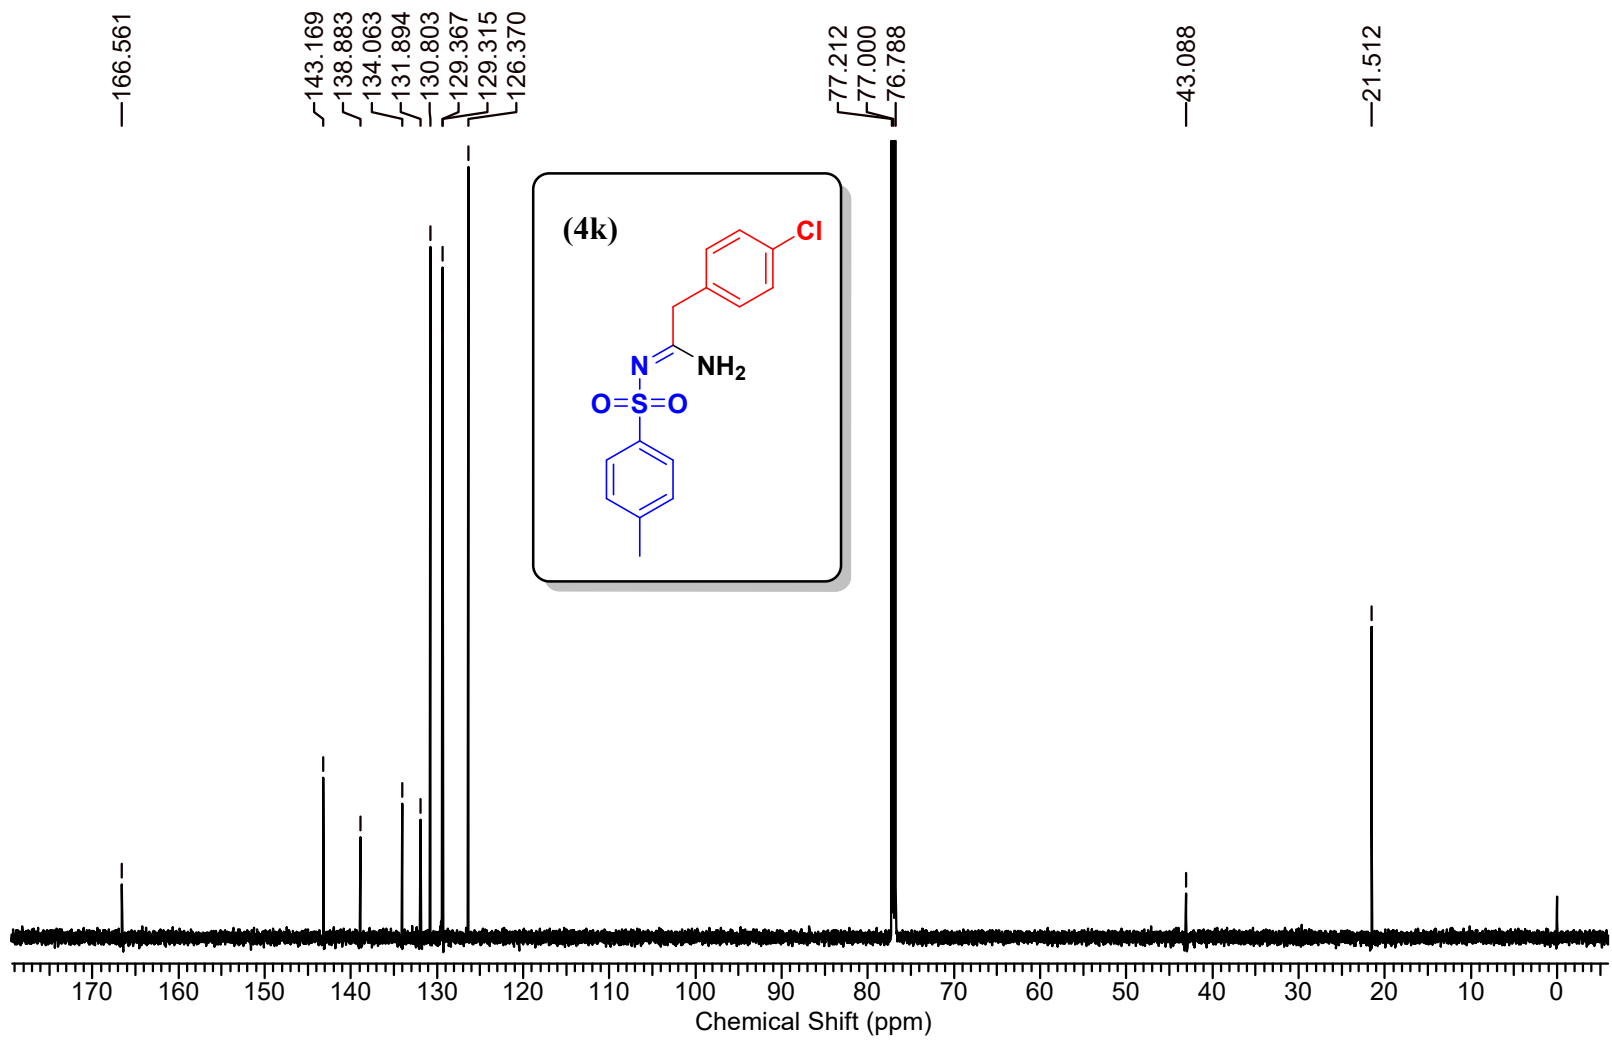

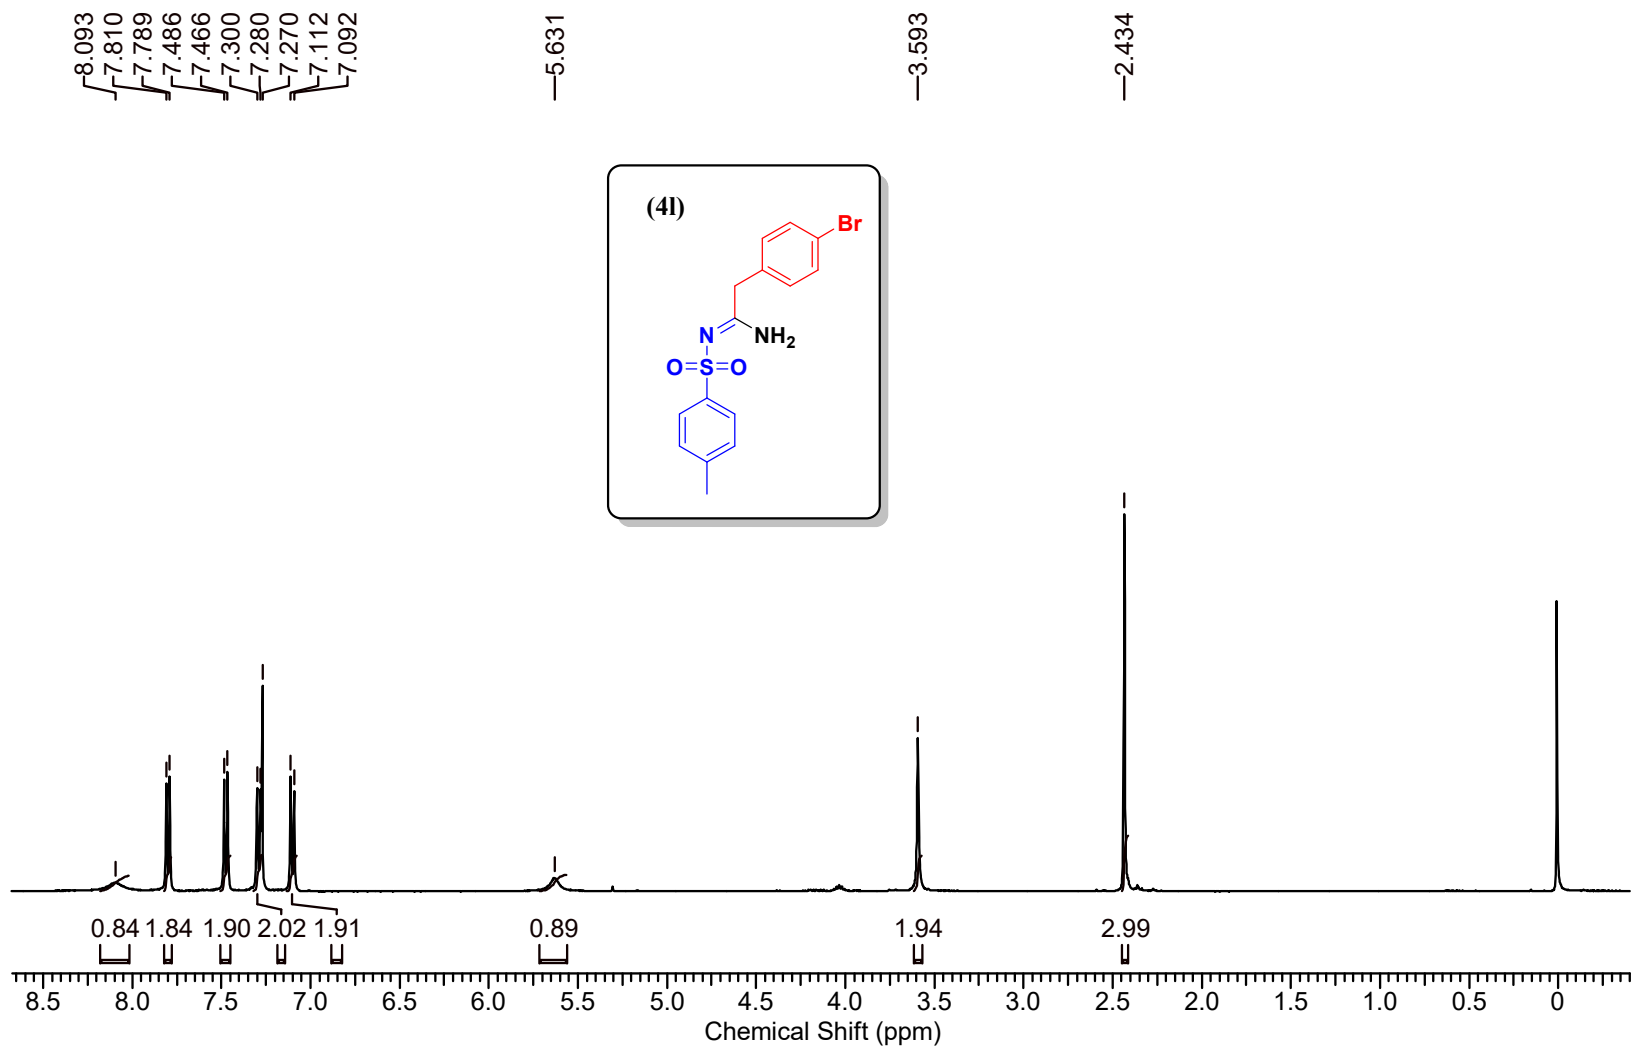

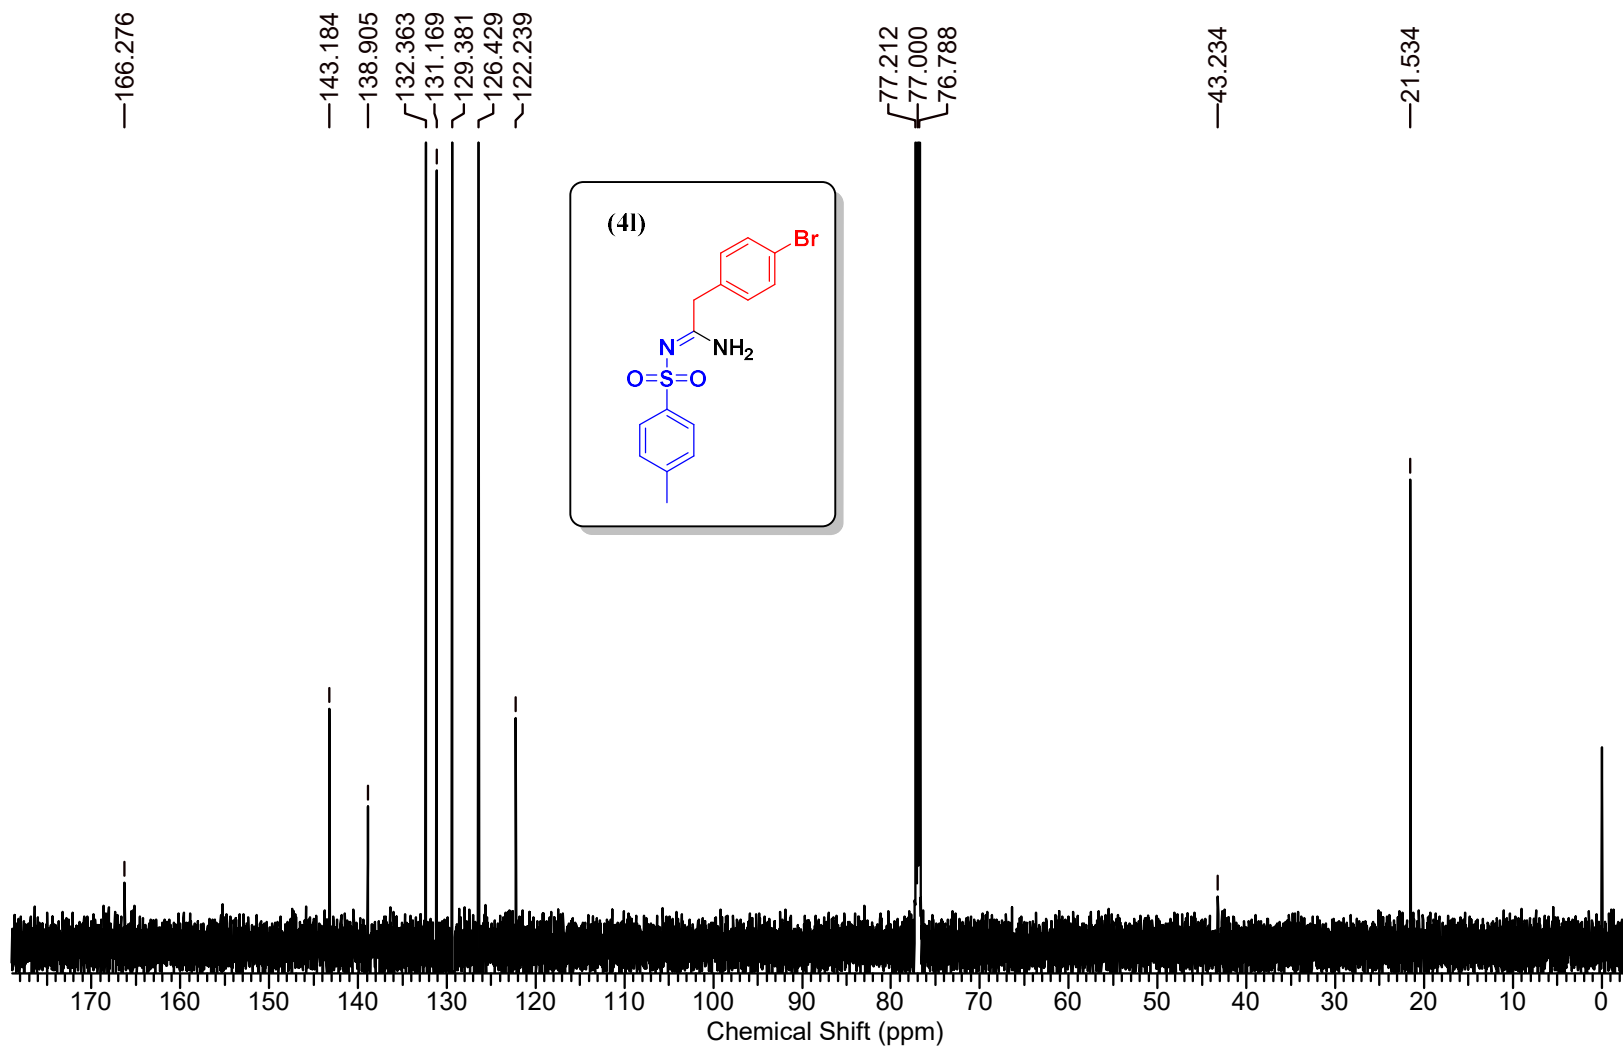

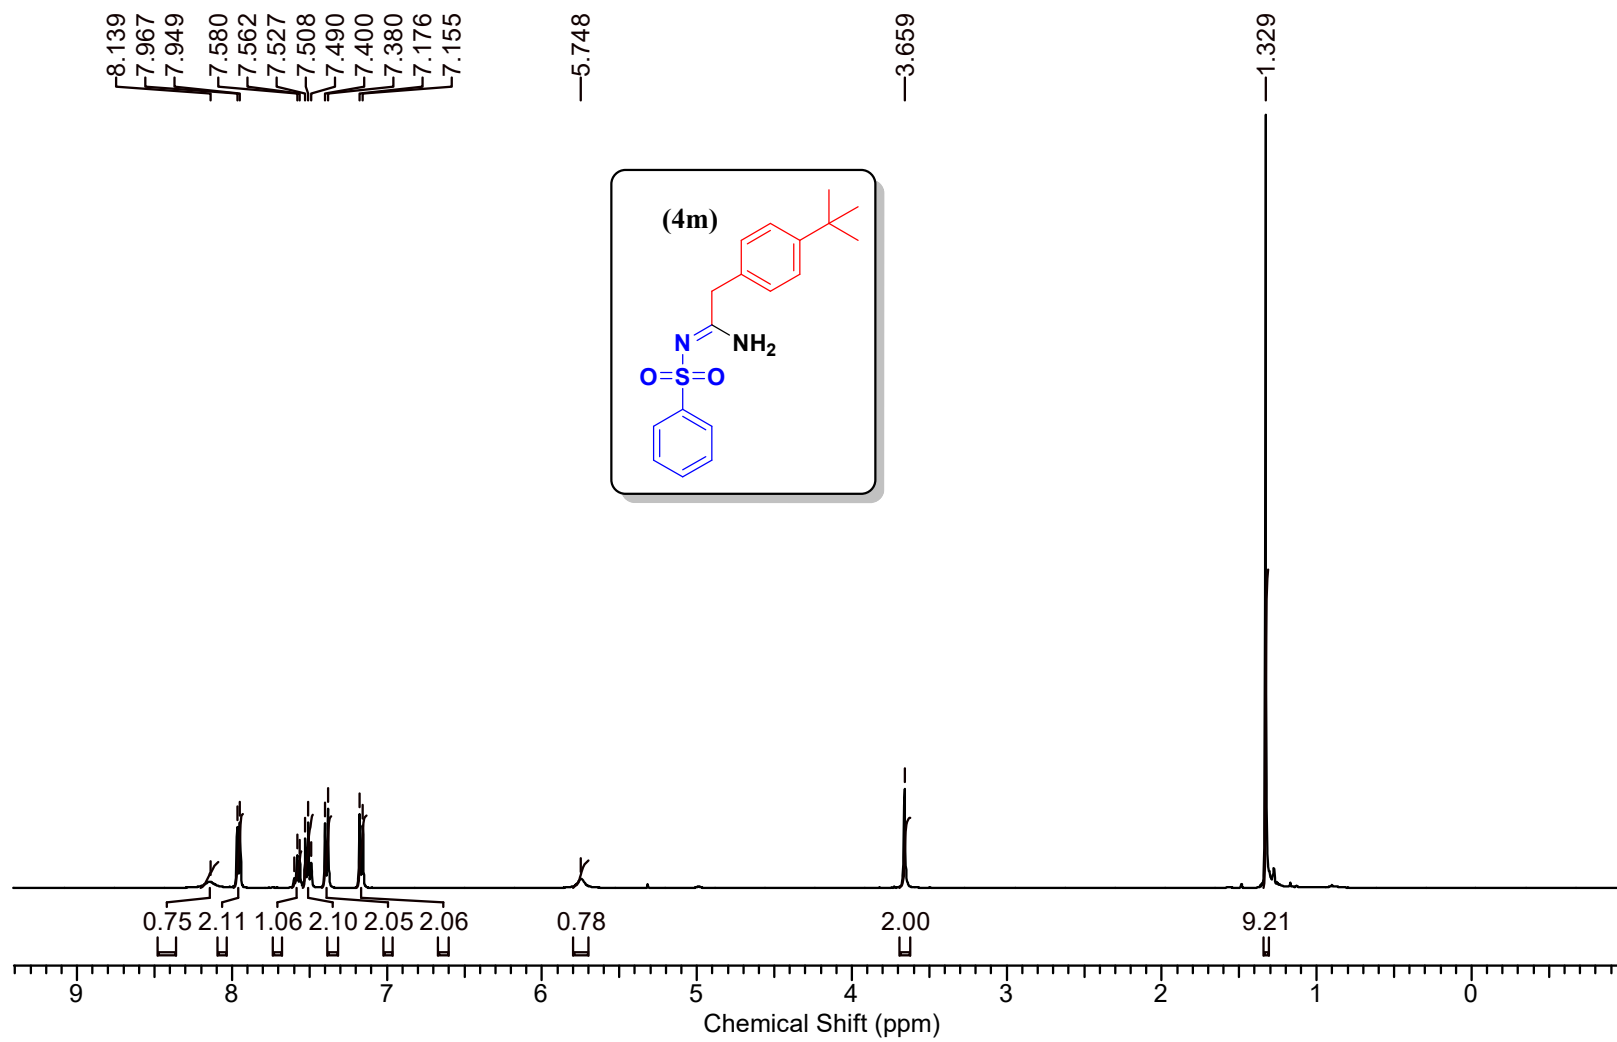

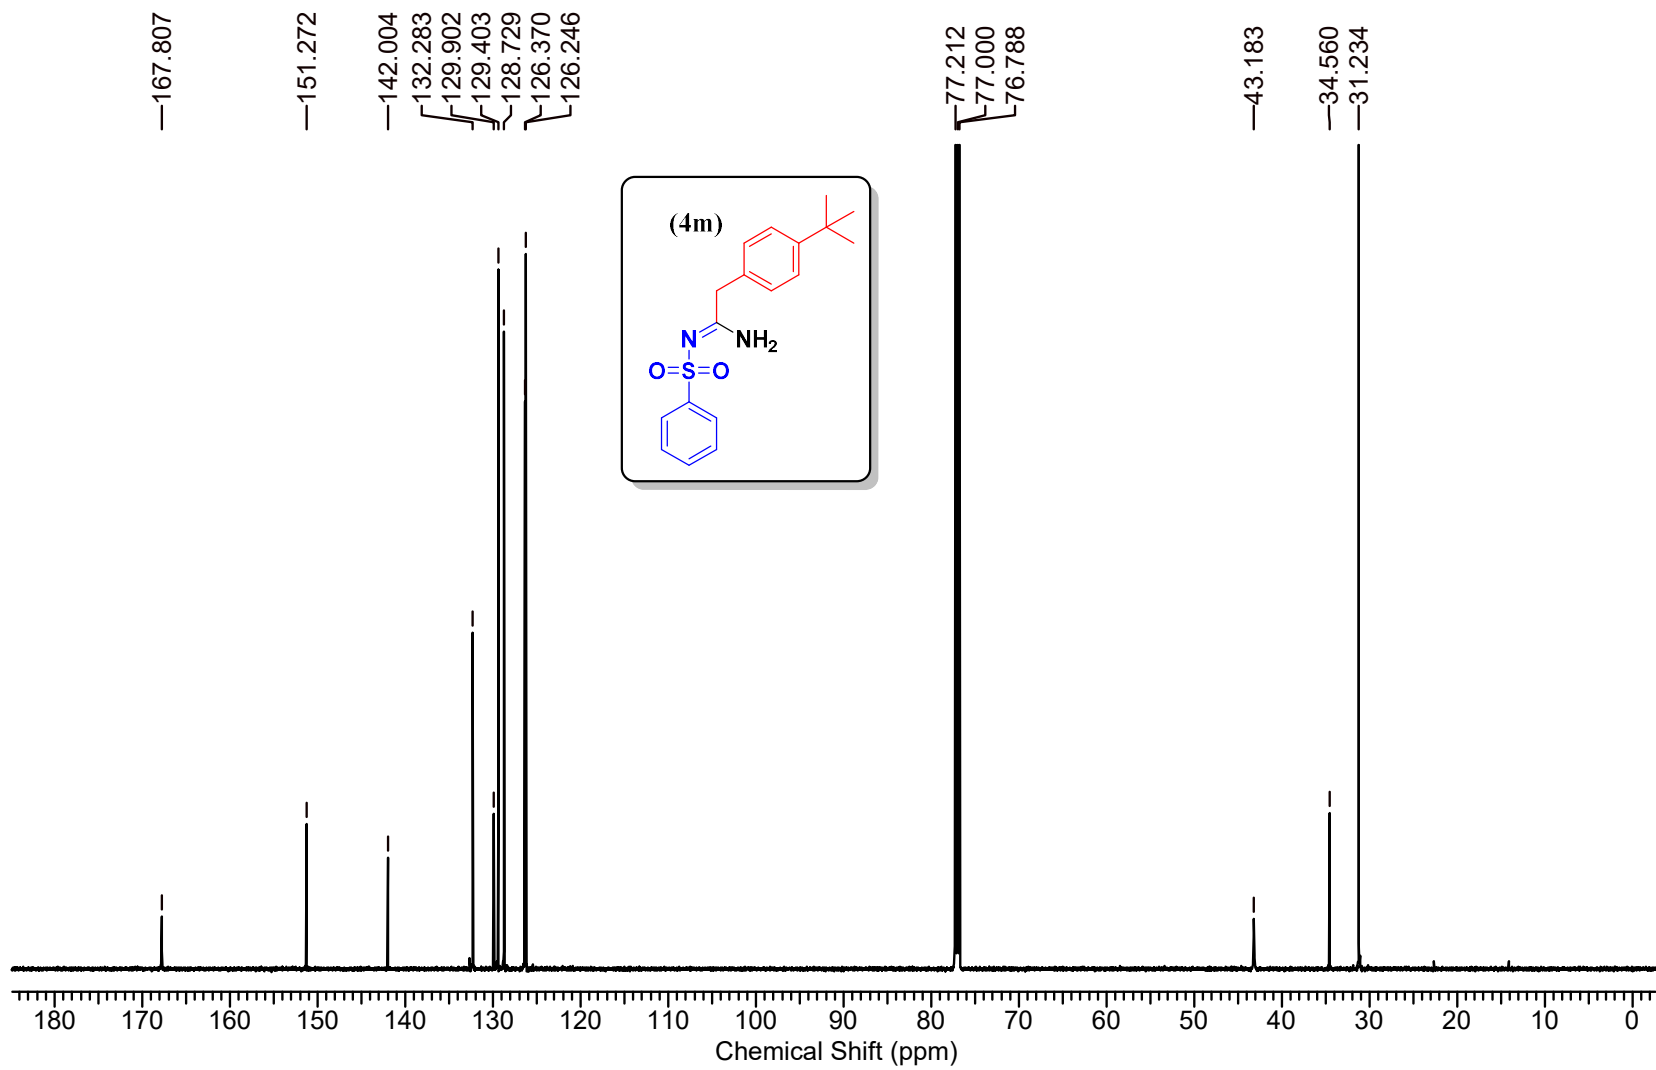

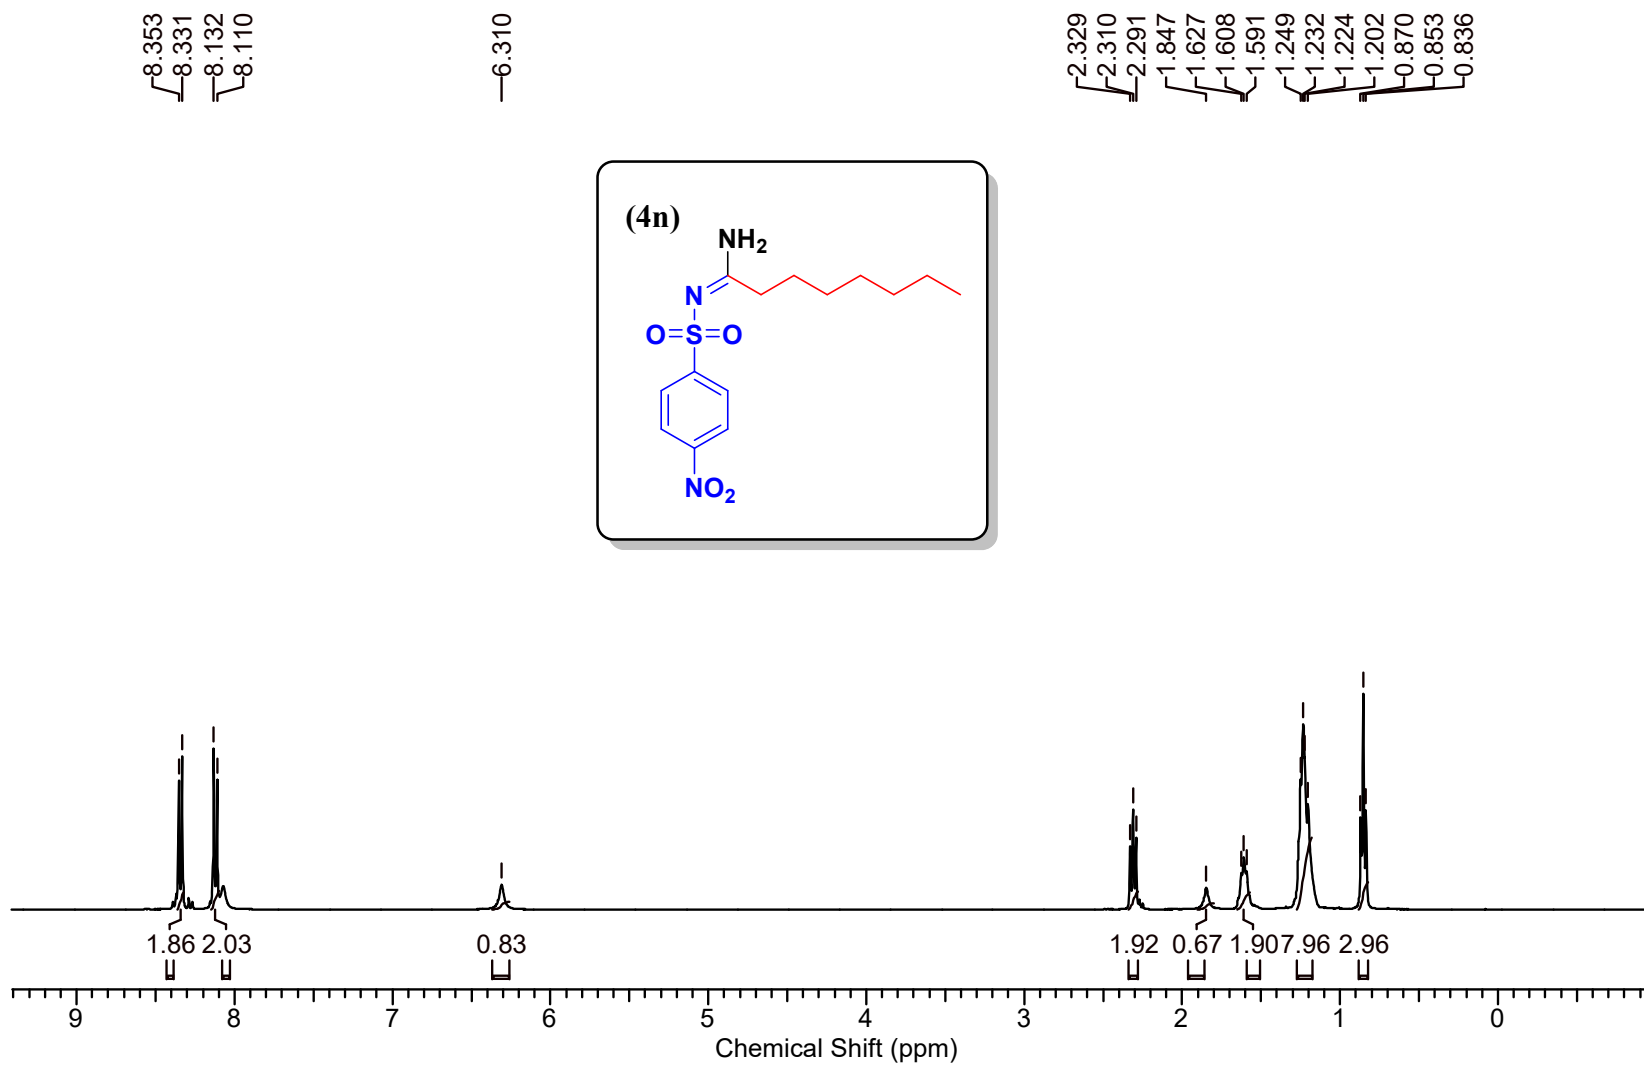



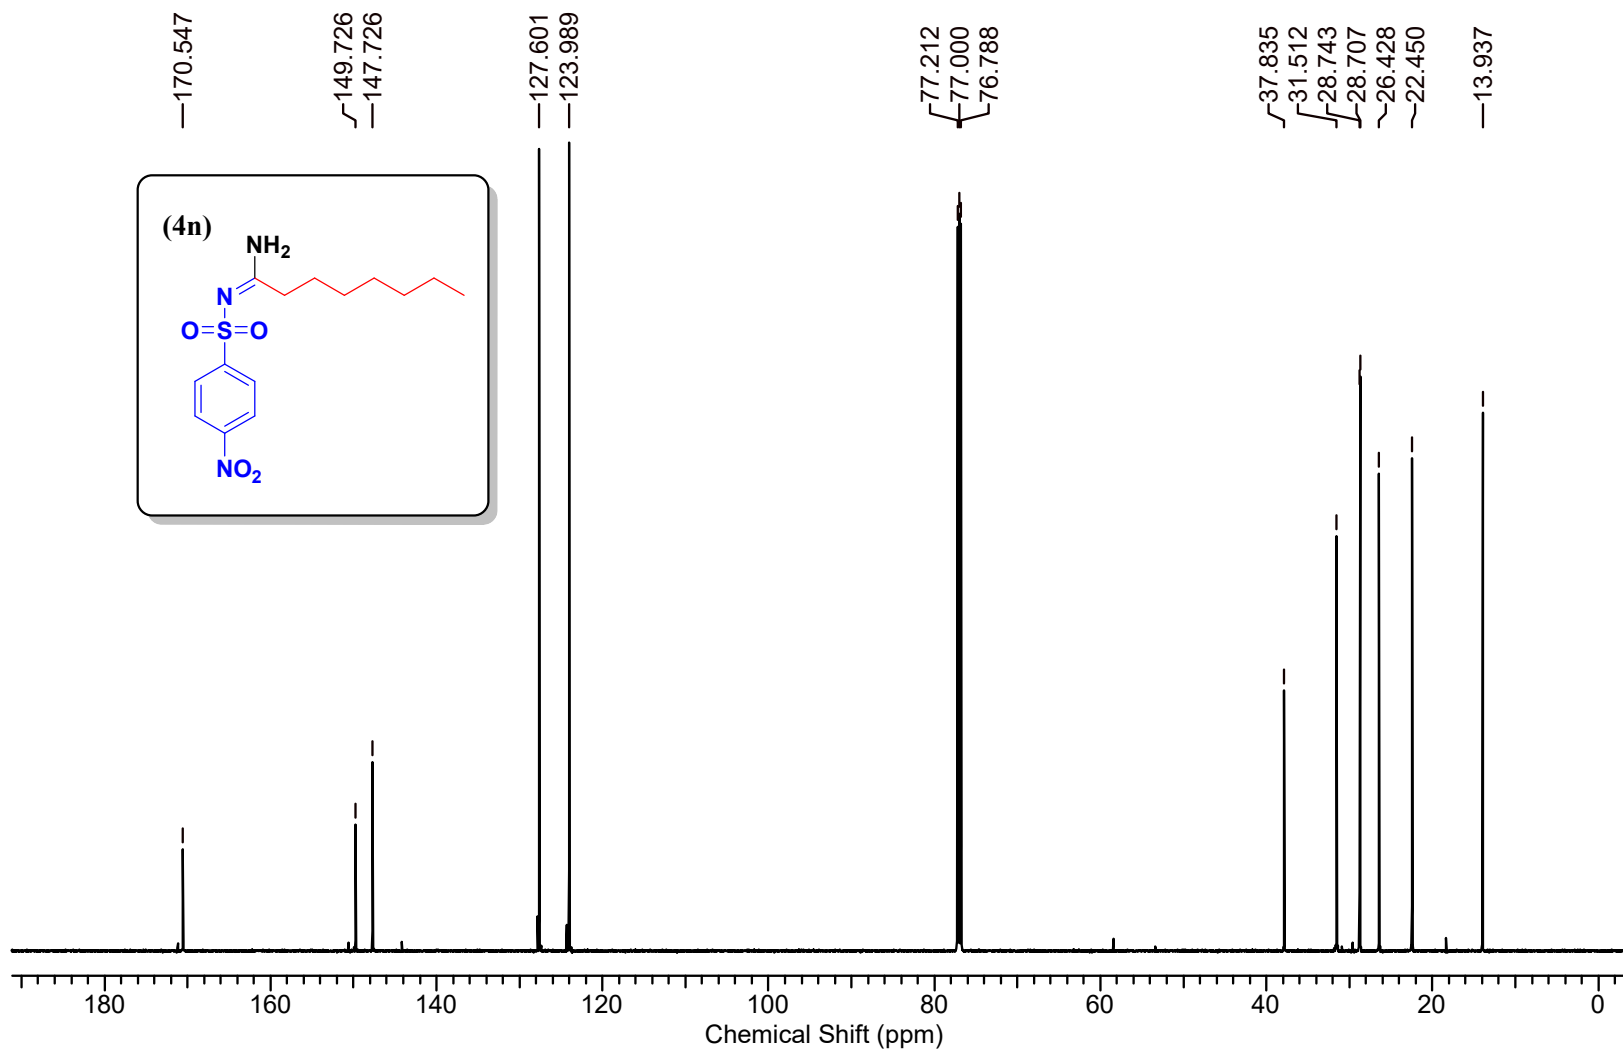

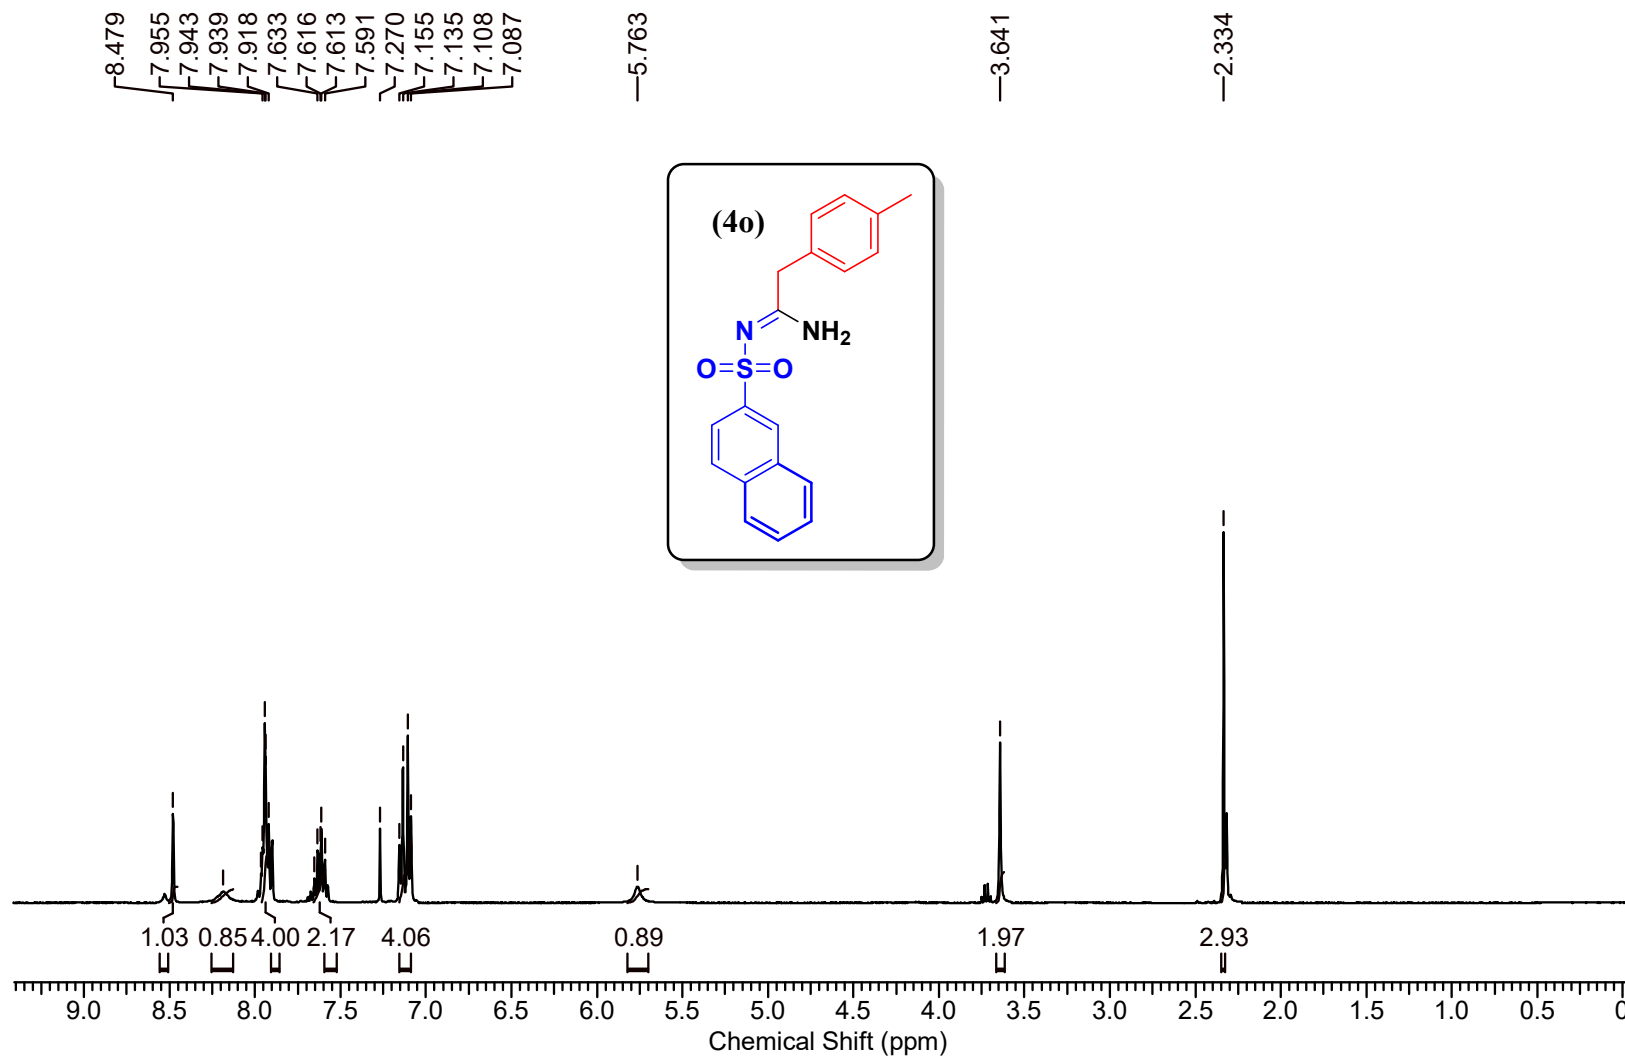

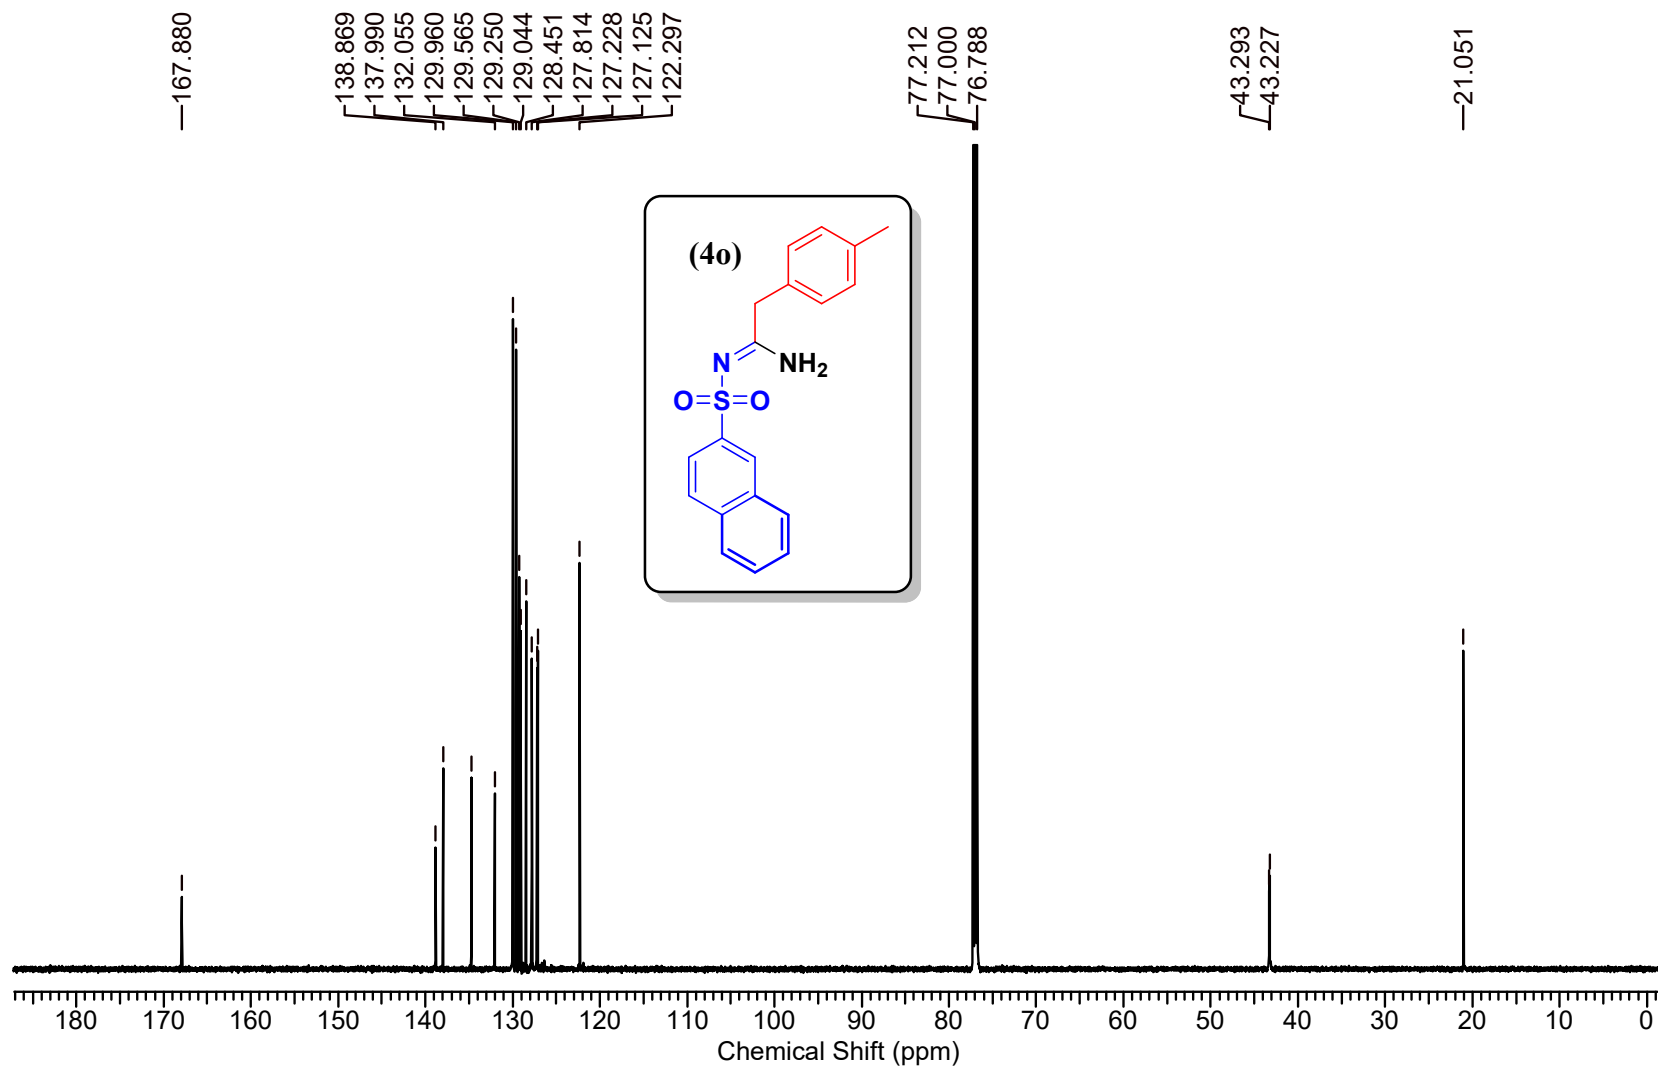

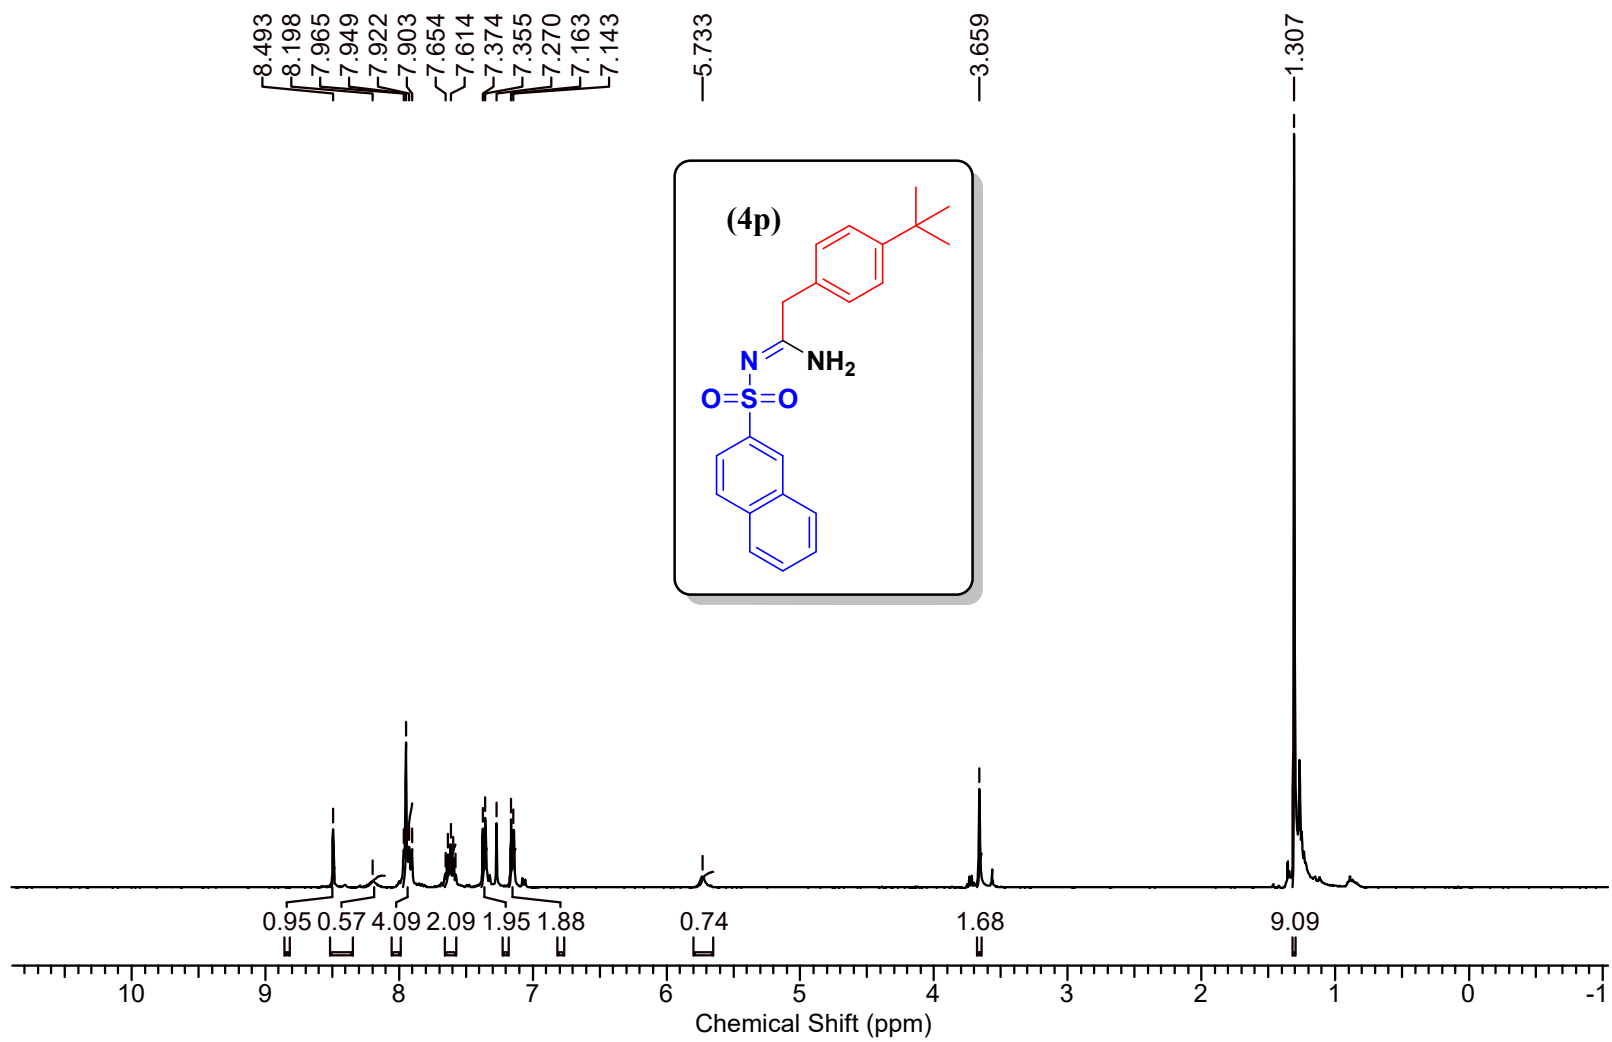

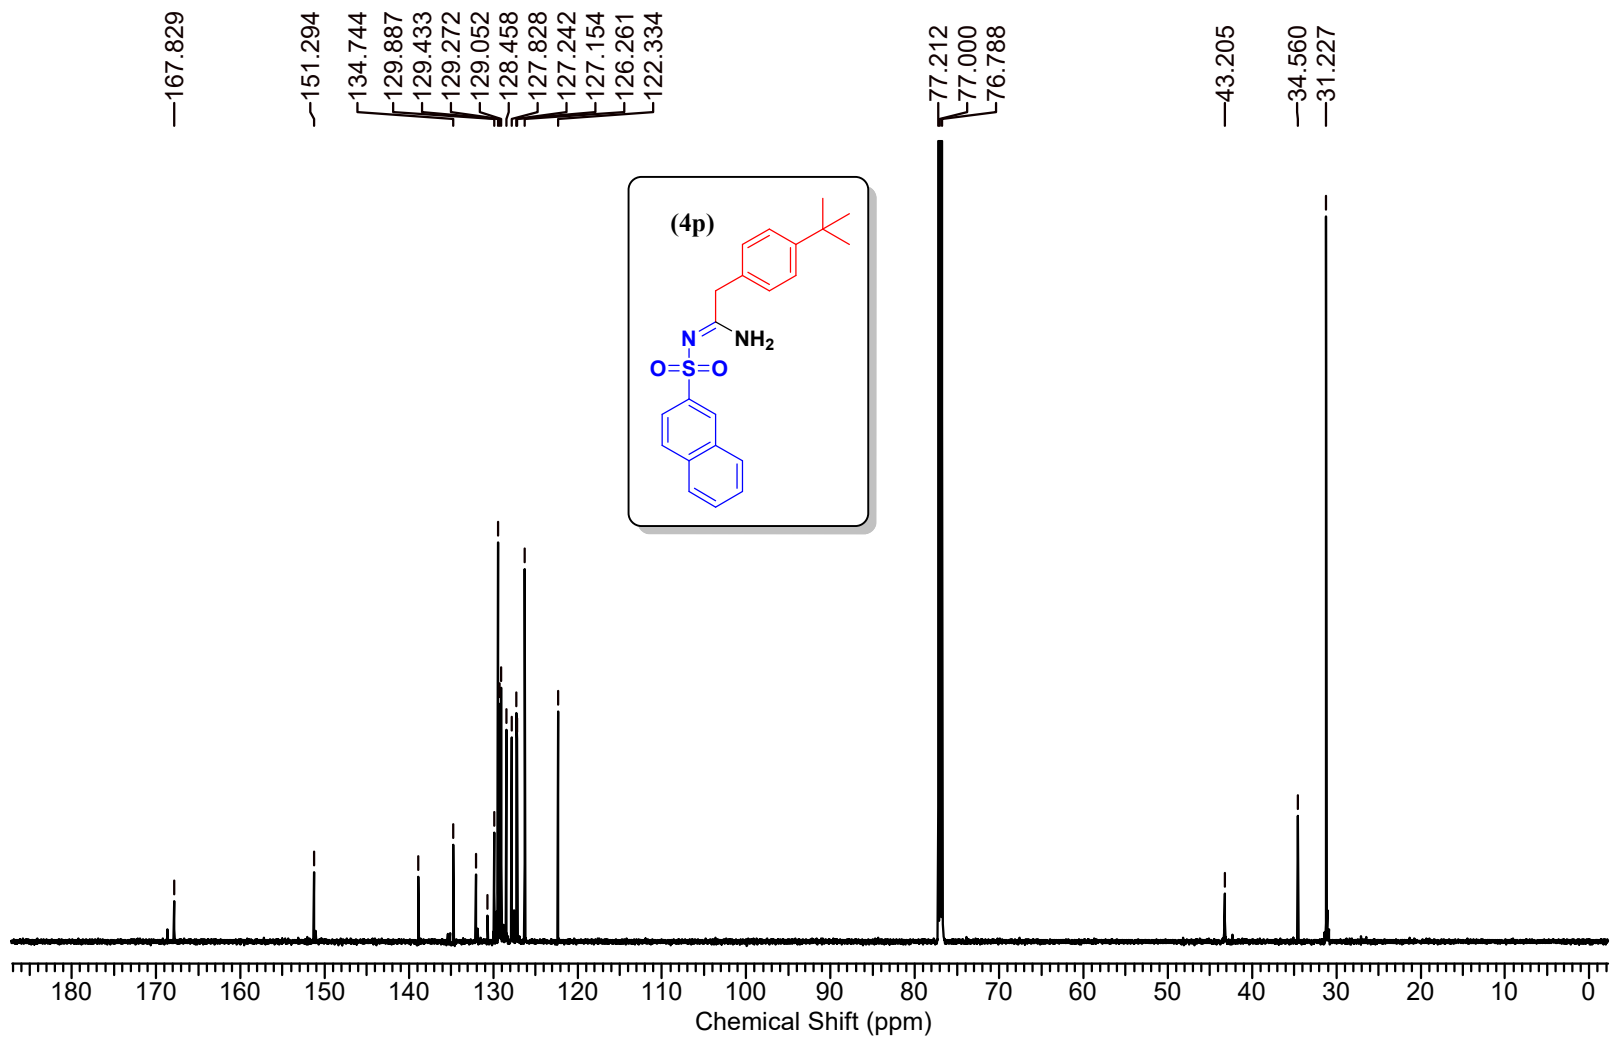

8.073  
7.941  
7.924  
7.572  
7.553  
7.536  
7.506  
7.487  
7.469  
7.270

6.045

2.307  
2.288  
2.267  
1.652  
1.628  
1.600  
1.516  
1.499  
1.477  
1.138  
1.133  
1.111  
1.089  
0.840  
0.812

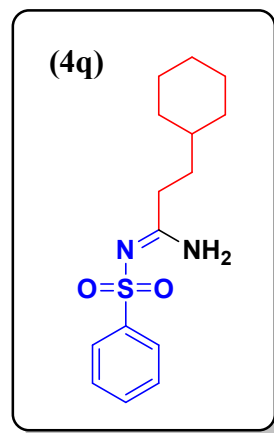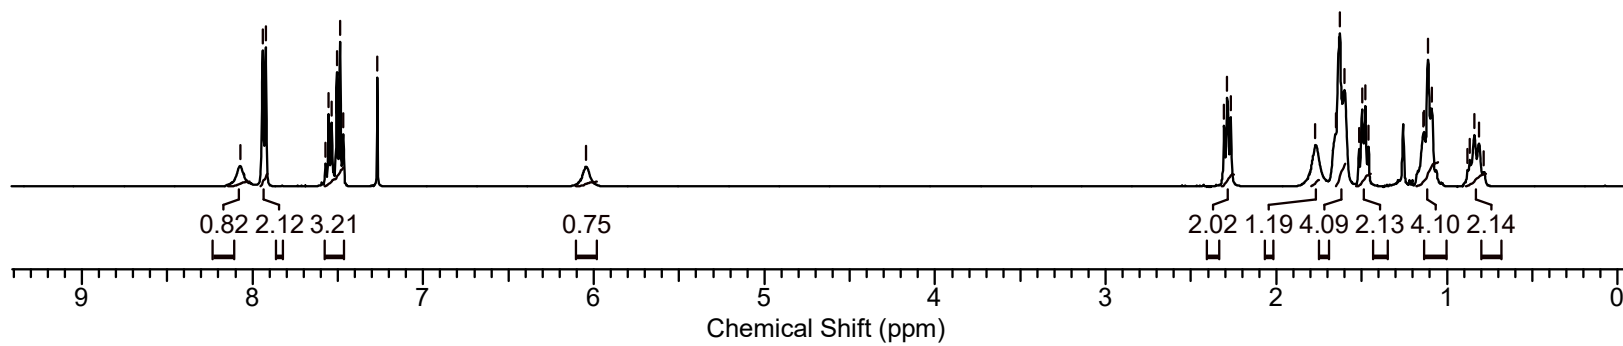

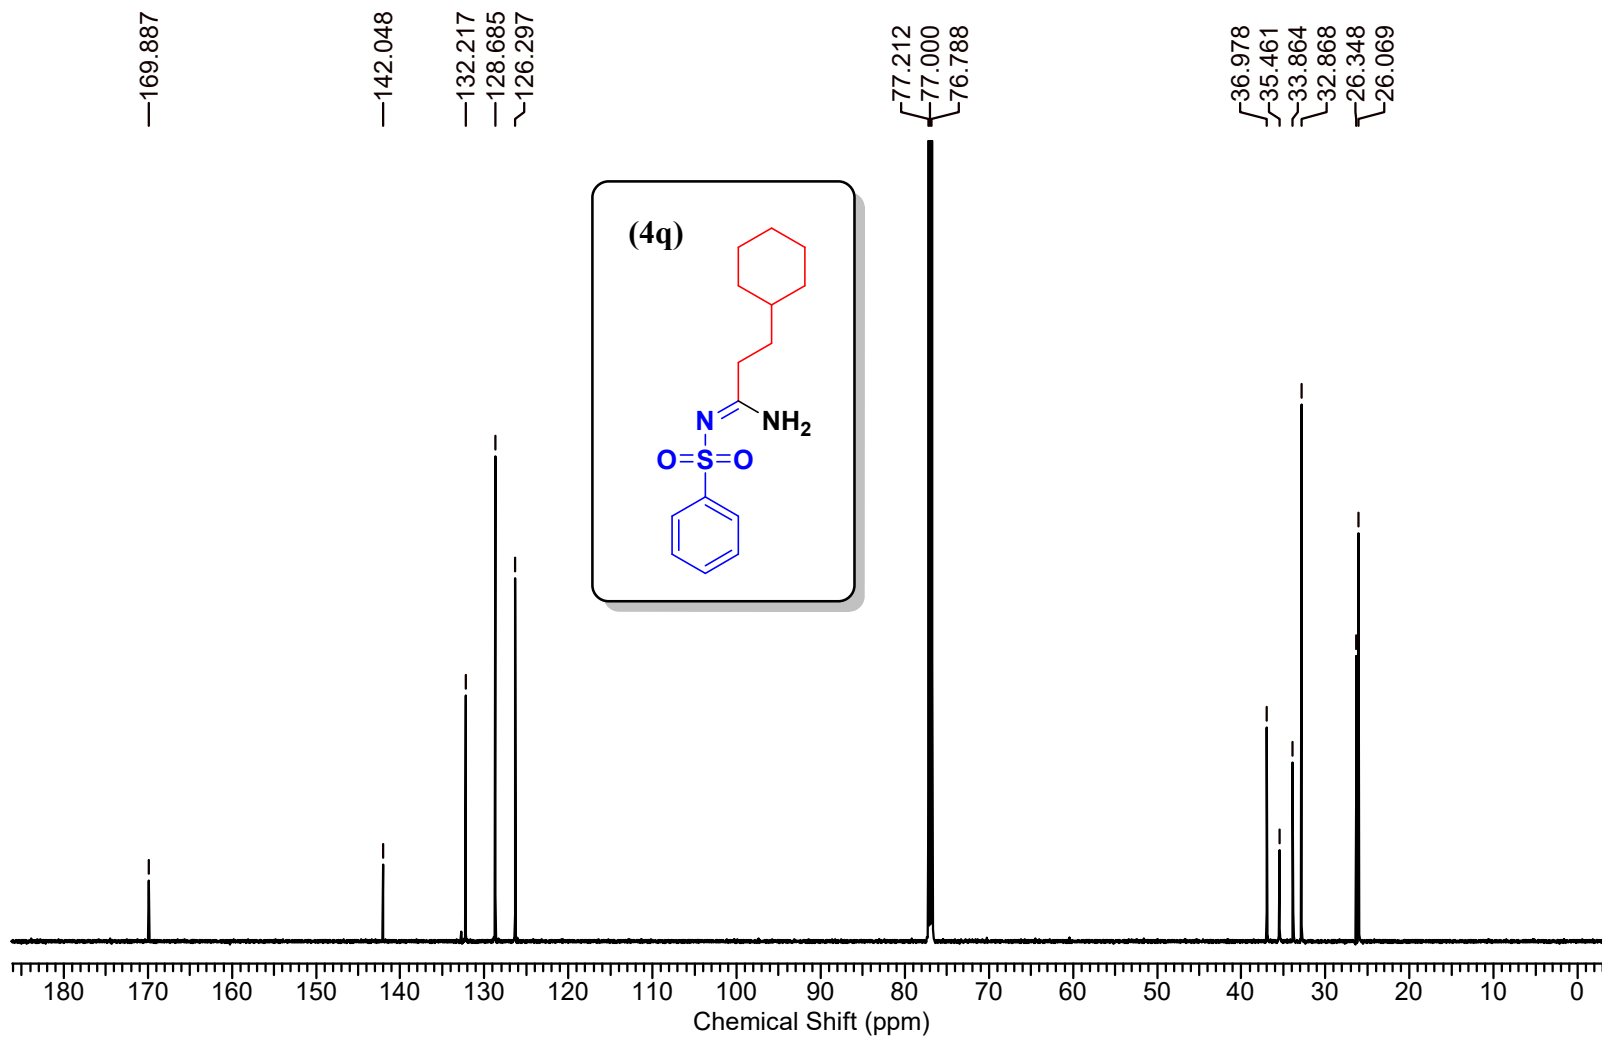

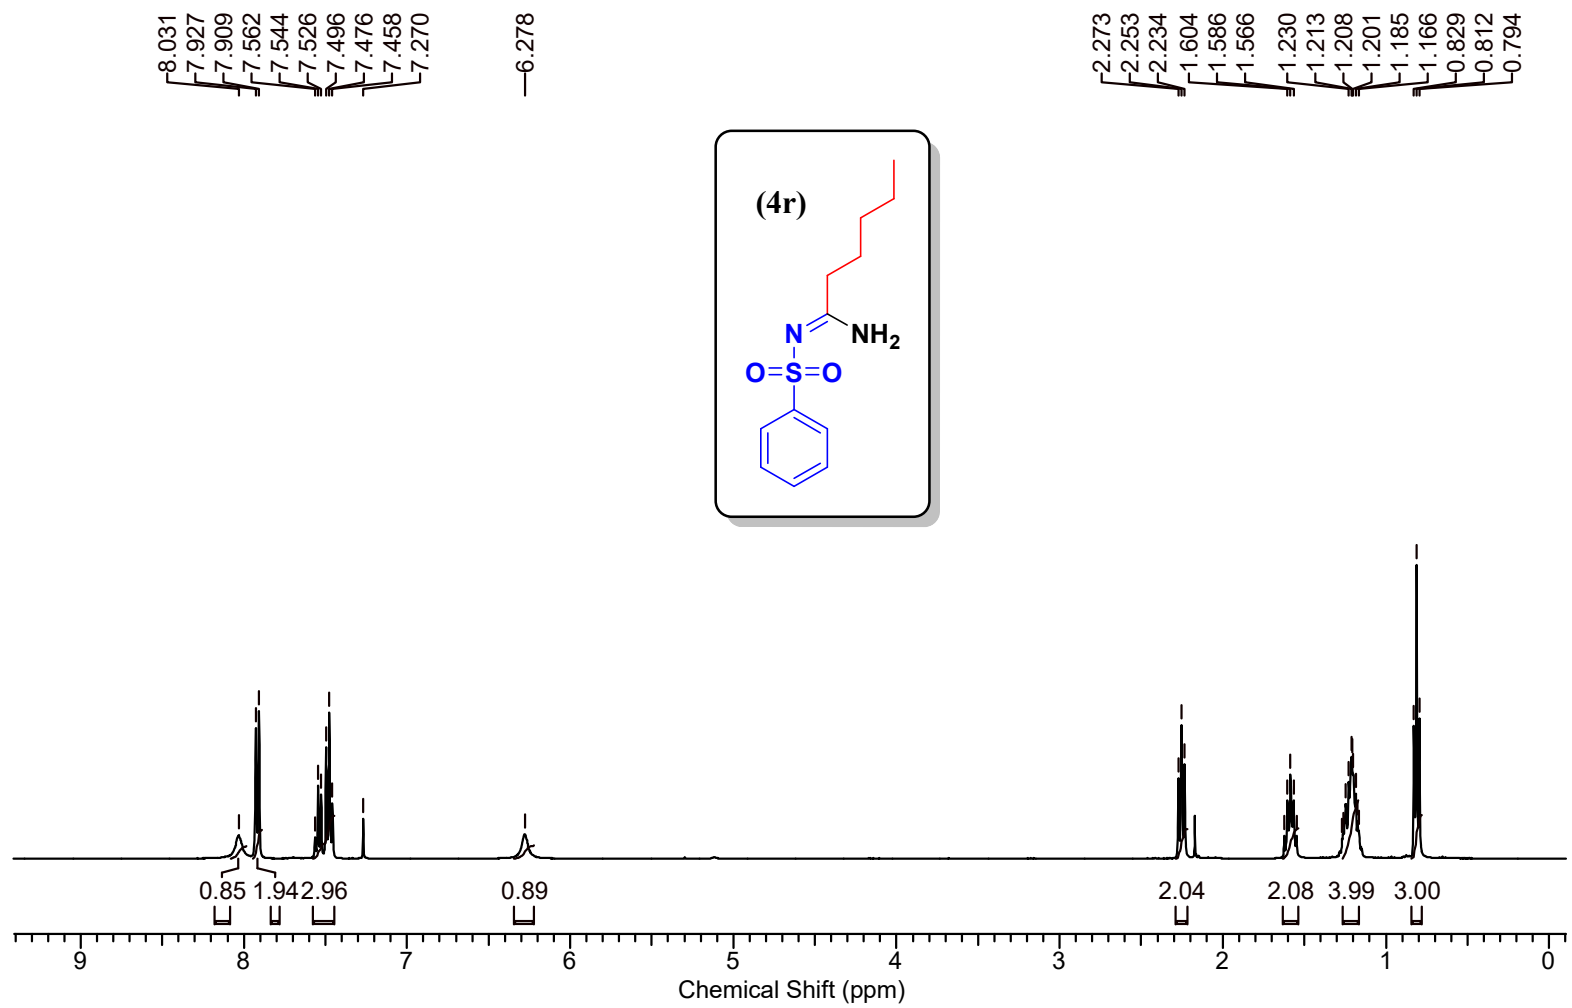



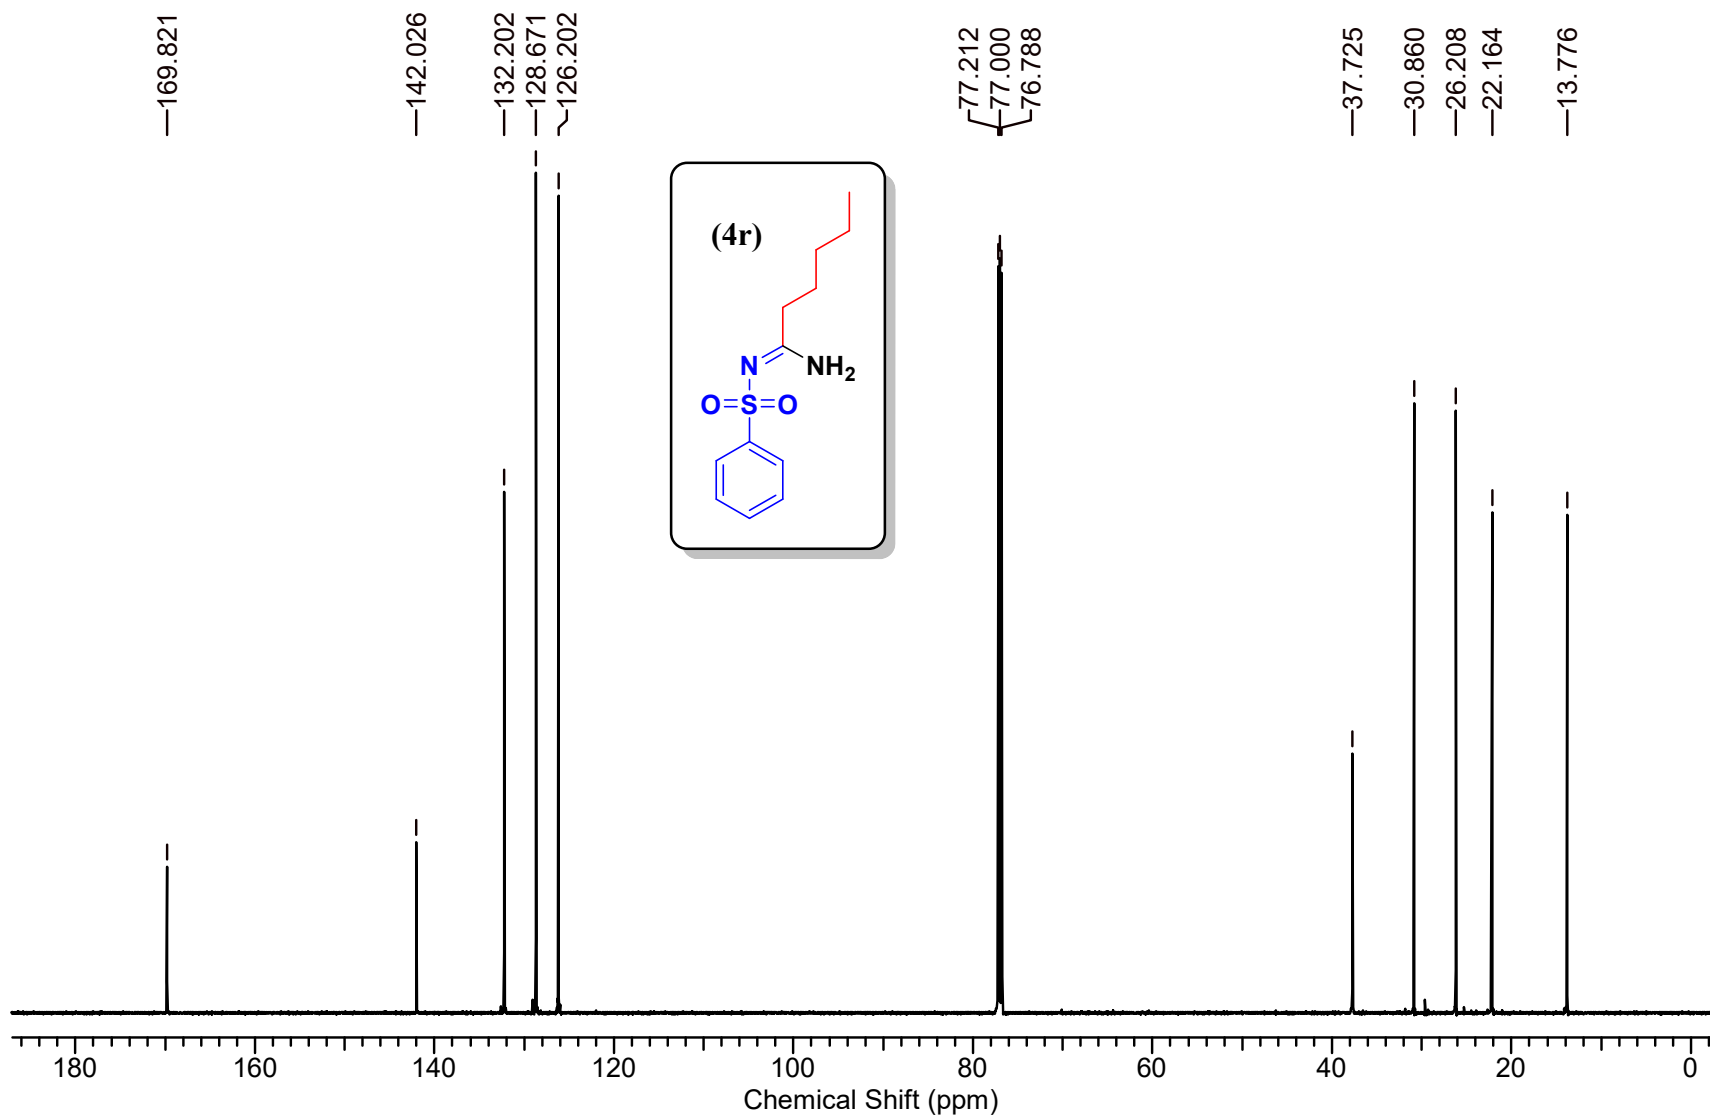

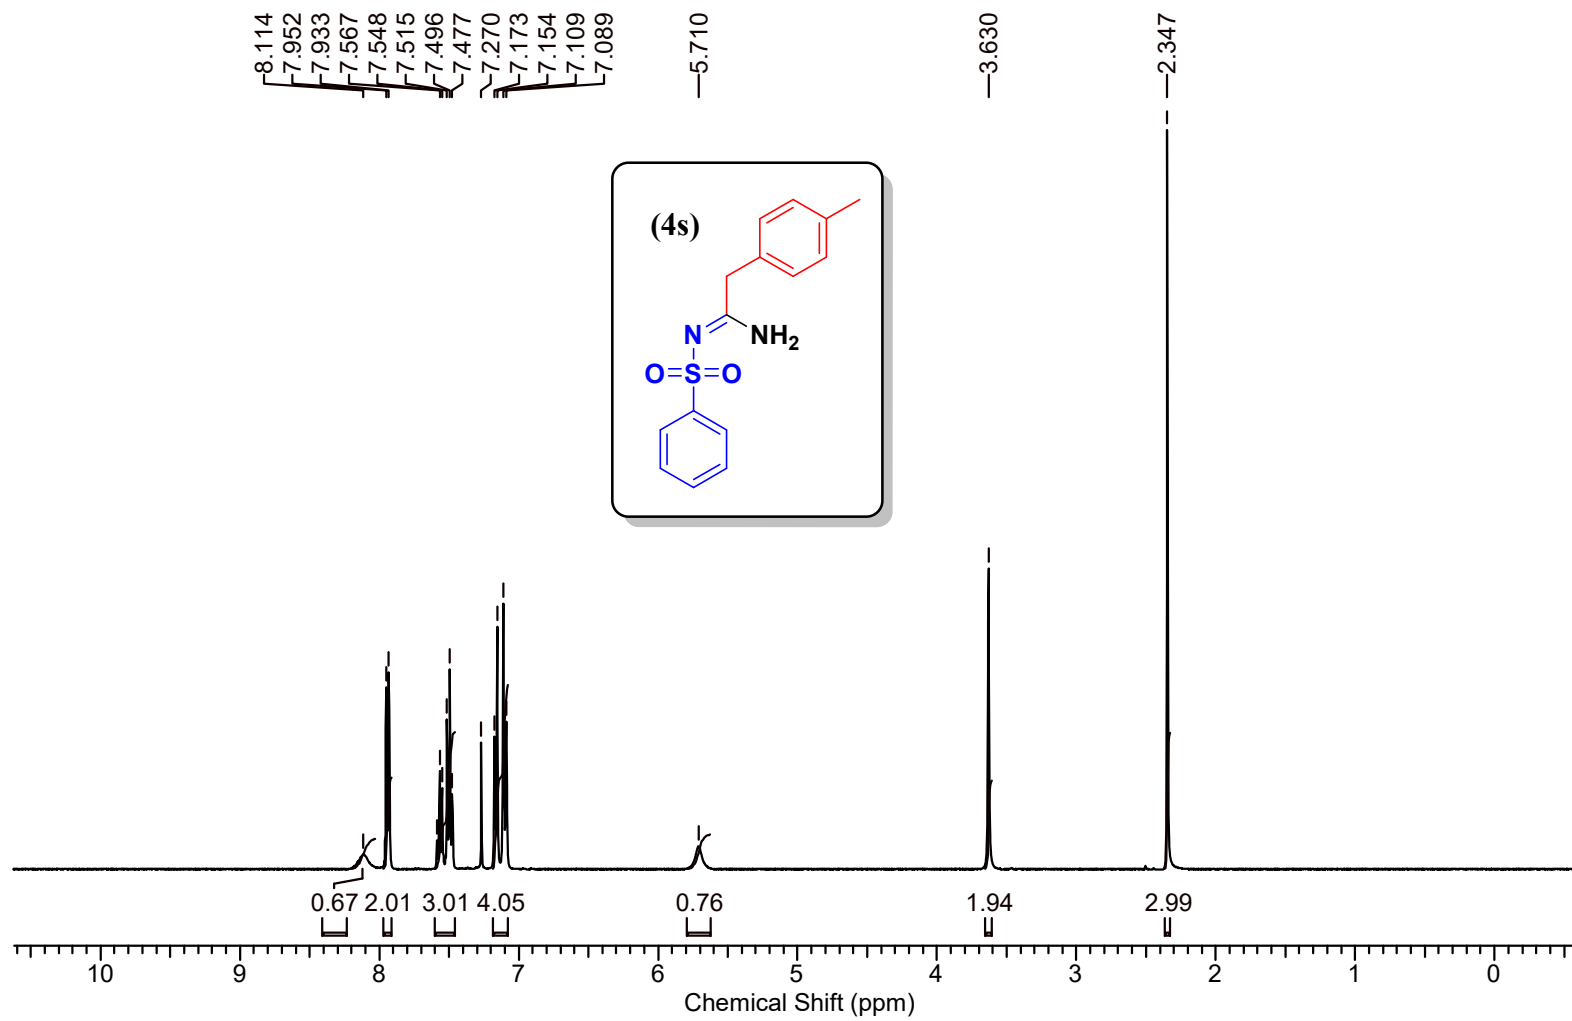

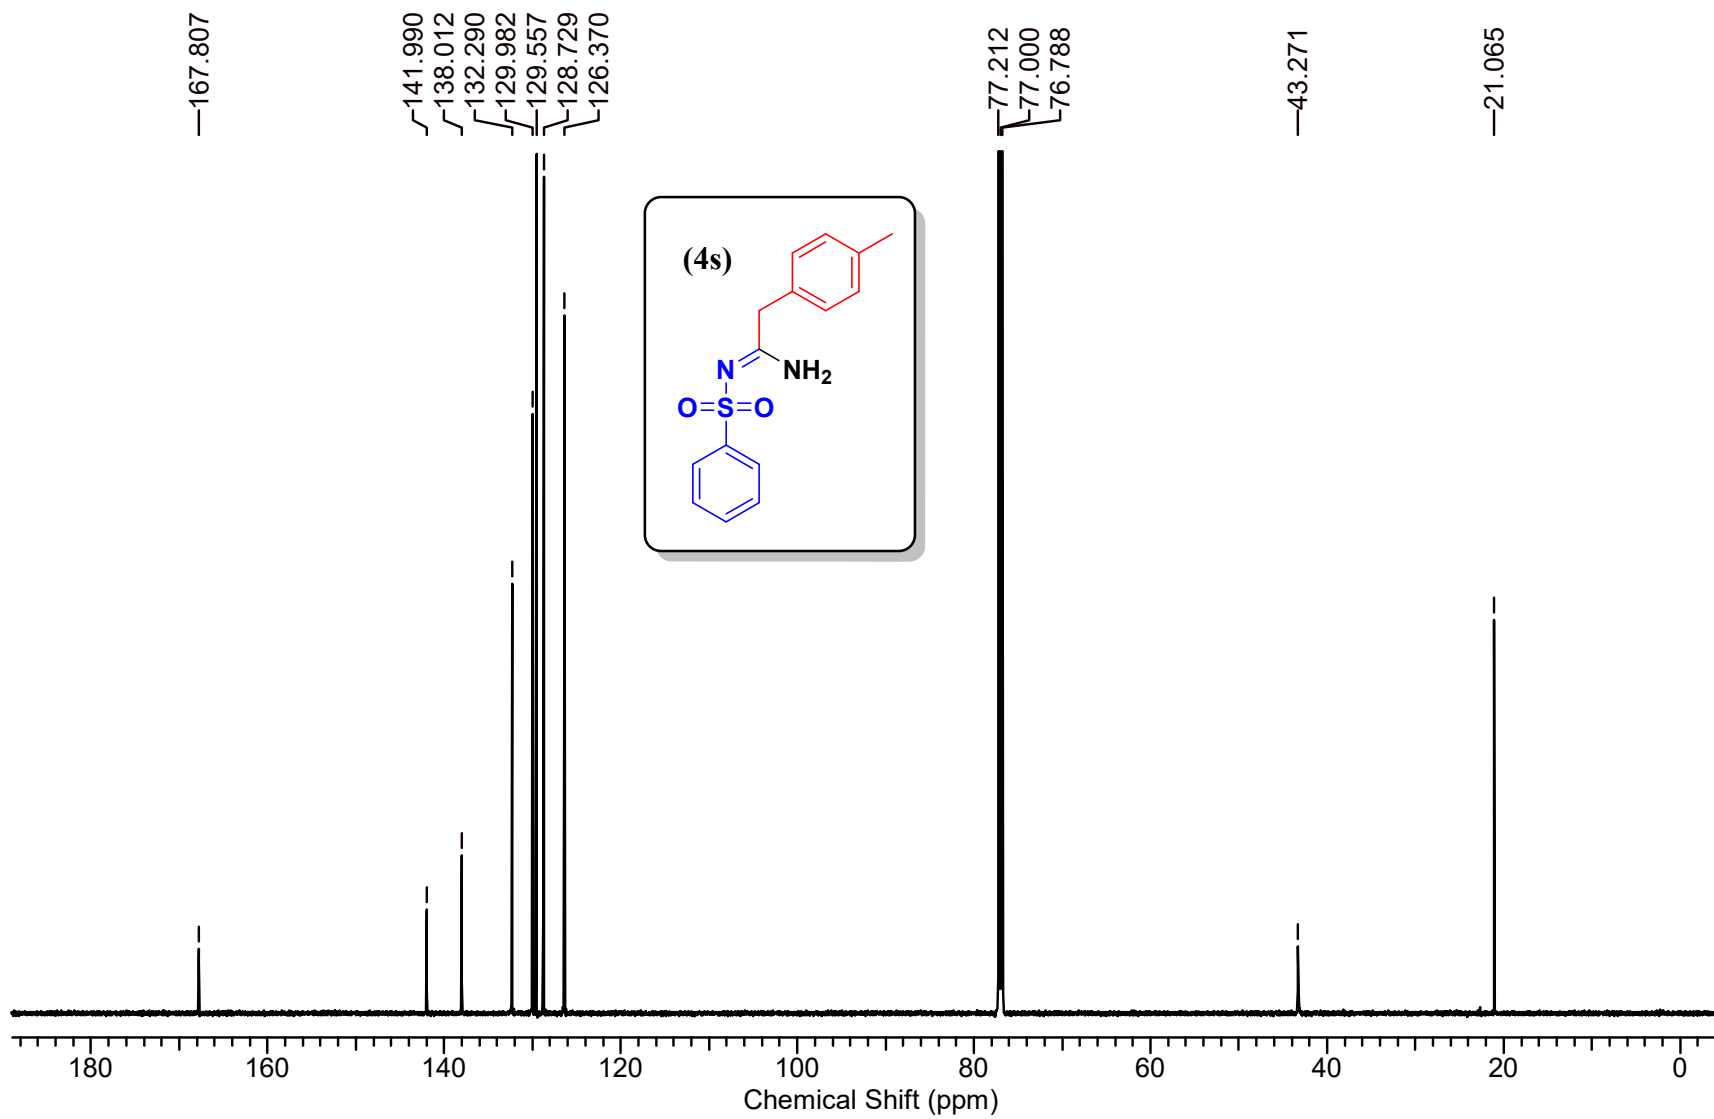

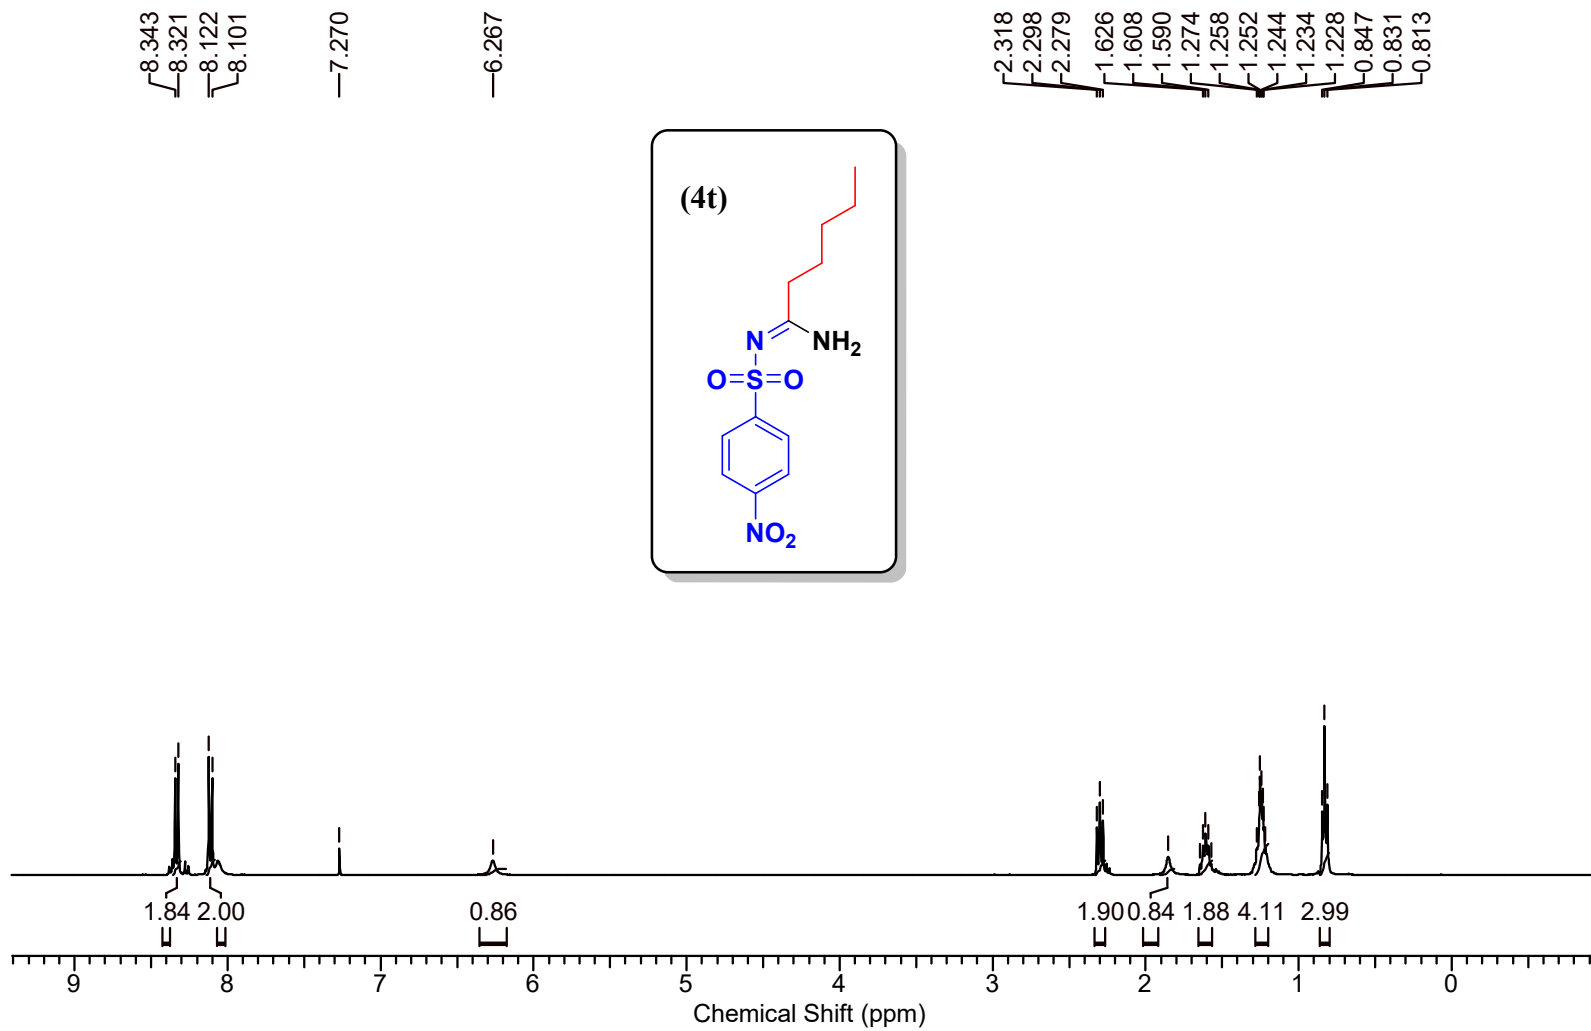

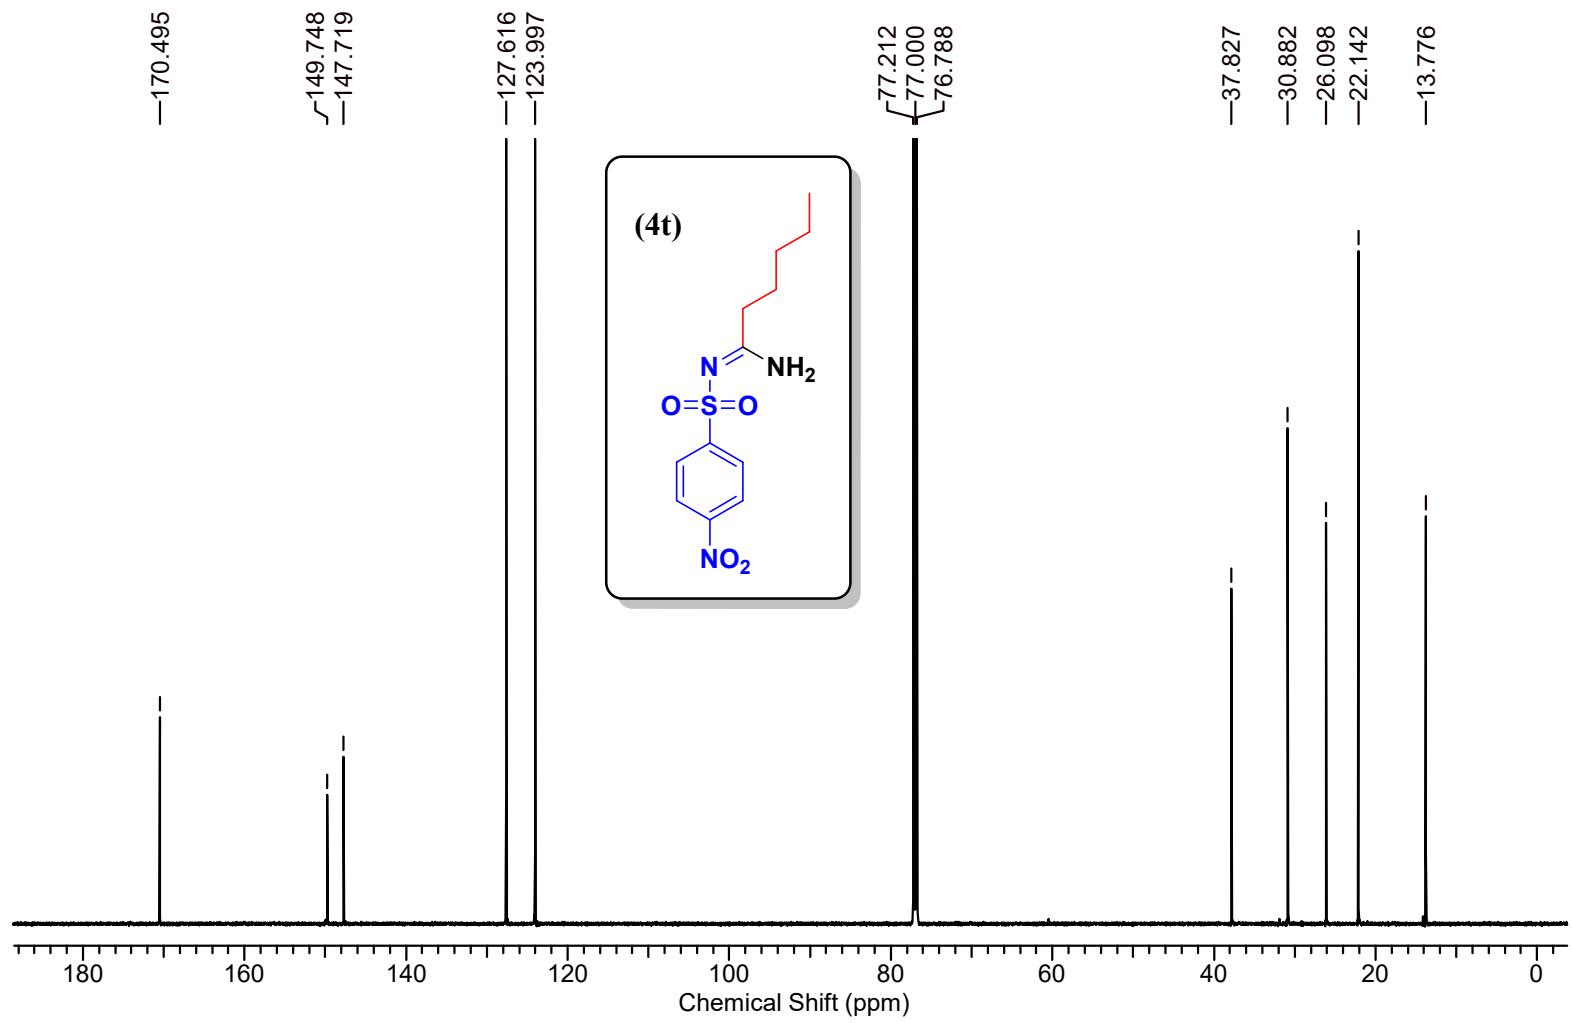

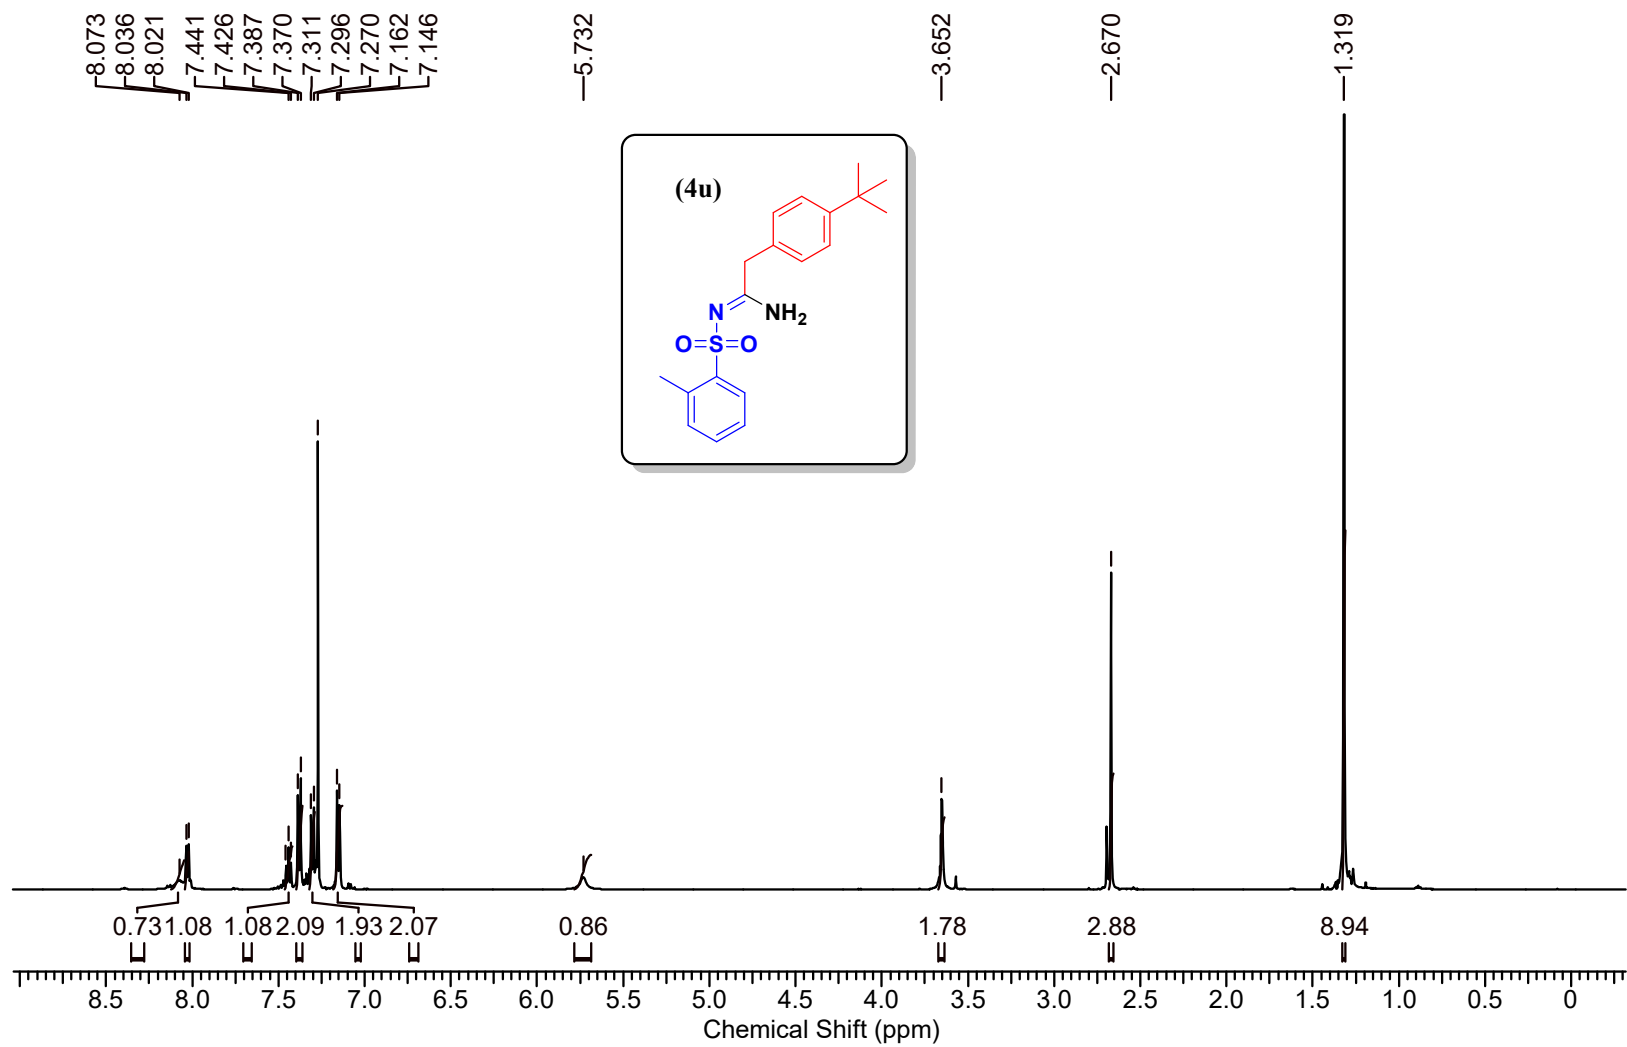

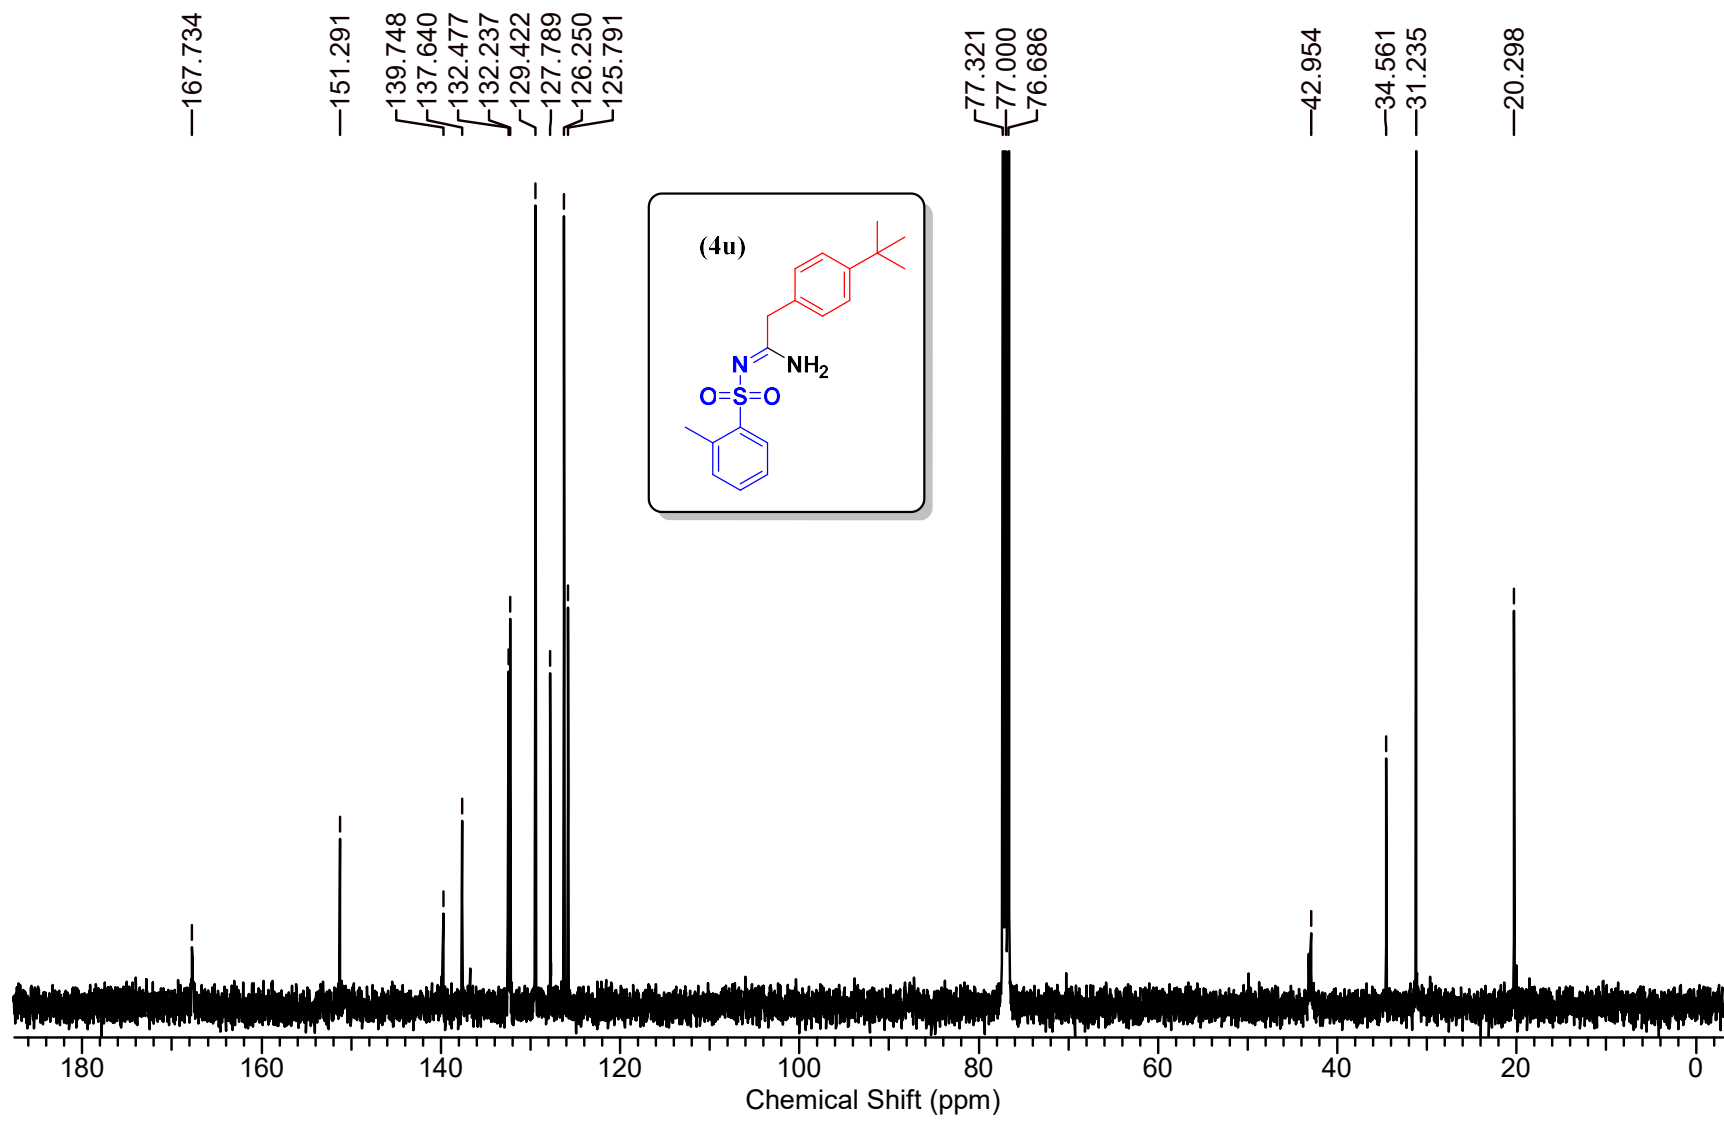

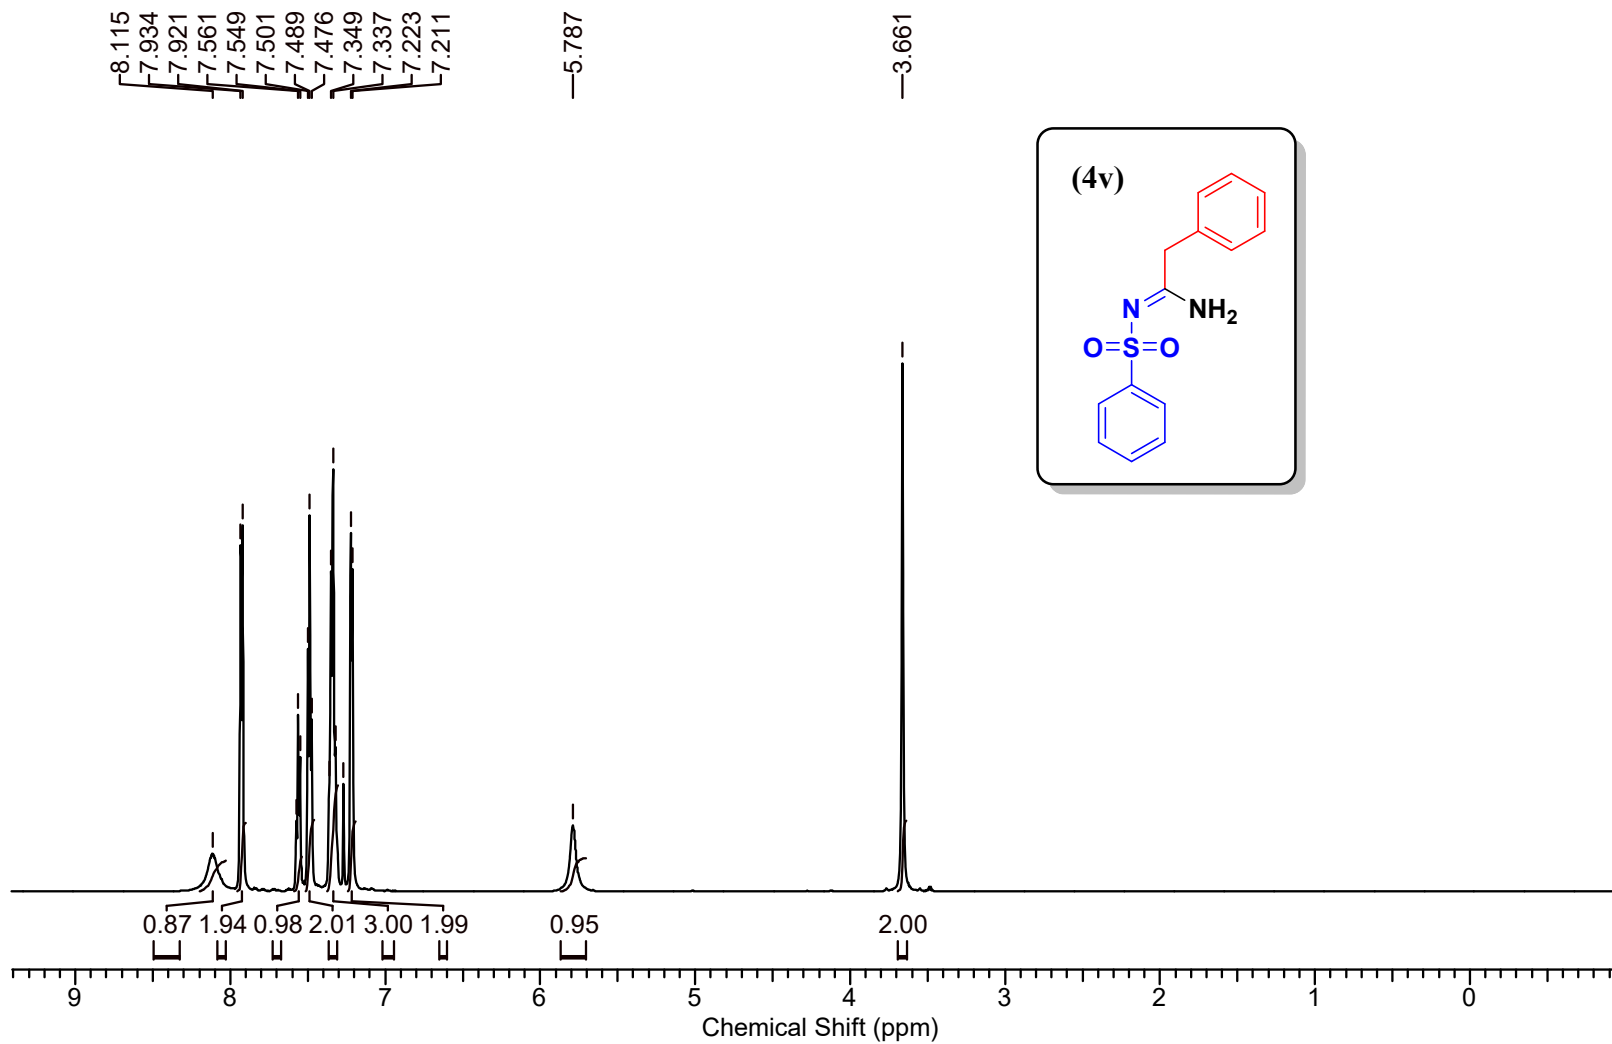



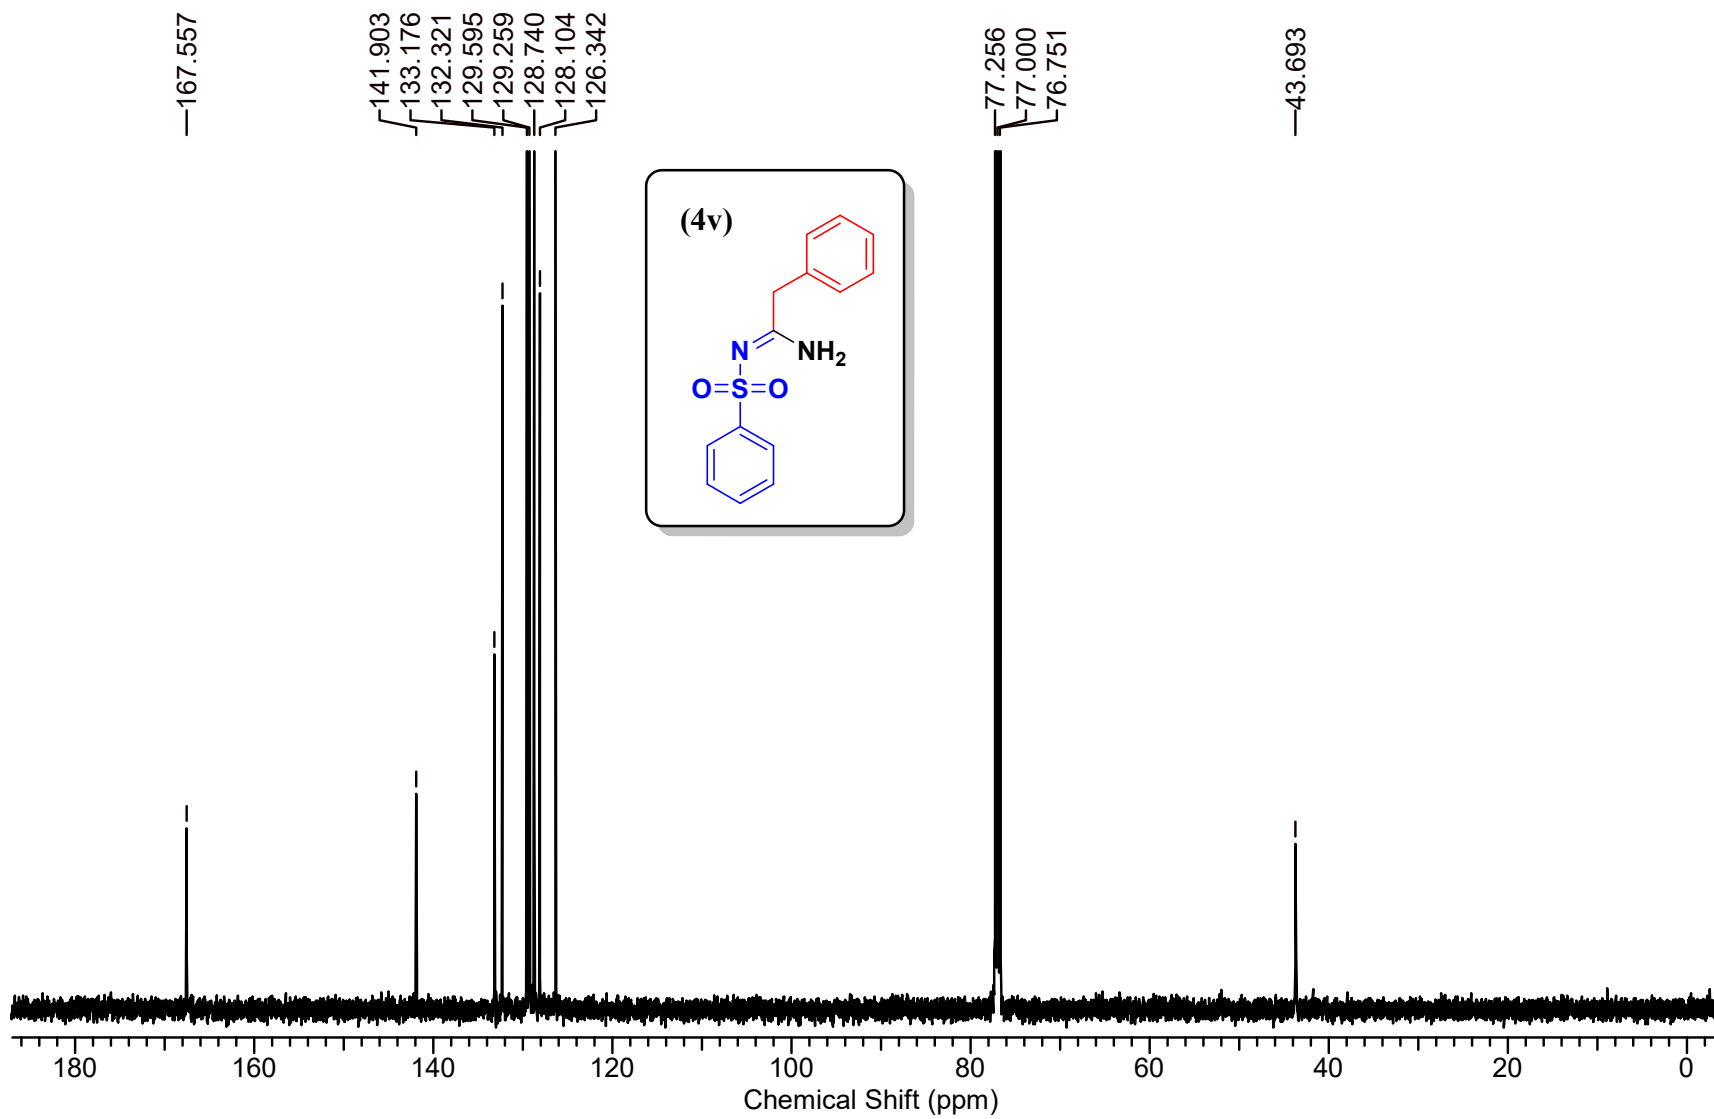

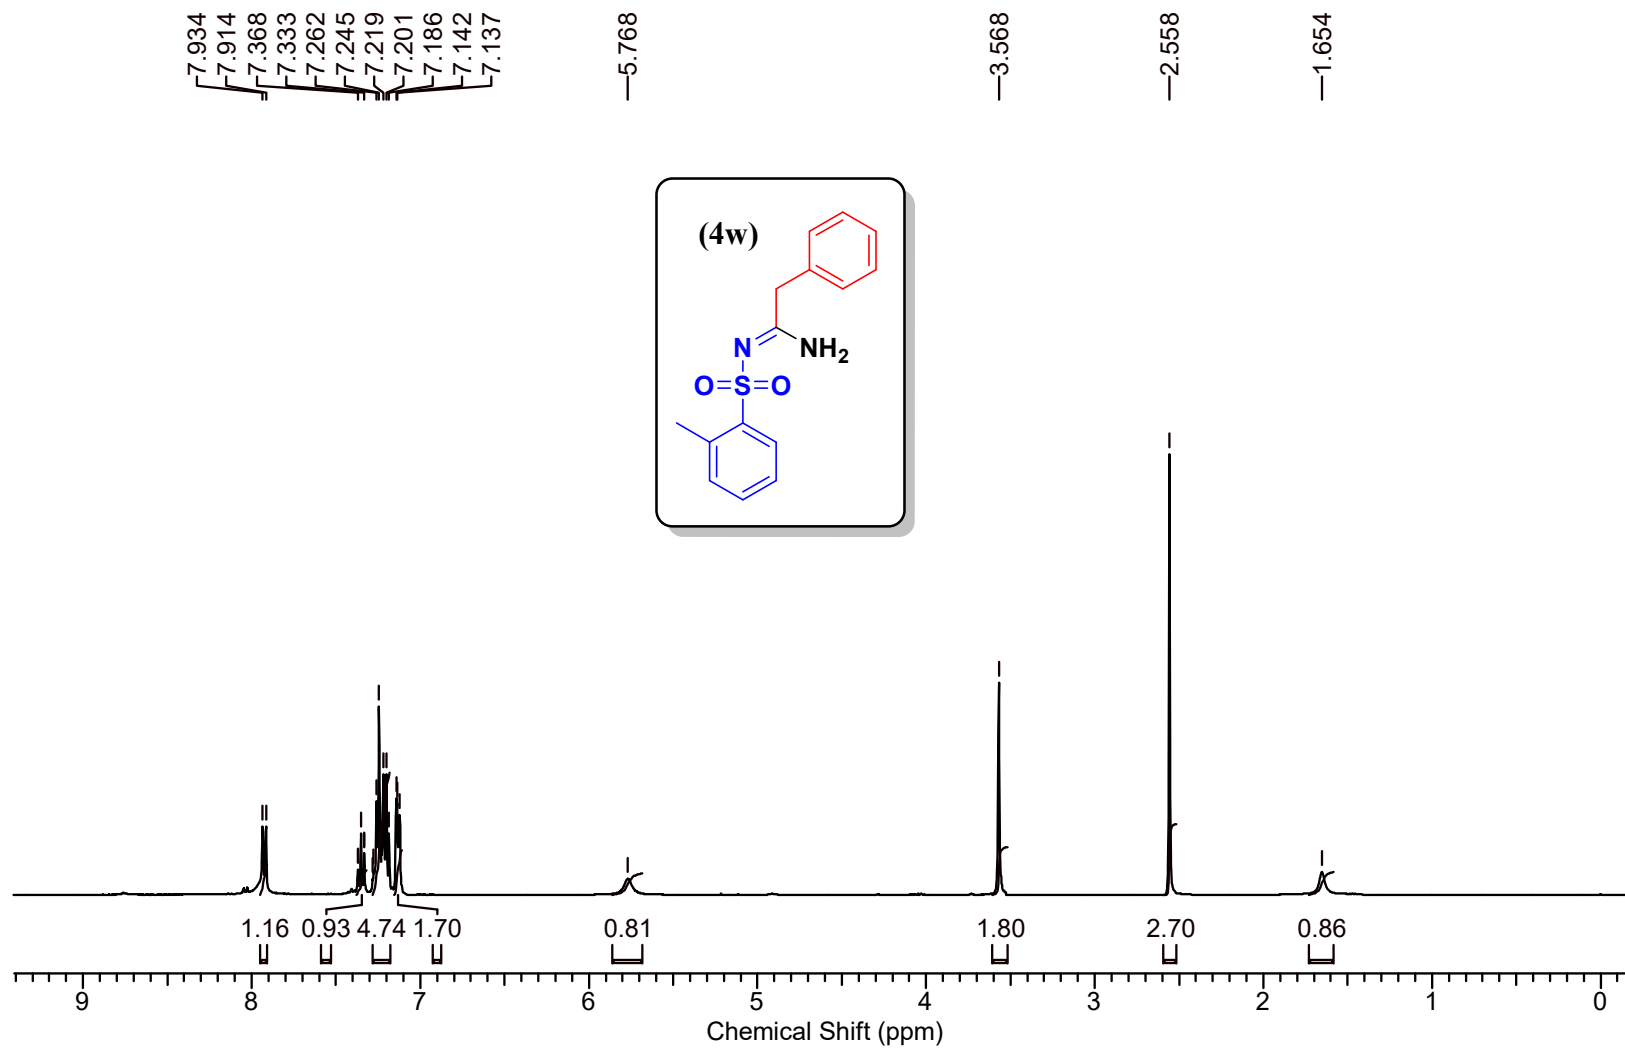

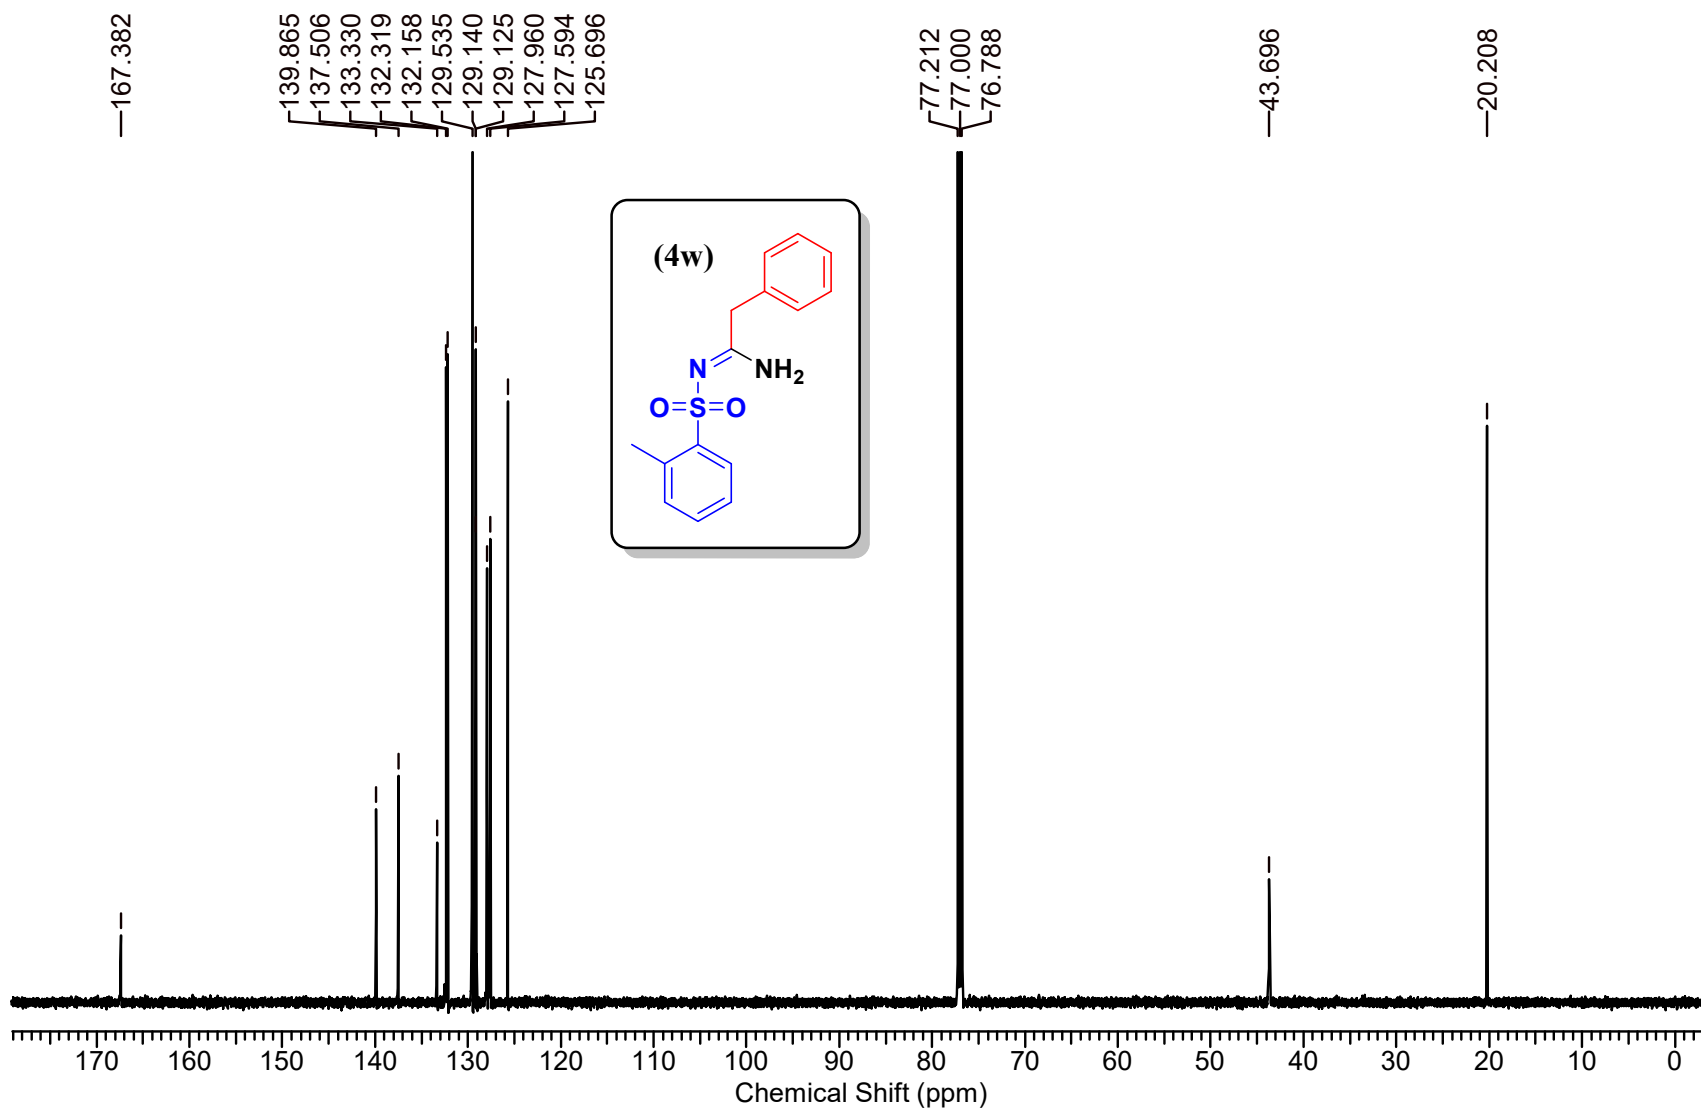

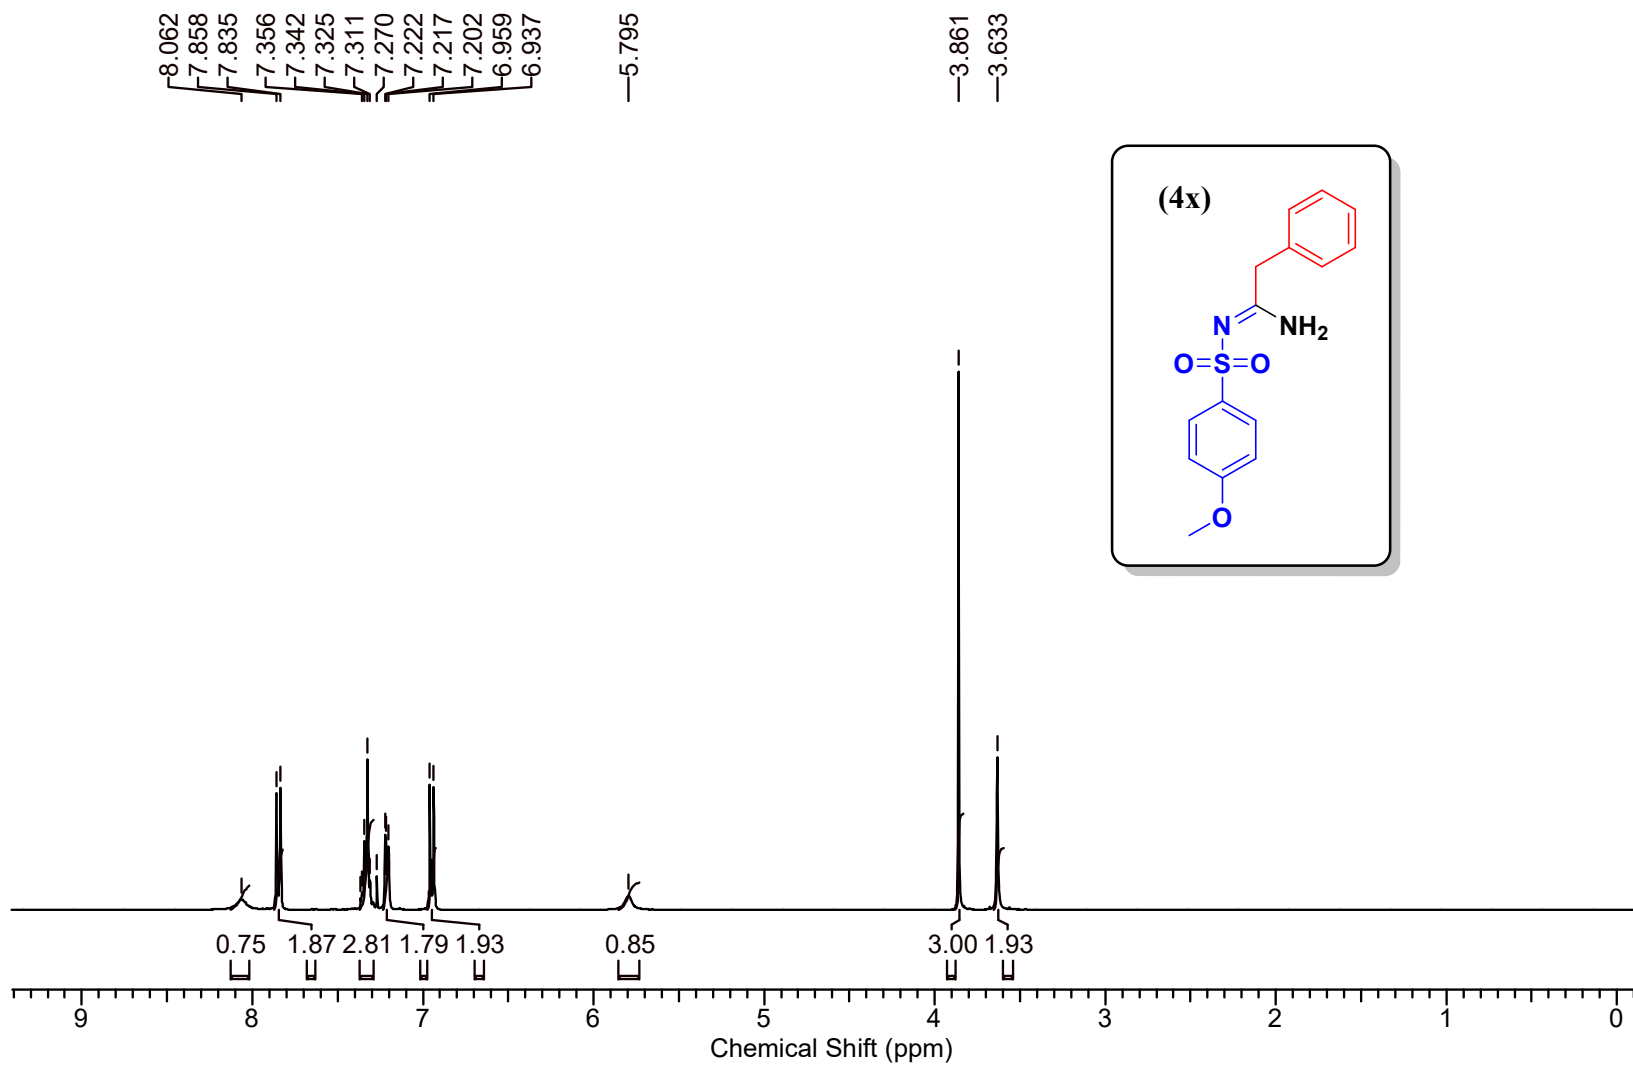

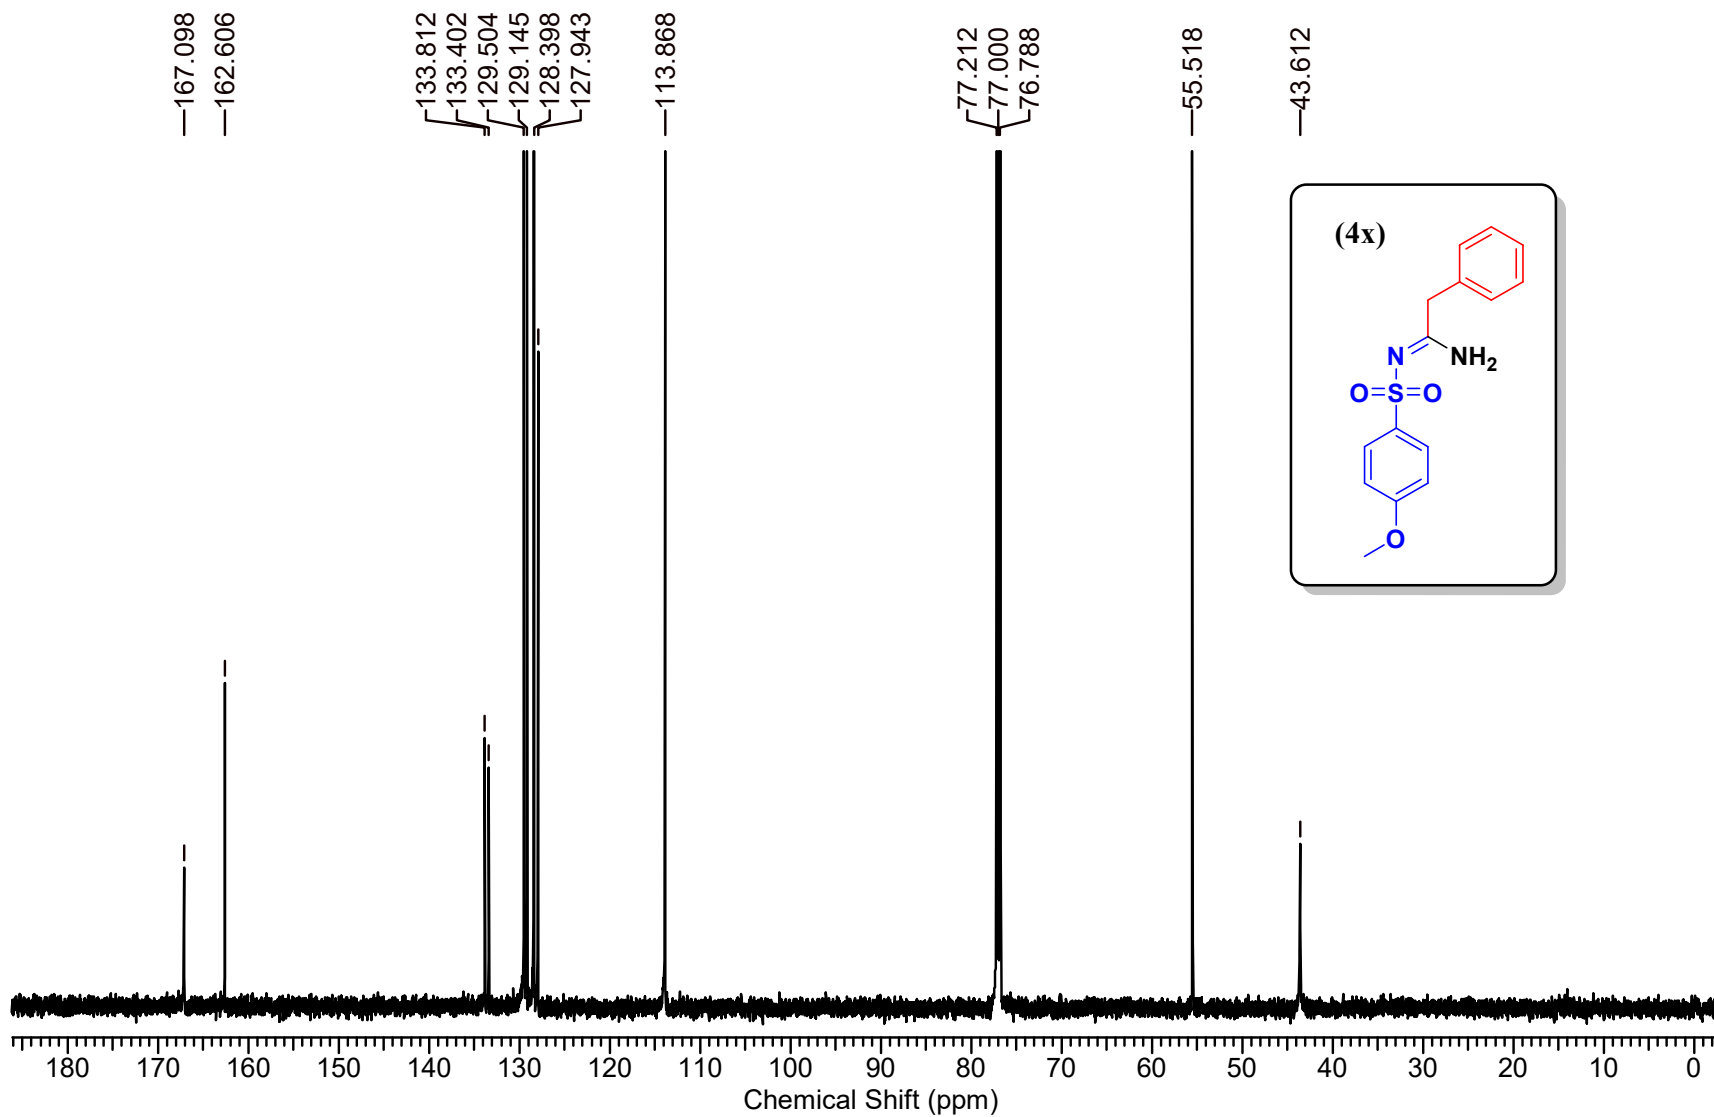

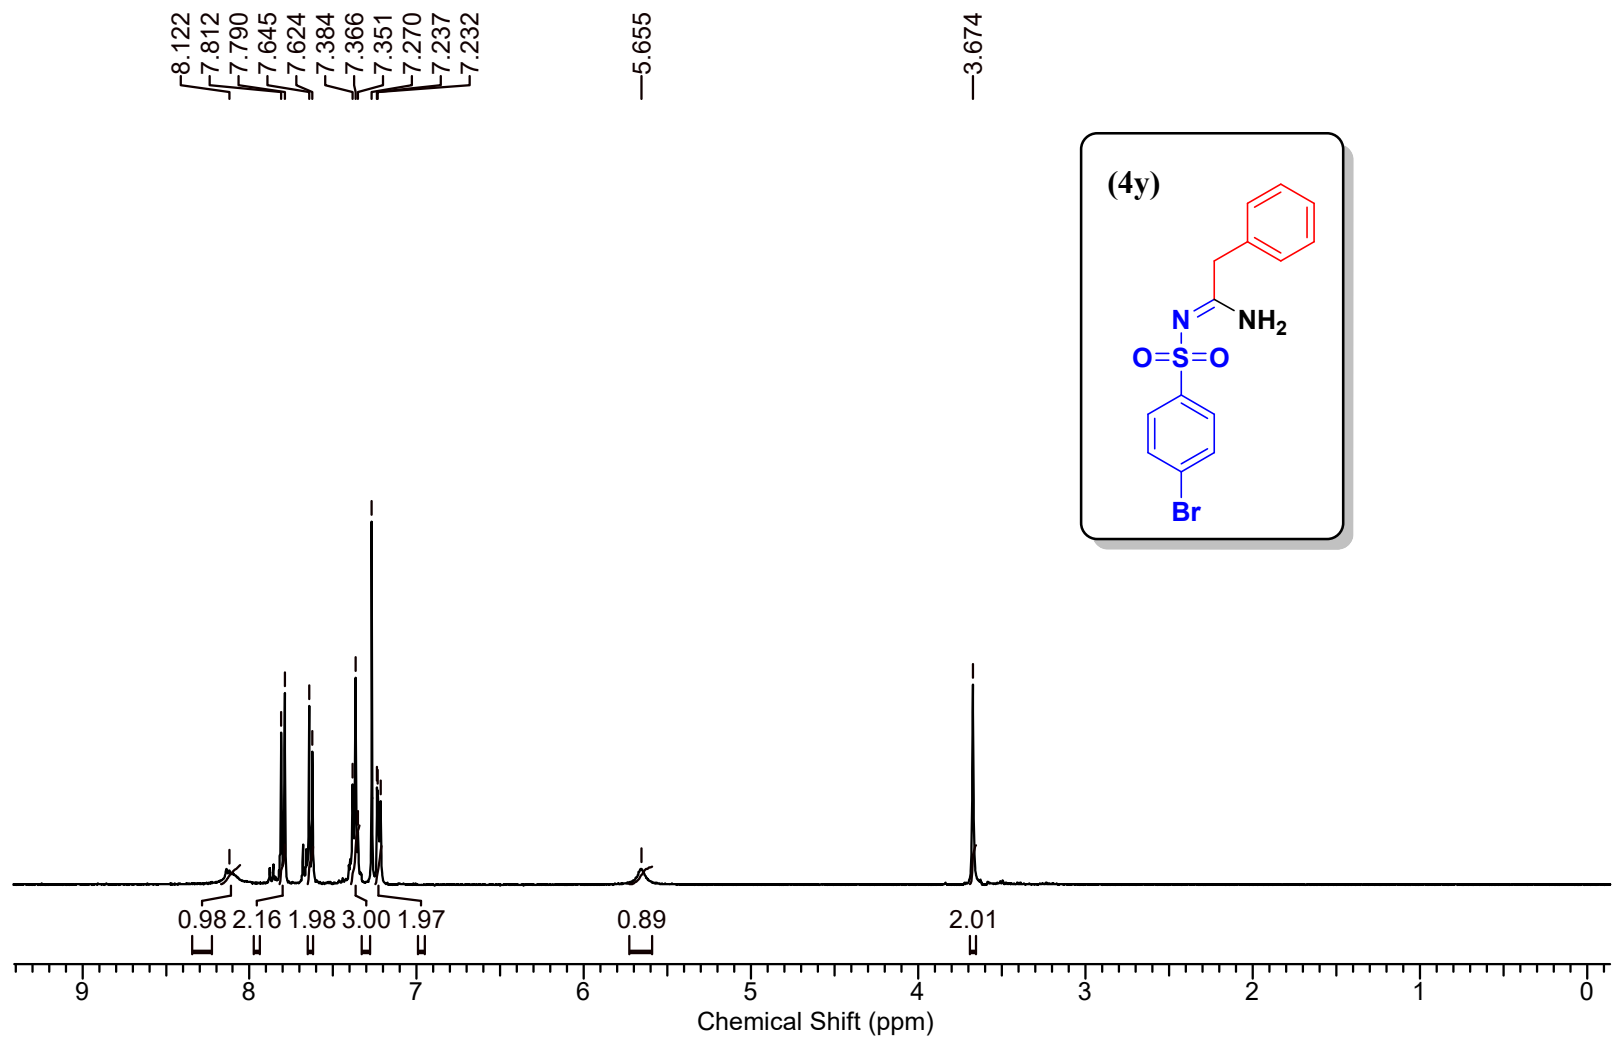

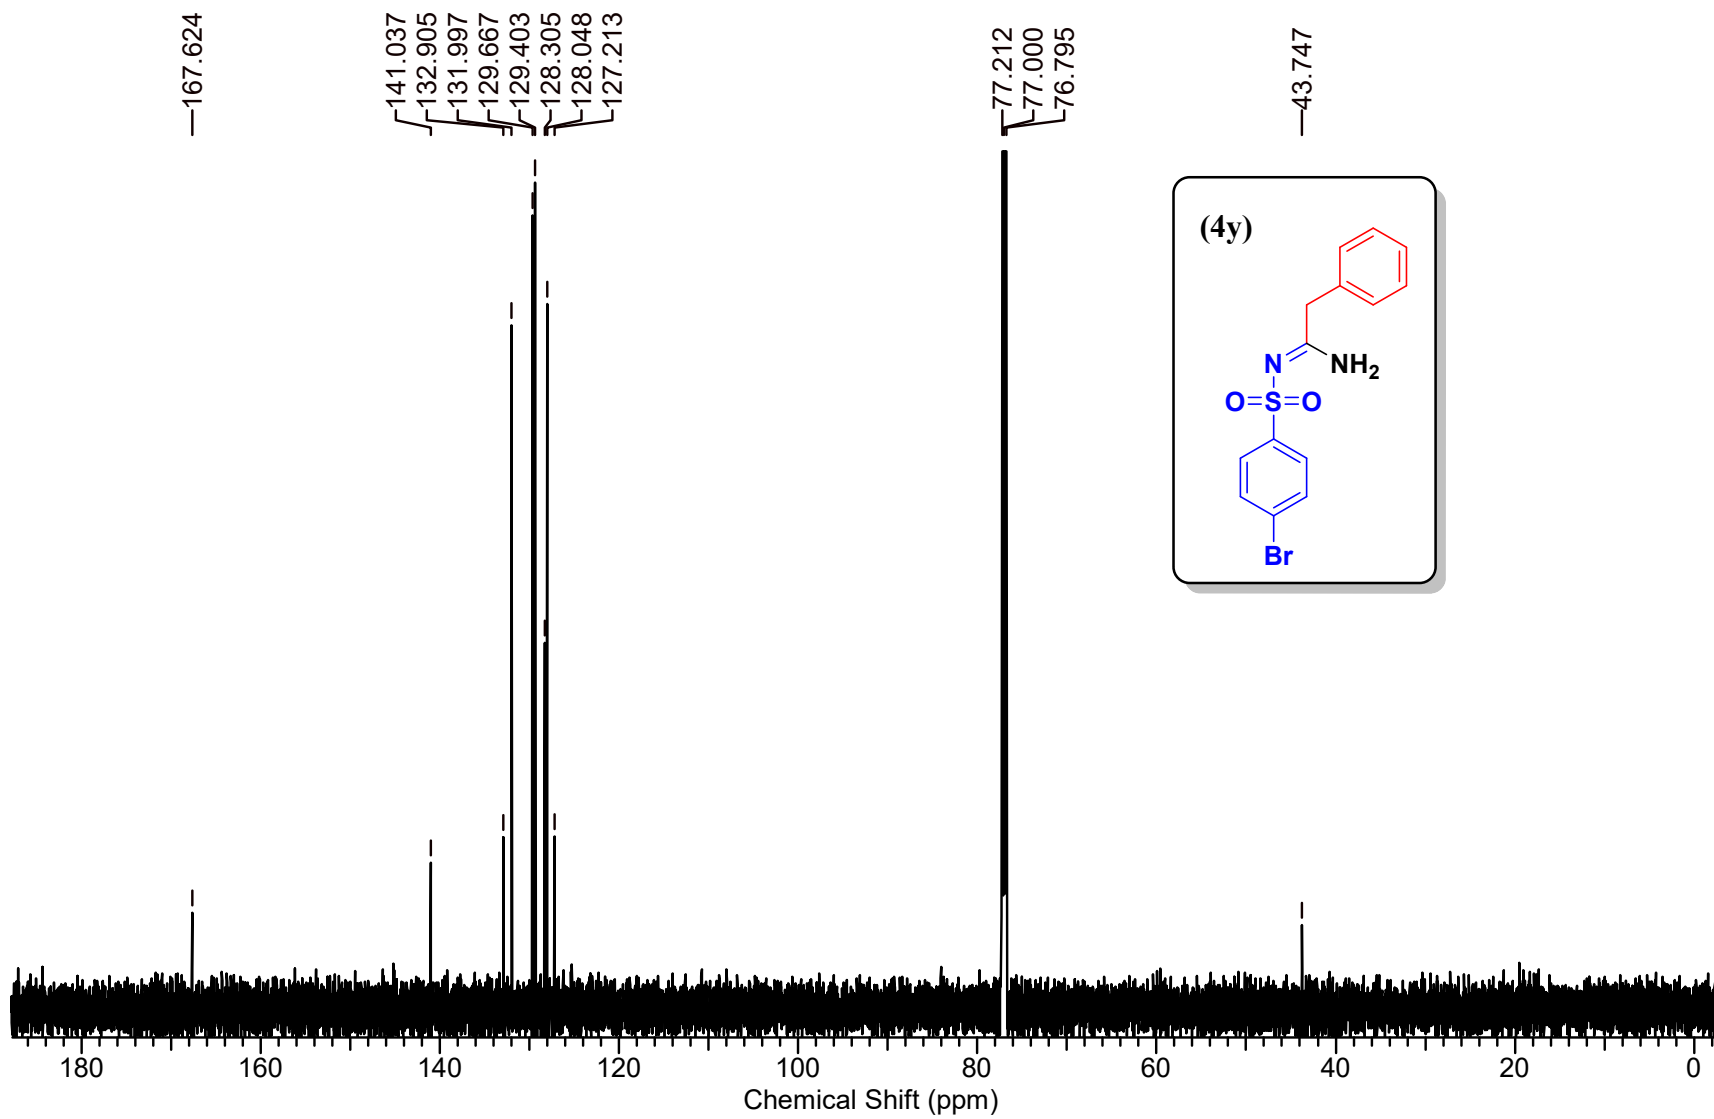

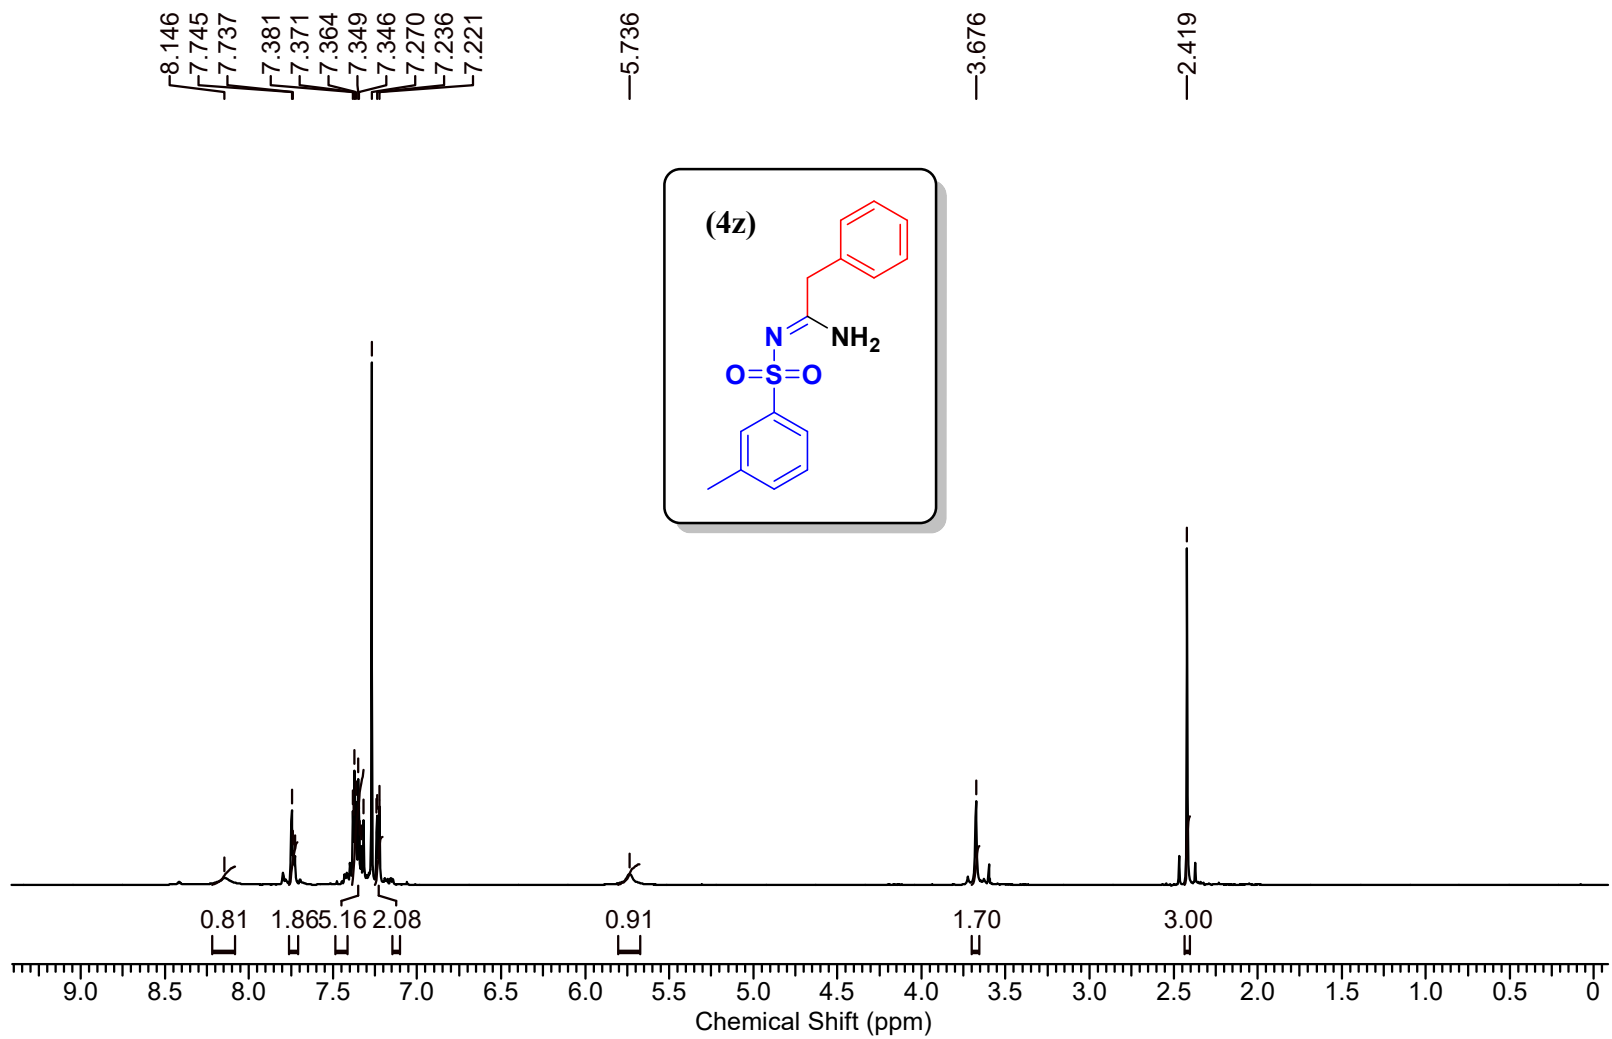



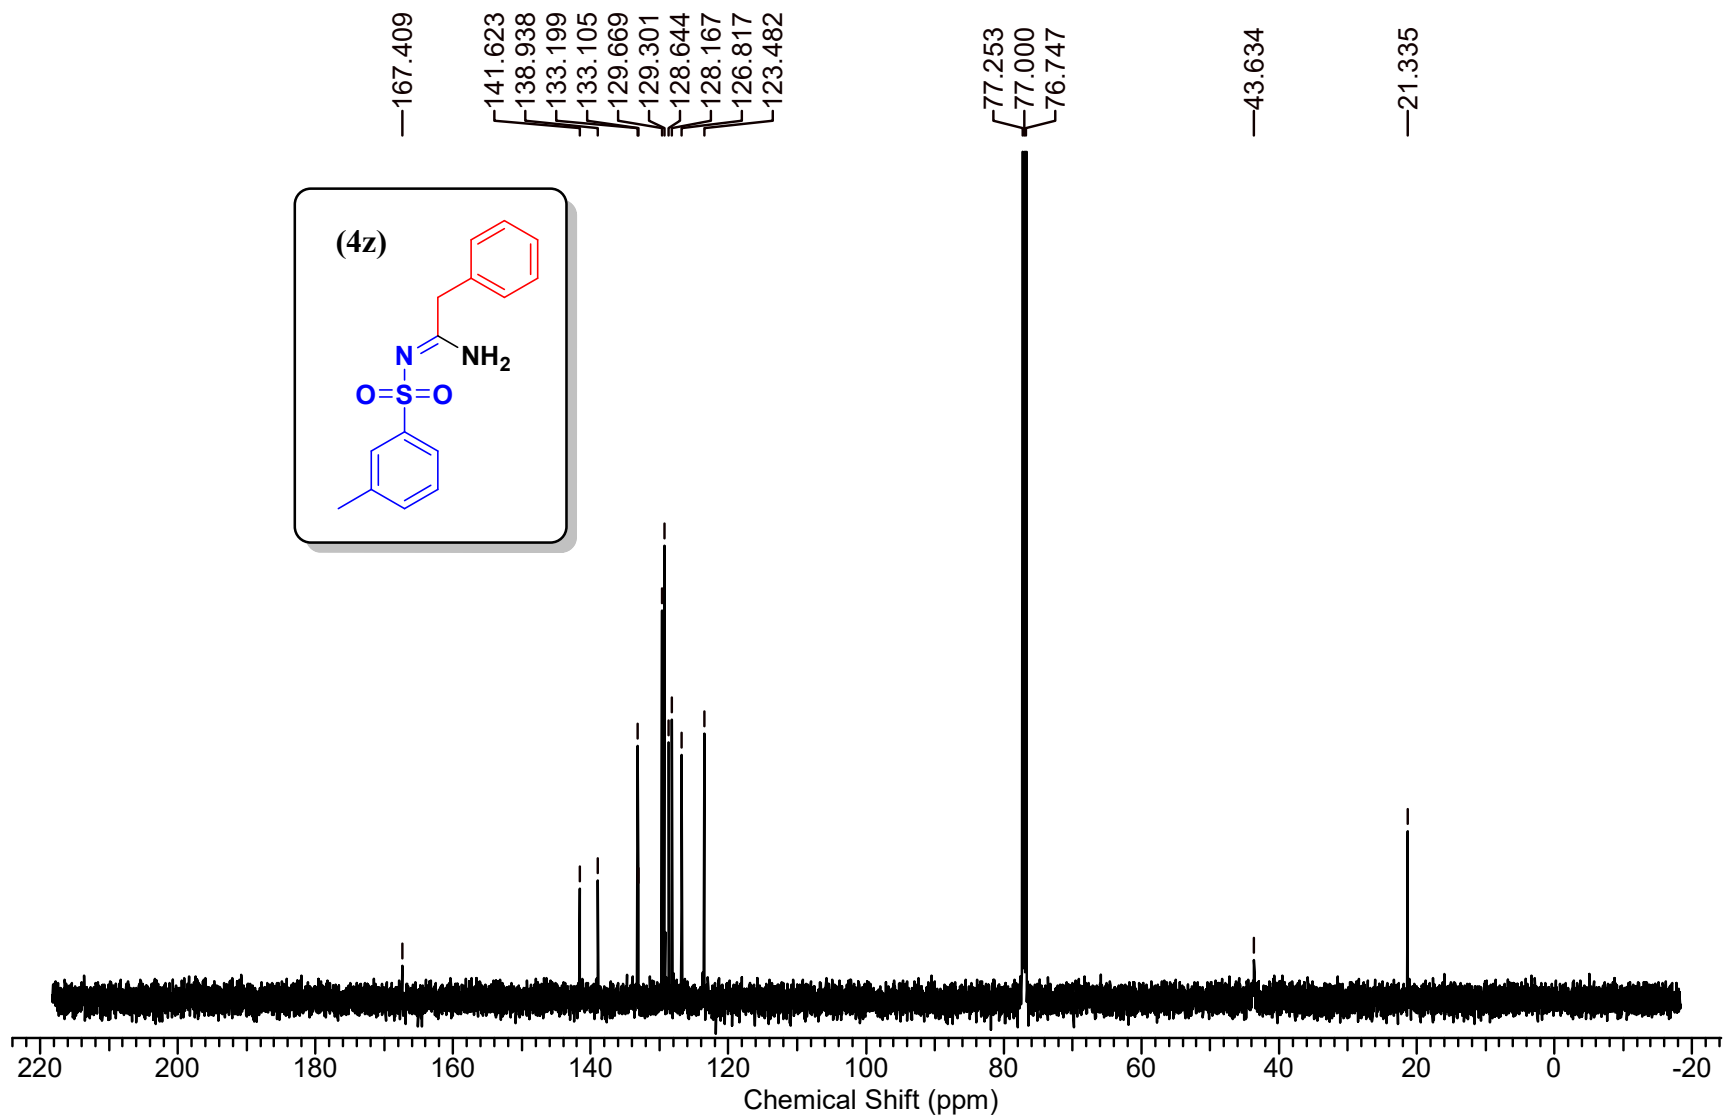

Supplement: d4gc04033c1.pdf [file d4gc04033c1.pdf]
